# Supplementary material for: Trifluoromethylthiolative spirocyclization of biaryl ynones without leaving groups on the para-position of dearomatized aryl rings
Source: Royal Society of Chemistry journal article supplement (doi:10.1039/d2nj01056a), 2022-01-01

## Supporting Information for

### Trifluoromethylthiolative spirocyclization of biaryl ynones without leaving groups on the *para*-position of dearomative aryl rings

You Liang,<sup>a,b</sup> Sijin Wang,<sup>a</sup> Huijuan Jia,<sup>a</sup> Beibei Chen,<sup>b</sup> Feng Zhu,<sup>c</sup> and Zhongyang Huo<sup>\*a</sup>

<sup>a</sup> Co-Innovation Center for Modern Production Technology of Grain Crop/Jiangsu Key Laboratory of Crop Genetics and Physiology, Yangzhou University, Yangzhou 225009, P.R. China. E-mail: huozy69@163.com

<sup>b</sup> College of Plant Science, Tarim University, Alaer 843300, P.R. China

<sup>c</sup> Plant Protection and Plant Quarantine Station of Jiangsu Province, Nanjing 210014, P.R. China

#### Table of Contents for Supporting Information

|                                                                                                     |    |
|-----------------------------------------------------------------------------------------------------|----|
| 1. General considerations.....                                                                      | 2  |
| 2. Preparation of the starting materials.....                                                       | 3  |
| 3. General procedure for the synthesis of <b>3</b> and and <sup>18</sup> O-labeling experiment..... | 3  |
| 4. Characterization data of products.....                                                           | 4  |
| 5. <sup>1</sup> H NMR, <sup>13</sup> C NMR and <sup>19</sup> F NMR of the products.....             | 26 |

## 1. General considerations

All reactions were carried out under air.  $^1\text{H}$  NMR  $^{13}\text{C}$  NMR and  $^{19}\text{F}$  NMR spectra were measured on a Bruker Avance NMR spectrometer (400 MHz/100 MHz/377 NMR; or 600 MHz/151 MHz/565 NMR) in  $\text{CDCl}_3$  as solvent and recorded in ppm relative to internal tetramethylsilane standard.  $^1\text{H}$  NMR data are reported as follows:  $\delta$ , chemical shift; coupling constants ( $J$  are given in Hertz, Hz) and integration. Abbreviations to denote the multiplicity of a particular signal were s (singlet), d (doublet), t (triplet), q (quartet), dd (doublet of doublets) and m (multiplet). High resolution mass spectroscopy data of the product were collected on an Agilent Technologies 6540 UHD Accurate-Mass Q-TOF LC/MS (ESI).

## 2. Preparation of the starting materials

All of biaryl ynones (**1**), and AgSCF<sub>3</sub> (**2**) were prepared according to the reported methods (W.-C. Yang, M.-M. Zhang, Y. Sun, C.-Y. Chen, and L. Wang, *Org. Lett.*, 2021, **23**, 6691–6696).

## 3. General procedure for the synthesis of **3** and <sup>18</sup>O-labeling experiment.

**General procedure for the synthesis of **3**:** A 15 mL pressure tube was charged with biaryl ynones (**1a**, 0.2 mmol), AgSCF<sub>3</sub> (**2**, 0.4 mmol), HMPA (0.4 mmol), K<sub>2</sub>S<sub>2</sub>O<sub>8</sub> (0.6 mmol), TBHP (1.0 mmol, 70% aqueous solution), MeCN (2 mL), and a magnetic stir bar. Then the mixtures were allowed to react at 80 °C for 10 h under nitrogen conditions. After completion of the reaction, the mixture was concentrated to yield the crude product, which was further purified by flash chromatography (silica gel, petroleum ether/ethyl acetate = 7:1) to give the desired product **3a**.

**<sup>18</sup>O-labeling experiment:** A 15 mL pressure tube was charged with biaryl ynones (**1a**, 0.2 mmol), AgSCF<sub>3</sub> (**2**, 0.4 mmol), HMPA (0.4 mmol), K<sub>2</sub>S<sub>2</sub>O<sub>8</sub> (0.6 mmol), TBHP (1.0 mmol, 5.5 M in decane), anhydrous MeCN (2 mL), and a magnetic stir bar. Then the mixtures were allowed to react at 80 °C for 10 h under nitrogen conditions. After completion of the reaction, the mixture was concentrated to yield the crude product, which was further

purified by flash chromatography (silica gel, petroleum ether/ethyl acetate = 7:1) to give the desired product **3a**.

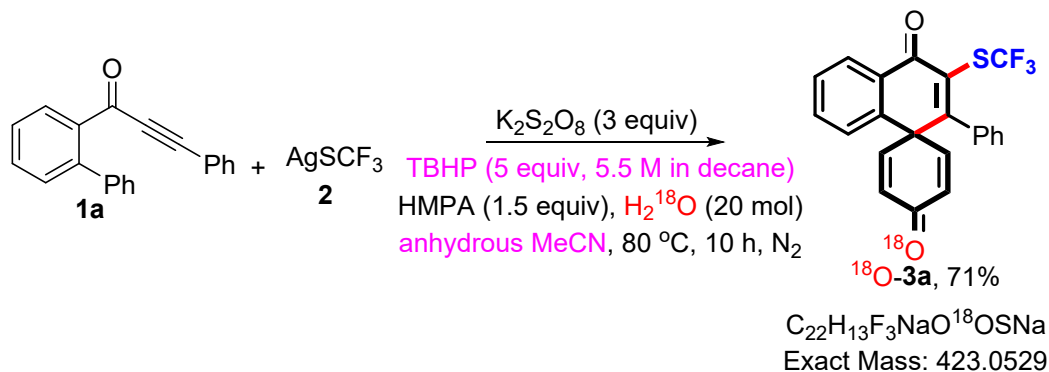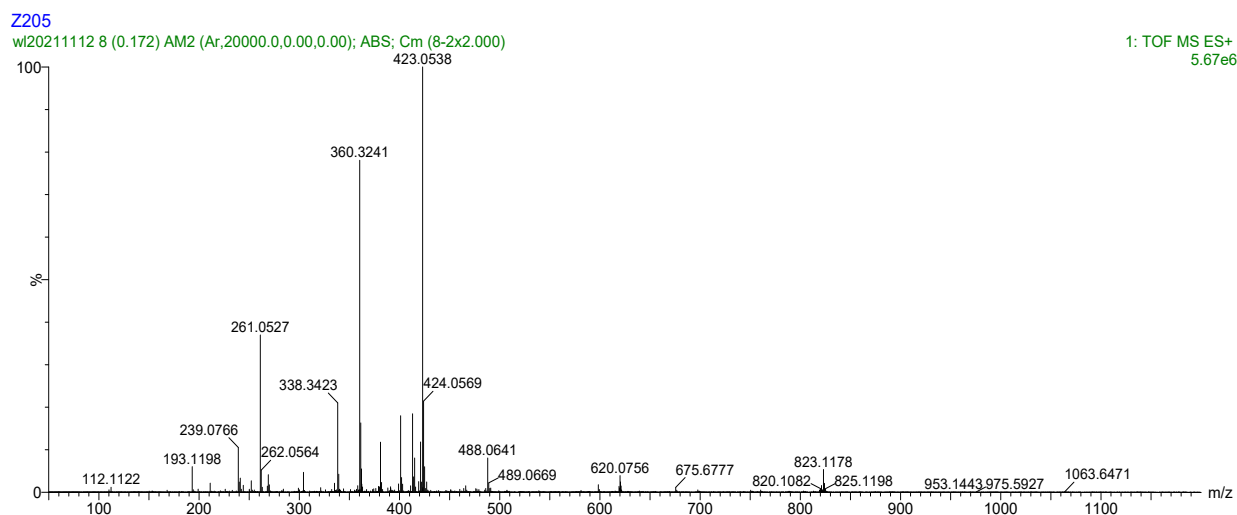

#### 4. Characterization data of raw materials and products

##### 1-([1,1'-biphenyl]-2-yl)-3-(3,5-dimethylphenyl)prop-2-yn-1-one (**1d**)

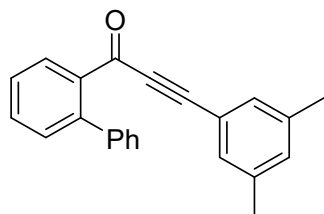

The product purified by flash column chromatography on silica gel (PE/AcOEt = 10:1) to afford the raw material as a yellow liquid (261.1 mg, 84% yield). **<sup>1</sup>H NMR (600 MHz, CDCl<sub>3</sub>)** δ 7.86 (dd, J = 7.7, 1.0 Hz, 1H), 7.47 – 7.43 (m, 1H), 7.35 (dd, J = 7.7, 0.8 Hz, 1H), 7.34 – 7.29 (m, 5H), 7.24 (d, J = 6.7 Hz, 1H), 6.87 (s, 1H), 6.77 (s, 2H), 2.13 (s, 6H). **<sup>13</sup>C NMR (151 MHz, CDCl<sub>3</sub>)** δ 180.6, 142.6, 140.5, 138.1, 137.9, 132.4, 132.1, 131.1, 130.7, 130.1, 129.6, 128.4, 127.8, 127.4, 119.7, 94.6, 88.5, 21.0.

**1-([1,1'-biphenyl]-2-yl)-3-(*m*-tolyl)prop-2-yn-1-one (1e)**

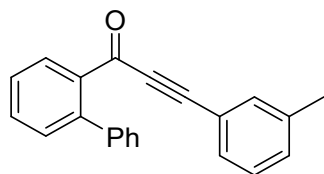

The product purified by flash column chromatography on silica gel (PE/AcOEt = 10:1) to afford the raw material as a yellow liquid (265.8 mg, 91% yield). **<sup>1</sup>H NMR (600 MHz, CDCl<sub>3</sub>)** δ 7.84 – 7.80 (m, 1H), 7.41 (td, J = 7.5, 1.3 Hz, 1H), 7.31 (dd, J = 7.6, 0.9 Hz, 1H), 7.29 – 7.25 (m, 5H), 7.21 – 7.16 (m, 1H), 7.00 (dd, J = 4.7, 1.7 Hz, 2H), 6.94 – 6.89 (m, 2H), 2.12 (s, 3H). **<sup>13</sup>C NMR (151 MHz, CDCl<sub>3</sub>)** δ 180.6, 142.7, 140.5, 138.1, 138.1, 133.6, 132.2, 131.4, 131.1, 130.1, 130.1, 129.6, 128.4, 128.2, 127.8, 127.5, 119.9, 94.2, 88.7, 21.1.

**1-([1,1'-biphenyl]-2-yl)-3-(4-fluorophenyl)prop-2-yn-1-one (1g)**

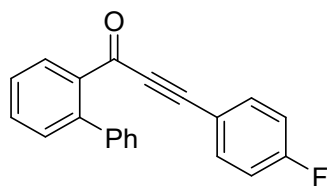

The product purified by flash column chromatography on silica gel (PE/AcOEt = 10:1) to afford the raw material as a yellow liquid (271.85 mg, 90% yield). **<sup>1</sup>H NMR (600 MHz, CDCl<sub>3</sub>)**  $\delta$  7.94 (dd, *J* = 7.8, 1.2 Hz, 1H), 7.59 (td, *J* = 7.5, 1.3 Hz, 1H), 7.48 (td, *J* = 7.6, 1.2 Hz, 1H), 7.46 – 7.38 (m, 5H), 7.37 – 7.31 (m, 1H), 7.24 – 7.19 (m, 2H), 7.00 – 6.92 (m, 2H). **<sup>13</sup>C NMR (151 MHz, CDCl<sub>3</sub>)**  $\delta$  180.5, 164.6, 162.9, 142.7, 140.4, 137.9, 135.22 (d, *J* = 9.0 Hz), 132.2, 131.0, 130.0, 129.6, 128.3, 127.8, 127.4, 116.21 (d, *J* = 3.6 Hz), 115.8, 115.7, 92.7, 88.7.

### 1-([1,1'-biphenyl]-2-yl)-3-(4-ethylphenyl)prop-2-yn-1-one (1i)

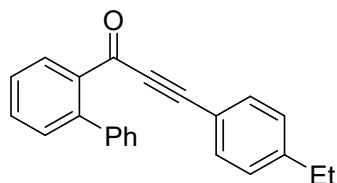

The product purified by flash column chromatography on silica gel (PE/AcOEt = 10:1) to afford the raw material as a yellow solid (287.81 mg, 93% yield). **<sup>1</sup>H NMR (600 MHz, CDCl<sub>3</sub>)**  $\delta$  7.95 (dd, *J* = 7.8, 1.1 Hz, 1H), 7.55 (td, *J* = 7.5, 1.3 Hz, 1H), 7.46 – 7.37 (m, 6H), 7.35 – 7.29 (m, 1H), 7.16 (d, *J* = 8.2 Hz, 2H), 7.08 (d, *J* = 8.2 Hz, 2H), 2.60 (q, *J* = 7.6 Hz, 2H), 1.18 (t, *J* = 7.6 Hz, 3H). **<sup>13</sup>C NMR (151 MHz, CDCl<sub>3</sub>)**  $\delta$  180.7, 147.3,

142.7, 140.5, 138.1, 133.1, 132.0, 131.0, 130.0, 129.5, 128.3, 127.9, 127.8, 127.4, 117.2, 94.6, 88.8, 29.0, 15.1.

**1-(2'-methyl-[1,1'-biphenyl]-2-yl)-3-phenylprop-2-yn-1-one (1q)**

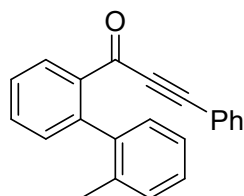

The product purified by flash column chromatography on silica gel (PE/AcOEt = 10:1) to afford the raw material as a yellow liquid (275.7 mg, 91% yield). **<sup>1</sup>H NMR (600 MHz, CDCl<sub>3</sub>)** δ 8.09 (dd, J = 7.8, 1.2 Hz, 1H), 7.58 (td, J = 7.5, 1.4 Hz, 1H), 7.49 (td, J = 7.6, 1.3 Hz, 1H), 7.38 – 7.33 (m, 3H), 7.31 – 7.27 (m, 3H), 7.23 – 7.19 (m, 3H), 7.18 – 7.15 (m, 1H), 2.15 (s, 3H). **<sup>13</sup>C NMR (151 MHz, CDCl<sub>3</sub>)** δ 179.5, 142.4, 140.3, 137.3, 135.8, 132.9, 132.3, 131.3, 130.4, 130.3, 129.9, 129.6, 128.3, 127.8, 127.4, 125.6, 120.2, 93.2, 88.3, 20.3.

**1-(2',5'-dimethyl-[1,1'-biphenyl]-2-yl)-3-phenylprop-2-yn-1-one (1w)**

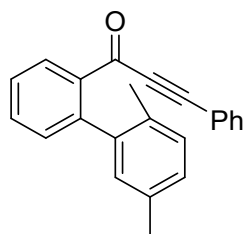

The product purified by flash column chromatography on silica gel (PE/AcOEt = 10:1) to afford the raw material as a yellow liquid (287.81 mg, 93% yield). **<sup>1</sup>H NMR (600 MHz, CDCl<sub>3</sub>)** δ 8.06 (dd, J = 7.8, 1.1 Hz, 1H),

7.58 (td,  $J = 7.5, 1.4$  Hz, 1H), 7.48 (td,  $J = 7.7, 1.2$  Hz, 1H), 7.40 – 7.37 (m, 1H), 7.35 – 7.32 (m, 2H), 7.33 – 7.26 (m, 3H), 7.10 (d,  $J = 7.7$  Hz, 1H), 7.05 – 6.99 (m, 2H), 2.29 (s, 3H), 2.10 (s, 3H).  $^{13}\text{C}$  NMR (151 MHz,  $\text{CDCl}_3$ )  $\delta$  179.7, 142.6, 140.1, 137.5, 134.9, 132.8, 132.8, 132.2, 131.3, 130.3, 130.0, 129.8, 128.6, 128.3, 127.3, 120.3, 93.2, 88.3, 20.9, 19.7.

**1-(3',5'-dimethyl-[1,1'-biphenyl]-2-yl)-3-phenylprop-2-yn-1-one (1x)**

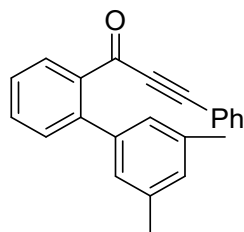

The product purified by flash column chromatography on silica gel (PE/AcOEt = 10:1) to afford the raw material as a yellow liquid (303.88 mg, 98% yield).  $^1\text{H}$  NMR (600 MHz,  $\text{CDCl}_3$ )  $\delta$  7.91 (d,  $J = 7.8$  Hz, 1H), 7.54 – 7.49 (m, 1H), 7.43 – 7.36 (m, 2H), 7.31 (t,  $J = 7.0$  Hz, 1H), 7.25 – 7.17 (m, 4H), 7.01 (s, 2H), 6.92 (s, 1H), 2.29 (s, 6H).  $^{13}\text{C}$  NMR (151 MHz,  $\text{CDCl}_3$ )  $\delta$  180.8, 143.2, 140.5, 138.2, 137.8, 132.8, 132.1, 130.9, 130.4, 129.8, 129.6, 128.3, 127.5, 127.2, 120.3, 93.6, 88.9, 21.3.

**2'-Phenyl-3'-((trifluoromethyl)thio)-4'*H*-spiro[cyclohexane-1,1'-naphthalene]-2,5-diene-4,4'-dione (3a)<sup>1</sup>**



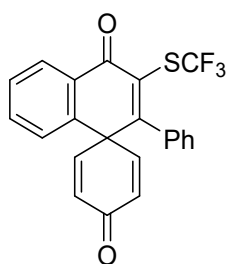

The product purified by flash column chromatography on silica gel (PE/AcOEt = 7:1) to afford the **3a** as a yellow solid (65.26 mg, 82% yield).  $^1\text{H}$  NMR (400 MHz,  $\text{CDCl}_3$ )  $\delta$  8.36 (dd,  $J = 7.7, 1.3$  Hz, 1H), 7.67 – 7.57 (m, 2H), 7.36 (ddd,  $J = 16.1, 7.8, 2.3$  Hz, 3H), 7.30 – 7.27 (m, 1H), 7.01 (d,  $J = 6.9$  Hz, 2H), 6.75 (d,  $J = 10.0$  Hz, 2H), 6.35 (d,  $J = 10.0$  Hz, 2H).  $^{13}\text{C}$  NMR (101 MHz,  $\text{CDCl}_3$ )  $\delta$  184.2, 179.2, 166.7, 147.16, 137.5, 135.9, 134.0, 130.6, 129.9, 129.8, 129.4, 129.2, 128.7, 128.6 (q,  $J = 308.1$  Hz), 128.1, 127.8, 127.3, 52.6.  $^{19}\text{F}$  NMR (376 MHz,  $\text{CDCl}_3$ )  $\delta$  -39.46 (s). The characterization data matched the literature.<sup>1</sup>

**2'-(*o*-Tolyl)-3'-((trifluoromethyl)thio)-4'*H*-spiro[cyclohexane-1,1'-naphthalene]-2,5-diene-4,4'-dione (3b)<sup>1</sup>**

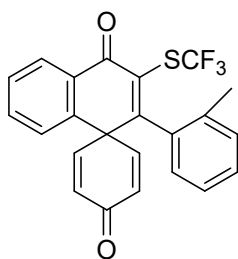

The product purified by flash column chromatography on silica gel (PE/AcOEt = 7:1) to afford the **3b** as a yellow solid (49.01 mg, 62% yield).  $^1\text{H}$

**NMR (400 MHz, CDCl<sub>3</sub>)**  $\delta$  8.29 (dd,  $J = 7.7, 1.5$  Hz, 1H), 7.54 (dq,  $J = 14.8, 7.4, 1.4$  Hz, 2H), 7.24 – 7.18 (m, 2H), 7.14 (d,  $J = 7.5$  Hz, 1H), 7.05 (t,  $J = 7.5$  Hz, 1H), 6.81 (d,  $J = 7.7$  Hz, 1H), 6.74 (dd,  $J = 10.0, 3.1$  Hz, 1H), 6.65 (dd,  $J = 9.9, 3.1$  Hz, 1H), 6.34 (dd,  $J = 9.9, 1.6$  Hz, 1H), 6.20 (dd,  $J = 10.0, 1.6$  Hz, 1H), 2.09 (s, 3H). **<sup>13</sup>C NMR (101 MHz, CDCl<sub>3</sub>)**  $\delta$  183.0, 178.0, 164.3, 146.8, 144.9, 137.1, 133.7, 133.0, 132.8, 130.1, 129.7, 129.5, 129.4, 128.8 (q,  $J = 317.1$ Hz), 128.4, 128.3, 127.7, 126.9, 126.3, 126.1, 123.8, 52.3, 19.2. **<sup>19</sup>F NMR (376 MHz, CDCl<sub>3</sub>)**  $\delta$  -38.18 (s). The characterization data matched the literature.<sup>1</sup>

**2'-(3-Bromophenyl)-3'-((trifluoromethyl)thio)-4'*H*-spiro[cyclohexane-1,1'-naphthalene]-2,5-diene-4,4'-dione (3c)<sup>1</sup>**

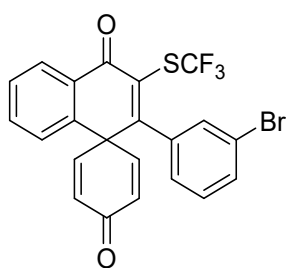

The product purified by flash column chromatography on silica gel (PE/AcOEt = 7:1) to afford the **3c** as a yellow solid (48.41 mg, 51% yield). **<sup>1</sup>H NMR (400 MHz, CDCl<sub>3</sub>)**  $\delta$  8.33 (dd,  $J = 7.8, 1.3$  Hz, 1H), 7.62 (dtd,  $J = 25.0, 7.5, 1.3$  Hz, 2H), 7.53 (dd,  $J = 8.1, 0.7$  Hz, 1H), 7.31 – 7.17 (m, 3H), 6.97 (d,  $J = 7.7$  Hz, 1H), 6.75 (t,  $J = 8.5$  Hz, 2H), 6.40 (t,  $J = 10.4$  Hz, 2H).

**<sup>13</sup>C NMR (101 MHz, CDCl<sub>3</sub>) δ** 183.9, 178.9, 164.8, 146.8, 146.7, 137.5, 137.3, 134.2, 132.3, 130.8, 130.3, 130.3, 129.7, 129.5, 129.4, 128.7, 128.4 (q, *J* = 311.06 Hz), 128.1, 126.0, 121.9, 52.4. **<sup>19</sup>F NMR (376 MHz, CDCl<sub>3</sub>) δ** -39.32 (s). The characterization data matched the literature.<sup>1</sup>

**2'-(3,5-Dimethylphenyl)-3'-((trifluoromethyl)thio)-4'*H*-spiro[cyclohexane-1,1'-naphthalene]-2,5-diene-4,4'-dione (3d)<sup>1</sup>**

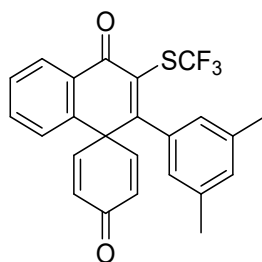

The product purified by flash column chromatography on silica gel (PE/AcOEt = 7:1) to afford the **3d** as a yellow solid (65.55 mg, 77% yield). **<sup>1</sup>H NMR (400 MHz, CDCl<sub>3</sub>) δ** 8.27 (dd, *J* = 7.7, 1.4 Hz, 1H), 7.52 (dtd, *J* = 20.7, 7.4, 1.4 Hz, 2H), 7.21 (dd, *J* = 7.8, 0.8 Hz, 1H), 6.92 (s, 1H), 6.70 – 6.62 (m, 2H), 6.52 (s, 2H), 6.32 – 6.21 (m, 2H), 2.21 (s, 6H). **<sup>13</sup>C NMR (101 MHz, CDCl<sub>3</sub>) δ** 183.3, 178.3, 166.0, 146.3, 136.5, 136.4, 134.9, 132.9, 129.8, 129.3, 128.9, 128.8 (q, *J* = 317.1 Hz), 128.3, 127.6, 127.0, 123.8, 51.6, 20.3. **<sup>19</sup>F NMR (376 MHz, CDCl<sub>3</sub>) δ** -39.46 (s). The characterization data matched the literature.<sup>1</sup>

**2'-(*m*-Tolyl)-3'-((trifluoromethyl)thio)-4'*H*-spiro[cyclohexane-1,1'-naphthalene]-2,5-diene-4,4'-dione (3e)<sup>1</sup>**

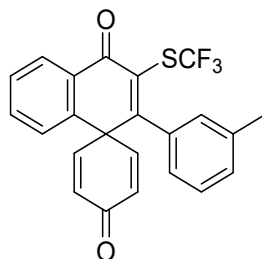

The product purified by flash column chromatography on silica gel (PE/AcOEt = 7:1) to afford the **3e** as a yellow solid (45.71 mg, 56% yield). <sup>1</sup>H NMR (400 MHz, CDCl<sub>3</sub>) δ 8.35 (dd, J = 7.7, 1.4 Hz, 1H), 7.60 (ddd, J = 13.0, 7.5, 1.4 Hz, 2H), 7.25 (ddd, J = 29.6, 10.3, 2.9 Hz, 3H), 6.80 (d, J = 6.0 Hz, 2H), 6.74 (d, J = 10.0 Hz, 2H), 6.35 (d, J = 10.3 Hz, 2H), 2.33 (s, 3H). <sup>13</sup>C NMR (101 MHz, CDCl<sub>3</sub>) δ 184.3, 179.3, 166.9, 147.2, 137.59, 137.56, 135.9, 133.9, 130.4, 129.9, 129.4, 128.72, 128.7 (q, J = 317.1 Hz), 128.1, 127.78, 127.73, 124.3, 52.6, 21.4. <sup>19</sup>F NMR (376 MHz, CDCl<sub>3</sub>) δ -39.46 (s) The characterization data matched the literature.<sup>1</sup>

**2'-(3-methoxyphenyl)-3'-((trifluoromethyl)thio)-4'*H*-spiro[cyclohexane-1,1'-naphthalene]-2,5-diene-4,4'-dione (3f)**

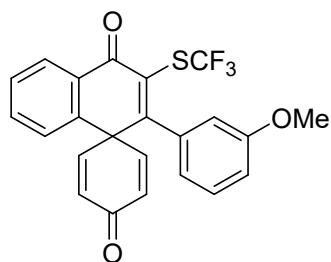

The product purified by flash column chromatography on silica gel (PE/

AcOEt = 4:1) to afford the **3f** as a yellow solid (67.62 mg, 79% yield). <sup>1</sup>H NMR (400 MHz, CDCl<sub>3</sub>) δ 8.35 – 8.33 (m, 1H), 7.63 – 7.57 (m, 2H), 7.30 – 7.24 (m, 2H), 6.98 – 6.87 (m, 1H), 6.73 – 6.74 (m, 2H), 6.59 – 6.57 (m, 2H), 6.36 (t, *J* = 9.2 Hz, 2H), 3.77 (d, *J* = 3.1 Hz, 3H). <sup>13</sup>C NMR (101 MHz, CDCl<sub>3</sub>) δ 184.3, 179.2, 166.4, 158.8, 147.2, 137.5, 137.1, 134.0, 130.5, 129.9, 129.7, 129.4, 129.1, 128.7, 128.6 (q, *J* = 311.75 Hz), 128.0, 119.6, 114.0, 113.7, 55.3, 52.5. <sup>19</sup>F NMR (377 MHz, CDCl<sub>3</sub>) δ -39.39 (d, *J* = 2.1 Hz). HRMS (ESI) calcd for C<sub>23</sub>H<sub>15</sub>F<sub>3</sub>NaO<sub>3</sub>S [M+Na]<sup>+</sup> 451.0586, found 451.0592.

**2'-(4-Fluorophenyl)-3'-((trifluoromethyl)thio)-4'*H*-spiro[cyclohexane-1,1'-naphthalene]-2,5-diene-4,4'-dione (3g)<sup>1</sup>**

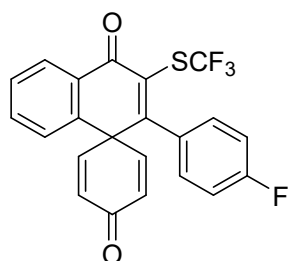

The product purified by flash column chromatography on silica gel (PE/AcOEt = 7:1) to afford the **3g** as a yellow solid (55.7 mg, 67% yield). <sup>1</sup>H NMR (600 MHz, CDCl<sub>3</sub>) δ 8.26 (d, *J* = 7.1 Hz, 1H), 7.59 – 7.54 (m, 1H), 7.51 (t, *J* = 7.2 Hz, 1H), 7.22 (d, *J* = 7.8 Hz, 1H), 6.99 – 6.93 (m, 4H), 6.67 (d, *J* = 9.9 Hz, 2H), 6.30 (d, *J* = 9.9 Hz, 2H). <sup>13</sup>C NMR (151 MHz, CDCl<sub>3</sub>) δ 182.9, 178.0, 164.7, 161.87 (d, *J* = 249.9 Hz), 145.9, 136.4, 133.1, 130.8 (d, *J* = 3.4 Hz), 129.7, 129.4, 128.8 (q, *J* = 317.1 Hz), 128.7, 128.46 (dd, *J*

= 16.5, 7.8 Hz), 127.7, 127.1, 126.4, 114.18 (d,  $J = 22.0$  Hz), 51.6.  $^{19}\text{F}$  NMR (376 MHz,  $\text{CDCl}_3$ )  $\delta$  -39.42 (s), -110.99 (s). The characterization data matched the literature.<sup>1</sup>

$\delta$  163.70 (d,  $J = 305.4$  Hz), 130.87 (d,  $J = 3.4$  Hz), 114.18 (d,  $J = 22.0$  Hz).

**2'-(4-Chlorophenyl)-3'-((trifluoromethyl)thio)-4'*H*-spiro[cyclohexane-1,1'-naphthalene]-2,5-diene-4,4'-dione (3h)**<sup>1</sup>

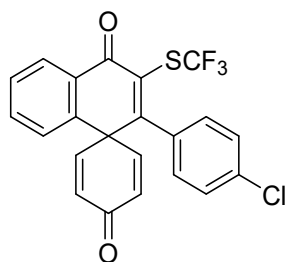

The product purified by flash column chromatography on silica gel (PE/AcOEt = 7:1) to afford the **3h** as a yellow solid (49.65 mg, 58% yield).  $^1\text{H}$  NMR (400 MHz,  $\text{CDCl}_3$ )  $\delta$  8.33 (dd,  $J = 7.7, 1.1$  Hz, 1H), 7.62 (tdd,  $J = 15.0, 10.8, 4.0$  Hz, 2H), 7.31 (dd,  $J = 17.6, 8.0$  Hz, 3H), 6.97 (d,  $J = 8.4$  Hz, 2H), 6.74 (d,  $J = 10.0$  Hz, 2H), 6.38 (d,  $J = 10.0$  Hz, 2H).  $^{13}\text{C}$  NMR (101 MHz,  $\text{CDCl}_3$ )  $\delta$  183.9, 179.0, 165.5, 146.8, 137.3, 135.4, 134.2, 134.1, 130.8, 130.2, 129.7, 129.5, 128.8, 128.7, 128.6 (q,  $J = 317.1$  Hz), 128.2, 128.1, 52.5.  $^{19}\text{F}$  NMR (376 MHz,  $\text{CDCl}_3$ )  $\delta$  -39.40 (s). The characterization data matched the literature.<sup>1</sup>

**2'-(4-Ethylphenyl)-3'-((trifluoromethyl)thio)-4'*H*-spiro[cyclohexane-**

### 1,1'-naphthalene]-2,5-diene-4,4'-dione (**3i**)<sup>1</sup>

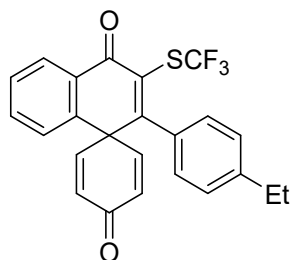

The product purified by flash column chromatography on silica gel (PE/AcOEt = 7:1) to afford the **3i** as a yellow solid (66.38 mg, 78% yield). <sup>1</sup>H NMR (400 MHz, CDCl<sub>3</sub>) δ 8.35 (dd, J = 7.7, 1.5 Hz, 1H), 7.60 (ddd, J = 12.9, 7.5, 1.4 Hz, 2H), 7.28 (dd, J = 7.8, 0.8 Hz, 1H), 7.16 (d, J = 8.1 Hz, 2H), 6.91 (d, J = 8.1 Hz, 2H), 6.74 (d, J = 10.0 Hz, 2H), 6.35 (d, J = 10.0 Hz, 2H), 2.66 (t, J = 7.6 Hz, 2H), 1.26 (d, J = 7.6 Hz, 3H). <sup>13</sup>C NMR (101 MHz, CDCl<sub>3</sub>) δ 184.3, 179.3, 147.3, 145.3, 137.5, 133.9, 133.3, 130.5, 129.9, 129.3, 128.7, 128.6 (q, J = 311.06 Hz), 128.1, 127.2, 127.1, 52.8, 28.5, 14.8. <sup>19</sup>F NMR (376 MHz, CDCl<sub>3</sub>) δ -39.50 (s). The characterization data matched the literature.<sup>1</sup>

### 2'-(4-Methoxyphenyl)-3'-((trifluoromethyl)thio)-4'H-spiro[cyclohexane-1,1'-naphthalene]-2,5-diene-4,4'-dione (**3j**)<sup>1</sup>

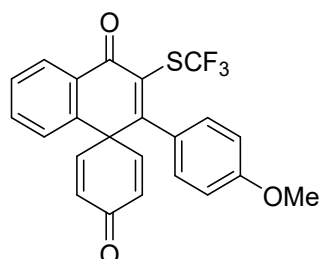

The product purified by flash column chromatography on silica gel (PE/AcOEt = 5:1) to afford the **3j** as a yellow solid 68.4 mg, 80% yield). **<sup>1</sup>H NMR (400 MHz, CDCl<sub>3</sub>)** δ 8.33 (dd, *J* = 7.8, 1.4 Hz, 1H), 7.59 (dtd, *J* = 23.5, 7.4, 1.3 Hz, 2H), 7.33 – 7.23 (m, 1H), 6.96 (d, *J* = 8.7 Hz, 2H), 6.88 – 6.83 (m, 2H), 6.74 (t, *J* = 6.4 Hz, 2H), 6.37 (t, *J* = 6.4 Hz, 2H), 3.82 (s, 3H). **<sup>13</sup>C NMR (101 MHz, CDCl<sub>3</sub>)** δ 184.3, 179.4, 166.8, 160.0, 147.4, 137.6, 133.9, 130.5, 130.2, 130.0, 129.9, 129.5 (q, *J* = 311.03 Hz), 129.3, 128.7, 128.6, 128.4, 128.1, 113.2, 55.2, 52.9. **<sup>19</sup>F NMR (376 MHz, CDCl<sub>3</sub>)** δ -39.54 (s). The characterization data matched the literature.<sup>1</sup>

**2'-(4-butylphenyl)-3'-((trifluoromethyl)thio)-4'*H*-spiro[cyclohexane-1,1'-naphthalene]-2,5-diene-4,4'-dione (3k)**

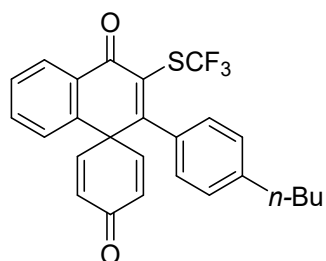

The product purified by flash column chromatography on silica gel (PE/AcOEt = 4:1) to afford the **3k** as a yellow solid (65.33mg, 72% yield). **<sup>1</sup>H NMR (400 MHz, CDCl<sub>3</sub>)** δ 8.34 (dd, *J* = 7.7, 1.2 Hz, 1H), 7.65 – 7.49 (m, 2H), 7.31 – 7.27 (m, 1H), 7.13 (d, *J* = 8.0 Hz, 2H), 6.90 (d, *J* = 8.0 Hz, 2H), 6.73 (d, *J* = 10.0 Hz, 2H), 6.35 (d, *J* = 10.0 Hz, 2H), 2.67 – 2.51 (m, 2H), 1.60 (dd, *J* = 15.6, 8.1 Hz, 2H), 1.34 (dt, *J* = 14.5, 7.4 Hz, 2H), 0.93 (t, *J* = 7.3 Hz, 3H). **<sup>13</sup>C NMR (101 MHz, CDCl<sub>3</sub>)** δ 184.3, 179.3, 167.0, 147.3,



144.1, 137.6, 133.9, 133.3, 130.5, 129.9, 129.7, 129.3, 128.9 (q,  $J = 306.06$  Hz), 128.7, 128.1, 127.7, 127.1, 52.8, 35.3, 33.1, 22.4, 13.9.  $^{19}\text{F}$  NMR (377 MHz,  $\text{CDCl}_3$ )  $\delta$  -39.50 (d,  $J = 6.5$  Hz). HRMS (ESI) calcd for  $\text{C}_{26}\text{H}_{21}\text{O}_2\text{NaSF}_3$   $[\text{M}+\text{Na}]^+$  477.1107, found 477.1111.

**2'-(Thiophen-2-yl)-3'-((trifluoromethyl)thio)-4'H-spiro[cyclohexane-1,1'-naphthalene]-2,5-diene-4,4'-dione (3l)<sup>1</sup>**

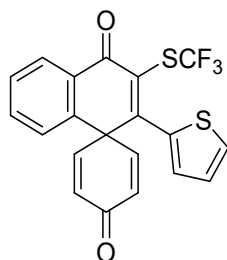

The product purified by flash column chromatography on silica gel (PE/AcOEt = 7:1) to afford the **3l** as a yellow solid (60.61 mg, 75% yield).  $^1\text{H}$  NMR (400 MHz,  $\text{CDCl}_3$ )  $\delta$  8.27 (dd,  $J = 7.8, 1.4$  Hz, 1H), 7.53 (dtd,  $J = 22.4, 7.4, 1.4$  Hz, 2H), 7.36 (dd,  $J = 5.1, 1.1$  Hz, 1H), 7.26 – 7.21 (m, 1H), 6.96 (dd,  $J = 5.0, 3.6$  Hz, 1H), 6.86 (dd,  $J = 3.6, 1.0$  Hz, 1H), 6.67 – 6.60 (m, 2H), 6.40 – 6.33 (m, 2H).  $^{13}\text{C}$  NMR (101 MHz,  $\text{CDCl}_3$ )  $\delta$  183.3, 177.8, 158.7, 146.0, 136.3, 134.5, 133.09, 129.9, 129.0 (q,  $J = 311.3$  Hz), 128.7, 128.4, 128.2, 127.7, 127.1, 125.8, 51.6.  $^{19}\text{F}$  NMR (376 MHz,  $\text{CDCl}_3$ )  $\delta$  -39.48 (s). The characterization data matched the literature.<sup>1</sup>

**2'-(Naphthalen-2-yl)-3'-((trifluoromethyl)thio)-4'H-spiro[cyclohexane-1,1'-naphthalene]-2,5-diene-4,4'-dione (3m)<sup>1</sup>**

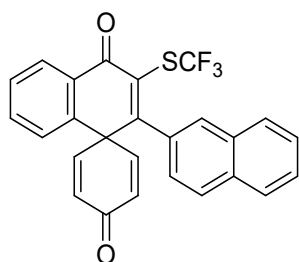

The product purified by flash column chromatography on silica gel (PE/AcOEt = 7:1) to afford the **3m** as a yellow solid (51 mg, 57% yield). **<sup>1</sup>H NMR (600 MHz, CDCl<sub>3</sub>)**  $\delta$  8.38 (d,  $J$  = 7.8 Hz, 1H), 7.86 (d,  $J$  = 7.7 Hz, 1H), 7.82 (d,  $J$  = 8.4 Hz, 1H), 7.79 (d,  $J$  = 7.6 Hz, 1H), 7.65 (t,  $J$  = 7.5 Hz, 1H), 7.60 (t,  $J$  = 7.6 Hz, 1H), 7.57 – 7.51 (m, 2H), 7.47 (s, 1H), 7.31 (d,  $J$  = 7.8 Hz, 1H), 7.13 (d,  $J$  = 8.4 Hz, 1H), 6.83 (d,  $J$  = 9.4 Hz, 2H), 6.34 (t,  $J$  = 9.4 Hz, 2H). **<sup>13</sup>C NMR (151 MHz, CDCl<sub>3</sub>)**  $\delta$  184.1, 179.3, 166.6, 147.2, 137.5, 135.9, 134.0, 133.4, 133.0, 132.0, 130.7, 130.5, 130.1, 130.0, 129.4, 128.8, 128.6 (q,  $J$  = 311.15 Hz), 128.3, 128.1, 127.8, 127.2, 127.0, 126.7, 124.8, 52.8. **<sup>19</sup>F NMR (565 MHz, CDCl<sub>3</sub>)**  $\delta$  -39.39 (s). The characterization data matched the literature.<sup>1</sup>

**7'-Fluoro-2'-phenyl-3'-((trifluoromethyl)thio)-4'*H*-spiro[cyclohexane-1,1'-naphthalene]-2,5-diene-4,4'-dione (3n)<sup>1</sup>**

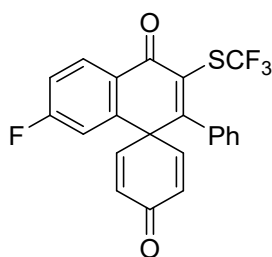

The product purified by flash column chromatography on silica gel (PE/AcOEt = 7:1) to afford the **3n** as a yellow solid (68.33 mg, 84% yield). **<sup>1</sup>H NMR (400 MHz, CDCl<sub>3</sub>)** δ 8.38 (dd, J = 8.8, 5.8 Hz, 1H), 7.43 – 7.31 (m, 3H), 7.27 (td, J = 8.4, 2.5 Hz, 1H), 7.04 – 6.98 (m, 2H), 6.96 (dd, J = 9.1, 2.4 Hz, 1H), 6.78 – 6.71 (m, 2H), 6.40 – 6.32 (m, 2H). **<sup>13</sup>C NMR (101 MHz, CDCl<sub>3</sub>)** δ 183.7, 178.1, 167.2, 166.5, 164.6, 146.4, 140.7 (d, J = 8.5 Hz), 135.7, 131.9 (d, J = 9.6 Hz), 130.9, 129.3, 128.5 (q, J = 310.6 Hz), 127.9, 127.2, 126.5 (d, J = 2.6 Hz), 117.6, 117.4, 114.9, 114.7, 52.5 (d, J = 1.3 Hz). **<sup>19</sup>F NMR (377 MHz, CDCl<sub>3</sub>)** δ -39.43 (s), -101.77 (d, J = 2.9 Hz). The characterization data matched the literature.<sup>1</sup>

**7'-Methoxy-2'-phenyl-3'-((trifluoromethyl)thio)-4'-H-spiro[cyclohexane-1,1'-naphthalene]-2,5-diene-4,4'-dione (**3o**)<sup>1</sup>**

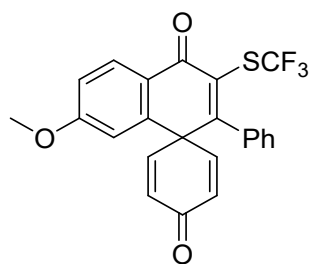

The product purified by flash column chromatography on silica gel (PE/AcOEt = 7:1) to afford the **3o** as a yellow solid (63.88 mg, 76% yield). **<sup>1</sup>H NMR (400 MHz, CDCl<sub>3</sub>)** δ 8.24 (d, J = 8.8 Hz, 1H), 7.27 (ddd, J = 16.1, 7.8, 3.7 Hz, 3H), 7.01 (dd, J = 8.8, 2.5 Hz, 1H), 6.94 – 6.90 (m, 2H), 6.68 (t, J = 6.4 Hz, 2H), 6.61 (d, J = 2.4 Hz, 1H), 6.27 (t, J = 6.4 Hz, 2H), 3.76

(d,  $J = 3.2$  Hz, 3H).  $^{13}\text{C}$  NMR (101 MHz,  $\text{CDCl}_3$ )  $\delta$  183.1, 177.2, 164.7, 163.0, 146.3, 138.9, 134.9, 130.2, 129.5, 128.6 (q,  $J = 311.06$  Hz), 128.0, 126.7, 126.3, 122.2, 114.6, 111.4, 54.7, 51.6.  $^{19}\text{F}$  NMR (376 MHz,  $\text{CDCl}_3$ )  $\delta$  -39.49 (s). The characterization data matched the literature.<sup>1</sup>

**2-Methyl-2'-phenyl-3'-((trifluoromethyl)thio)-4'*H*-spiro[cyclohexane-1,1'-naphthalene]-2,5-diene-4,4'-dione (3p)<sup>1</sup>**

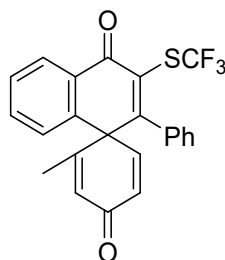

The product purified by flash column chromatography on silica gel (PE/AcOEt = 7:1) to afford the **3p** as a yellow solid (53.61 mg, 65% yield).  $^1\text{H}$  NMR (600 MHz,  $\text{CDCl}_3$ )  $\delta$  8.35 (dd,  $J = 7.9, 1.3$  Hz, 1H), 7.69 – 7.53 (m, 2H), 7.40 – 7.29 (m, 3H), 7.18 (d,  $J = 7.6$  Hz, 1H), 7.00 (s, 2H), 6.73 (d,  $J = 9.8$  Hz, 1H), 6.35 – 6.24 (m, 2H), 1.76 (d,  $J = 1.2$  Hz, 3H).  $^{13}\text{C}$  NMR (151 MHz,  $\text{CDCl}_3$ )  $\delta$  185.0, 179.4, 166.9, 155.7, 147.2, 138.7, 135.6, 134.3, 131.1, 130.8, 130.2, 129.7, 129.5, 129.3, 128.7 (q,  $J = 309.55$  Hz), 128.4, 127.8, 127.6, 55.8, 20.2.  $^{19}\text{F}$  NMR (565 MHz,  $\text{CDCl}_3$ )  $\delta$  -39.46 (s). The characterization data matched the literature.<sup>1</sup>

**3-Methyl-2'-phenyl-3'-((trifluoromethyl)thio)-4'*H*-spiro[cyclohexane-1,1'-naphthalene]-2,5-diene-4,4'-dione (3q)<sup>1</sup>**

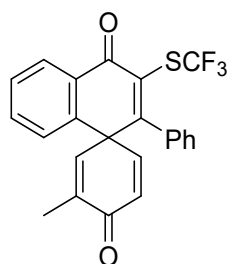

The product purified by flash column chromatography on silica gel (PE/AcOEt = 7:1) to afford the **3q** as a yellow solid (69.74 mg, 85% yield).  $^1\text{H}$  NMR (600 MHz,  $\text{CDCl}_3$ )  $\delta$  8.27 (dd,  $J = 7.8, 1.2$  Hz, 1H), 7.52 (dtd,  $J = 15.0, 7.8, 1.2$  Hz, 2H), 7.27 (dt,  $J = 14.4, 7.5$  Hz, 3H), 7.19 (s, 1H), 6.89 (dd,  $J = 21.5, 6.9$  Hz, 2H), 6.64 (dd,  $J = 9.8, 3.1$  Hz, 1H), 6.44 (dd,  $J = 2.9, 1.4$  Hz, 1H), 6.24 (d,  $J = 9.8$  Hz, 1H), 1.78 (d,  $J = 1.2$  Hz, 3H).  $^{13}\text{C}$  NMR (151 MHz,  $\text{CDCl}_3$ )  $\delta$  183.8, 178.3, 166.5, 145.6, 141.3, 137.3, 136.7, 134.9, 132.8, 129.4, 128.8, 128.6, 128.3, 128.1, 128.0, 127.6, 127.0, 126.7, 126.5, 126.0, 51.8, 14.7.  $^{19}\text{F}$  NMR (565 MHz,  $\text{CDCl}_3$ )  $\delta$  -39.79 (s). The characterization data matched the literature.<sup>1</sup>

**3-Methyl-2'-(*p*-tolyl)-3'-((trifluoromethyl)thio)-4'*H*-spiro[cyclohexane-1,1'-naphthalene]-2,5-diene-4,4'-dione (**3r**)<sup>1</sup>**

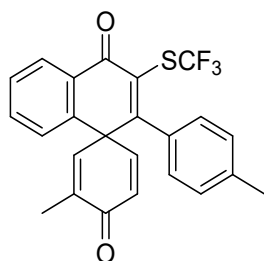

The product purified by flash column chromatography on silica gel (PE/AcOEt = 7:1) to afford the **3r** as a yellow solid (61.29 mg, 73% yield).  $^1\text{H}$

**NMR (600 MHz, CDCl<sub>3</sub>)**  $\delta$  8.33 (dd,  $J = 7.8, 1.2$  Hz, 1H), 7.60 (td,  $J = 7.6, 1.4$  Hz, 1H), 7.57 – 7.53 (m, 1H), 7.28 – 7.23 (m, 1H), 7.11 (d,  $J = 7.7$  Hz, 2H), 6.85 (d,  $J = 9.6$  Hz, 2H), 6.70 (dd,  $J = 9.8, 3.1$  Hz, 1H), 6.50 (dd,  $J = 2.9, 1.4$  Hz, 1H), 6.31 (d,  $J = 9.8$  Hz, 1H), 2.35 (s, 3H), 1.86 (d,  $J = 1.2$  Hz, 3H). **<sup>13</sup>C NMR (151 MHz, CDCl<sub>3</sub>)**  $\delta$  185.0, 179.4, 167.8, 146.8, 142.5, 139.0, 138.4, 137.7, 133.8, 133.2, 130.3, 129.9, 129.3, 129.1, 128.65 (q,  $J = 311.06$  Hz), 128.60, 128.4, 128.2, 128.1, 127.4, 126.9, 53.0, 21.3, 15.7. **<sup>19</sup>F NMR (565 MHz, CDCl<sub>3</sub>)**  $\delta$  -39.80 (s). The characterization data matched the literature.<sup>1</sup>

**2-Methoxy-2'-phenyl-3'-((trifluoromethyl)thio)-4'*H*-spiro[cyclohexane-1,1'-naphthalene]-2,5-diene-4,4'-dione (3s)<sup>1</sup>**

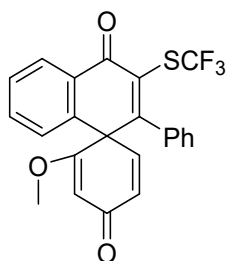

The product purified by flash column chromatography on silica gel (PE/AcOEt = 5:1) to afford the **3s** as a yellow solid (55.61 mg, 65% yield). **<sup>1</sup>H NMR (600 MHz, CDCl<sub>3</sub>)**  $\delta$  8.33 (dd,  $J = 7.8, 1.0$  Hz, 1H), 7.61 (td,  $J = 7.7, 1.4$  Hz, 1H), 7.57 (dd,  $J = 11.0, 4.1$  Hz, 1H), 7.38 – 7.31 (m, 3H), 7.24 (d,  $J = 7.8$  Hz, 1H), 7.05 – 6.88 (m, 2H), 6.47 (d,  $J = 9.7$  Hz, 1H), 6.30 (dd,  $J = 9.7, 0.8$  Hz, 1H), 5.60 (s, 1H), 3.59 (s, 3H). **<sup>13</sup>C NMR (151 MHz, CDCl<sub>3</sub>)**  $\delta$  186.7, 179.5, 172.3, 166.4, 142.8, 138.3, 135.6, 134.0, 130.38,

130.34, 129.28, 129.23, 128.6 (q,  $J = 311.06$  Hz), 128.4, 128.1, 127.8, 127.2, 126.9, 105.1, 56.1, 55.0.  $^{19}\text{F}$  NMR (565 MHz,  $\text{CDCl}_3$ )  $\delta$  -39.84 (s).

The characterization data matched the literature.<sup>1</sup>

**3-Methoxy-2'-phenyl-3'-((trifluoromethyl)thio)-4'*H*-**

**spiro[cyclohexane-1,1'-naphthalene]-2,5-diene-4,4'-dione (3t)<sup>1</sup>**

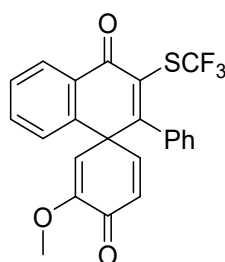

The product purified by flash column chromatography on silica gel (PE/AcOEt = 5:1) to afford the **3t** as a yellow solid (68.2 mg, 80% yield).  $^1\text{H}$  NMR (600 MHz,  $\text{CDCl}_3$ )  $\delta$  8.27 (d,  $J = 7.8$  Hz, 1H), 7.54 (td,  $J = 7.6, 1.5$  Hz, 1H), 7.49 (t,  $J = 7.2$  Hz, 1H), 7.27 (dt,  $J = 14.0, 7.7$  Hz, 3H), 7.23 – 7.21 (m, 1H), 6.94 – 6.87 (m, 2H), 6.66 (dd,  $J = 9.8, 2.7$  Hz, 1H), 6.29 (d,  $J = 9.7$  Hz, 1H), 5.61 (d,  $J = 2.7$  Hz, 1H), 3.55 (s, 3H).  $^{13}\text{C}$  NMR (151 MHz,  $\text{CDCl}_3$ )  $\delta$  179.4, 179.3, 167.9, 152.4, 147.2, 139.0, 135.8, 134.0, 130.4, 129.7, 129.2, 129.1, 128.65, 128.62 (q,  $J = 332.2$  Hz), 128.0, 127.8, 127.4, 127.2, 115.3, 55.2, 52.8.  $^{19}\text{F}$  NMR (565 MHz,  $\text{CDCl}_3$ )  $\delta$  -39.50 (s). The characterization data matched the literature.<sup>1</sup>

**2,3-Dimethoxy-2'-phenyl-3'-((trifluoromethyl)thio)-4'*H*-**

**spiro[cyclohexane-1,1'-naphthalene]-2,5-diene-4,4'-dione (3u)<sup>1</sup>**

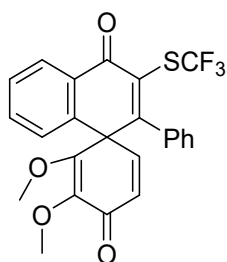

The product purified by flash column chromatography on silica gel (PE/AcOEt = 4:1) to afford the **3u** as a yellow solid (55.89 mg, 61% yield). <sup>1</sup>H NMR (600 MHz, CDCl<sub>3</sub>) δ 8.26 (dd, J = 7.8, 1.1 Hz, 1H), 7.56 – 7.46 (m, 2H), 7.34 – 7.24 (m, 3H), 7.20 (d, J = 7.3 Hz, 1H), 7.05 – 6.93 (m, 2H), 6.32 (d, J = 9.7 Hz, 1H), 6.21 (d, J = 9.7 Hz, 1H), 3.78 (s, 3H), 3.38 (s, 3H). <sup>13</sup>C NMR (151 MHz, CDCl<sub>3</sub>) δ 182.7, 178.5, 165.7, 158.2, 140.9, 138.8, 137.4, 134.6, 132.8, 129.5, 129.1, 128.5, 128.18, 128.16, 127.6 (q, J = 309.55 Hz), 127.5, 126.9, 126.7, 126.4, 126.1, 125.6, 60.2, 59.6, 55.8. <sup>19</sup>F NMR (565 MHz, CDCl<sub>3</sub>) δ -39.88 (s). The characterization data matched the literature.<sup>1</sup>

**2,5-dimethyl-2'-phenyl-3'-((trifluoromethyl)thio)-4'*H*-spiro[cyclohexane-1,1'-naphthalene]-2,5-diene-4,4'-dione (3v)**

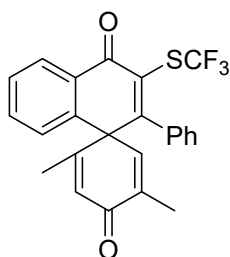

The product purified by flash column chromatography on silica gel (PE/AcOEt = 7:1) to afford the **3w** as a yellow solid (41.08 mg, 48% yield). <sup>1</sup>H



**NMR (600 MHz, CDCl<sub>3</sub>)**  $\delta$  8.35 (d,  $J$  = 7.8 Hz, 1H), 7.62 (t,  $J$  = 7.5 Hz, 1H), 7.56 (t,  $J$  = 7.5 Hz, 1H), 7.37 – 7.28 (m, 3H), 7.13 (d,  $J$  = 7.8 Hz, 1H), 6.93 (d,  $J$  = 6.8 Hz, 2H), 6.47 (s, 1H), 6.25 (s, 1H), 1.83 (s, 3H), 1.72 (s, 3H). **<sup>13</sup>C NMR (151 MHz, CDCl<sub>3</sub>)**  $\delta$  185.5, 179.5, 167.8, 155.1, 142.3, 139.5, 136.7, 135.6, 134.2, 131.1, 130.8, 130.4, 130.2, 129.1, 128.7 (q,  $J$  = 310.56 Hz), 128.4, 127.8, 127.6, 126.5, 56.1, 20.0, 15.3. **<sup>19</sup>F NMR (565 MHz, CDCl<sub>3</sub>)**  $\delta$  -39.55 (s). HRMS (ESI) calcd for C<sub>24</sub>H<sub>17</sub>F<sub>3</sub>NaO<sub>2</sub>S [M+Na]<sup>+</sup> 449.0794, found 449.0803.

**3,5-dimethyl-2'-phenyl-3'-((trifluoromethyl)thio)-4'H-spiro[cyclohexane-1,1'-naphthalene]-2,5-diene-4,4'-dione (3w)**

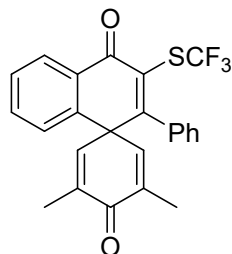

The product purified by flash column chromatography on silica gel (PE/AcOEt = 7:1) to afford the **3x** as a yellow solid (62.19 mg, 73% yield). **<sup>1</sup>H NMR (600 MHz, CDCl<sub>3</sub>)**  $\delta$  8.33 (d,  $J$  = 7.8 Hz, 1H), 7.59 (t,  $J$  = 7.5 Hz, 1H), 7.54 (t,  $J$  = 7.5 Hz, 1H), 7.35 – 7.28 (m, 3H), 7.23 (d,  $J$  = 7.8 Hz, 1H), 6.93 (d,  $J$  = 7.5 Hz, 2H), 6.49 (s, 2H), 1.83 (s, 6H). **<sup>13</sup>C NMR (151 MHz, CDCl<sub>3</sub>)**  $\delta$  185.4, 179.6, 168.5, 141.9, 139.2, 137.4, 136.1, 133.8, 129.8, 128.9, 128.7 (q,  $J$  = 310.56 Hz), 128.8, 128.5, 128.1, 127.4, 127.3, 52.5,

15.9.  $^{19}\text{F}$  NMR (565 MHz,  $\text{CDCl}_3$ )  $\delta$  -39.64 (s). HRMS (ESI) calcd for  $\text{C}_{24}\text{H}_{17}\text{F}_3\text{NaO}_2\text{S}$   $[\text{M}+\text{Na}]^+$  449.0794 , found 449.080

### References for known compounds:

[1] W.-C. Yang, M.-M. Zhang, Y. Sun, C.-Y. Chen, and L. Wang, *Org. Lett.*, 2021, **23**, 6691–6696

### 5 $^1\text{H}$ NMR , $^{13}\text{C}$ NMR and $^{19}\text{F}$ NMR of the products

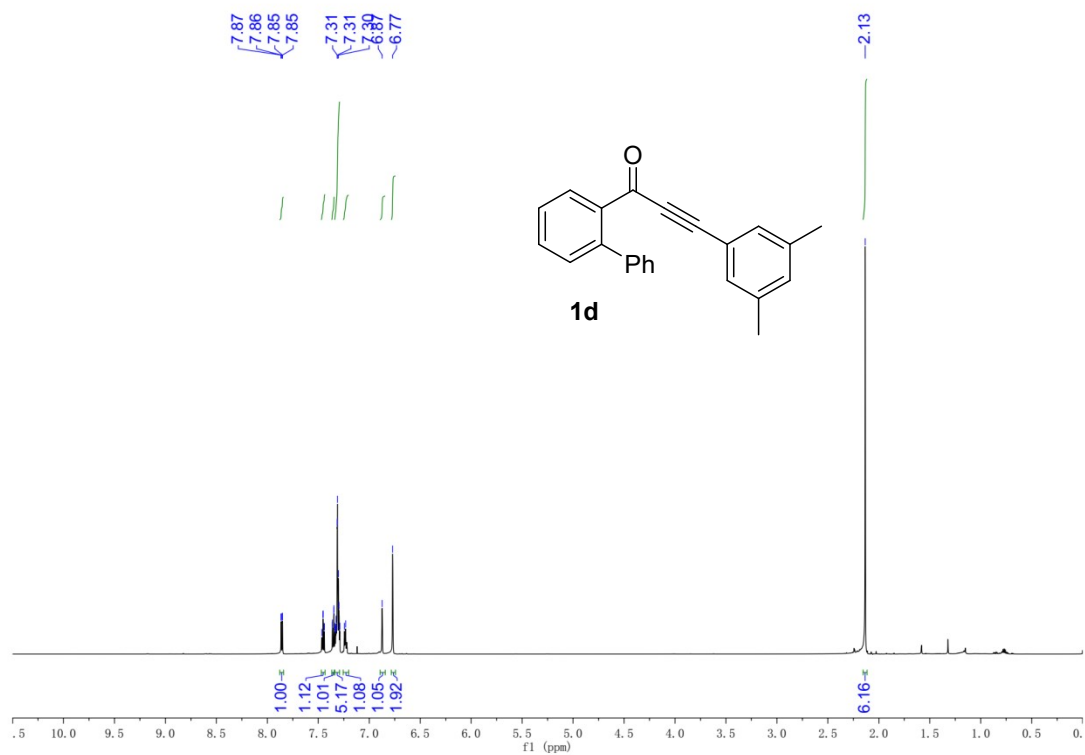

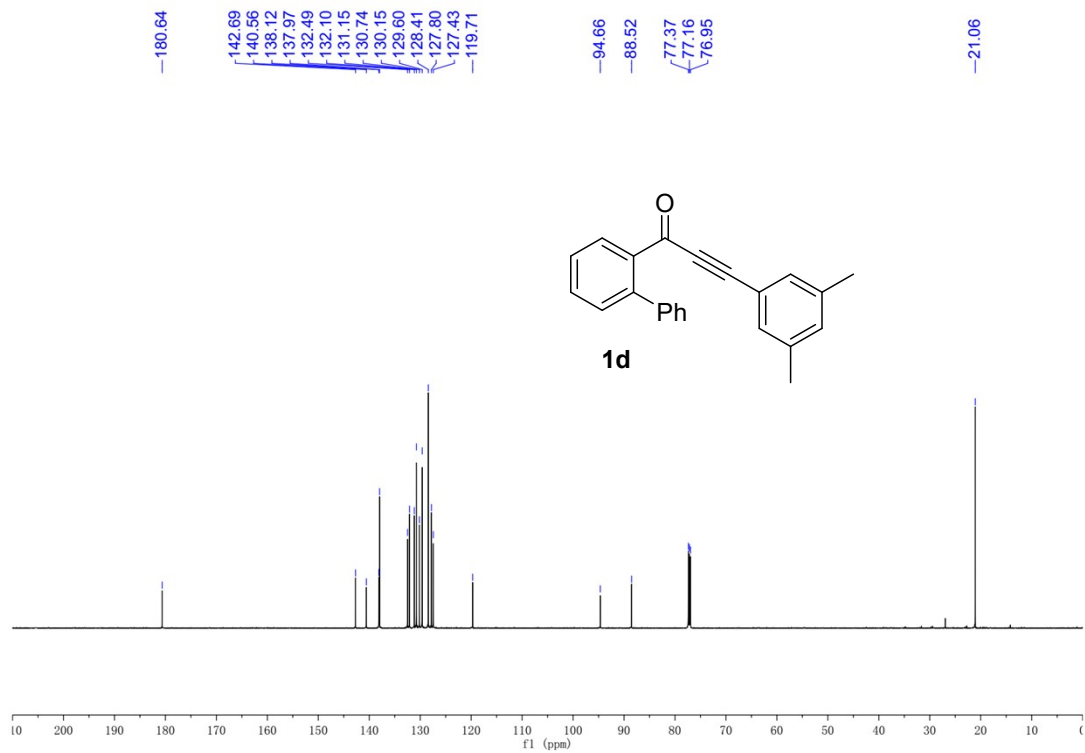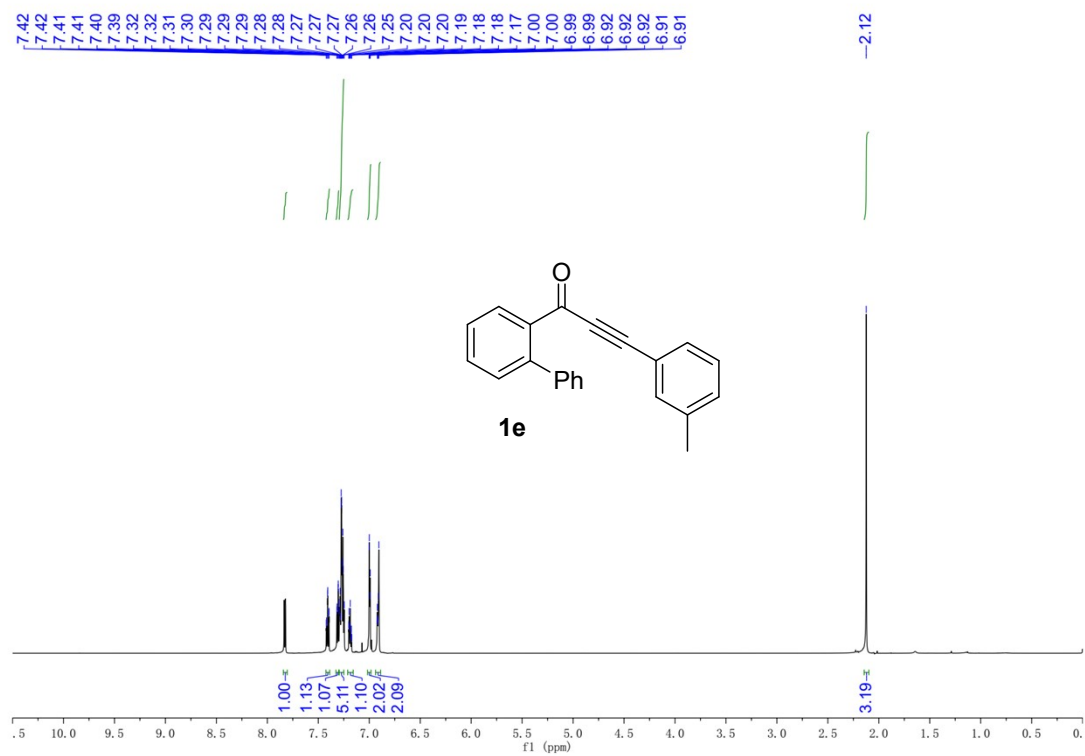

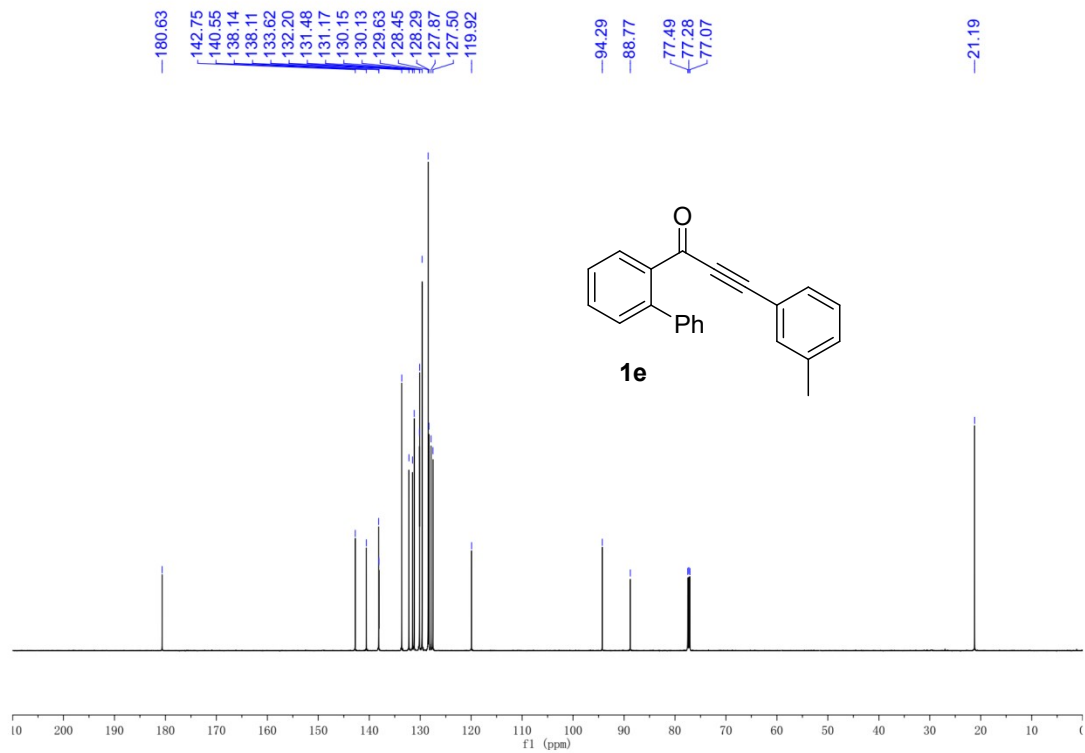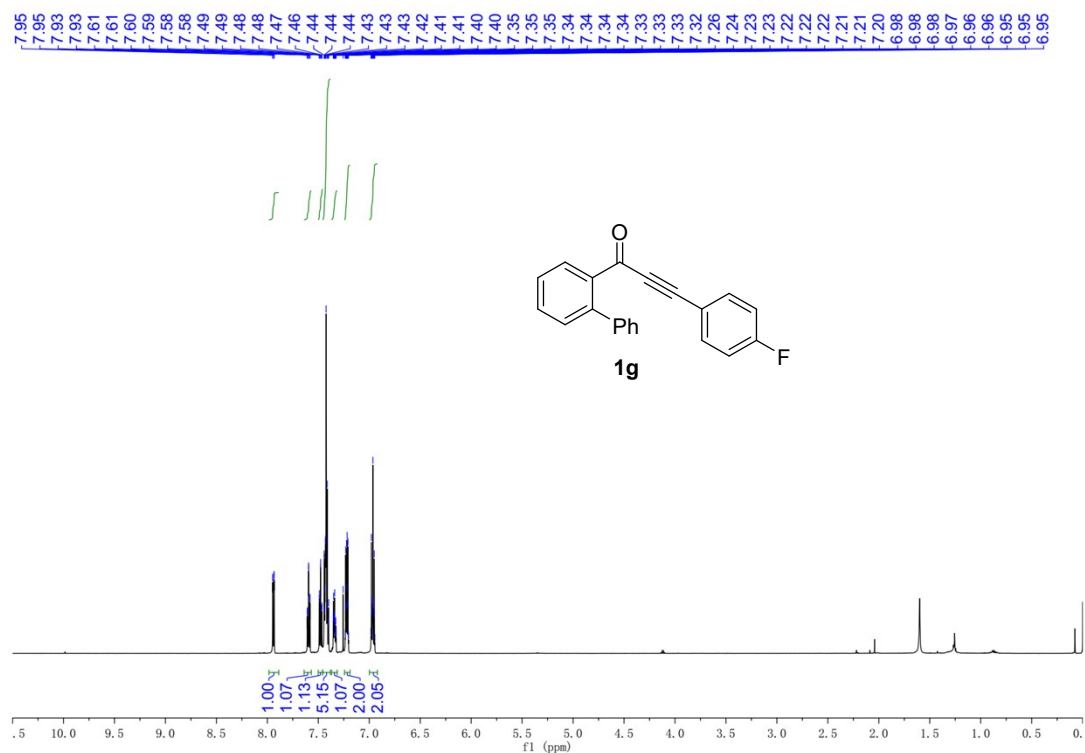

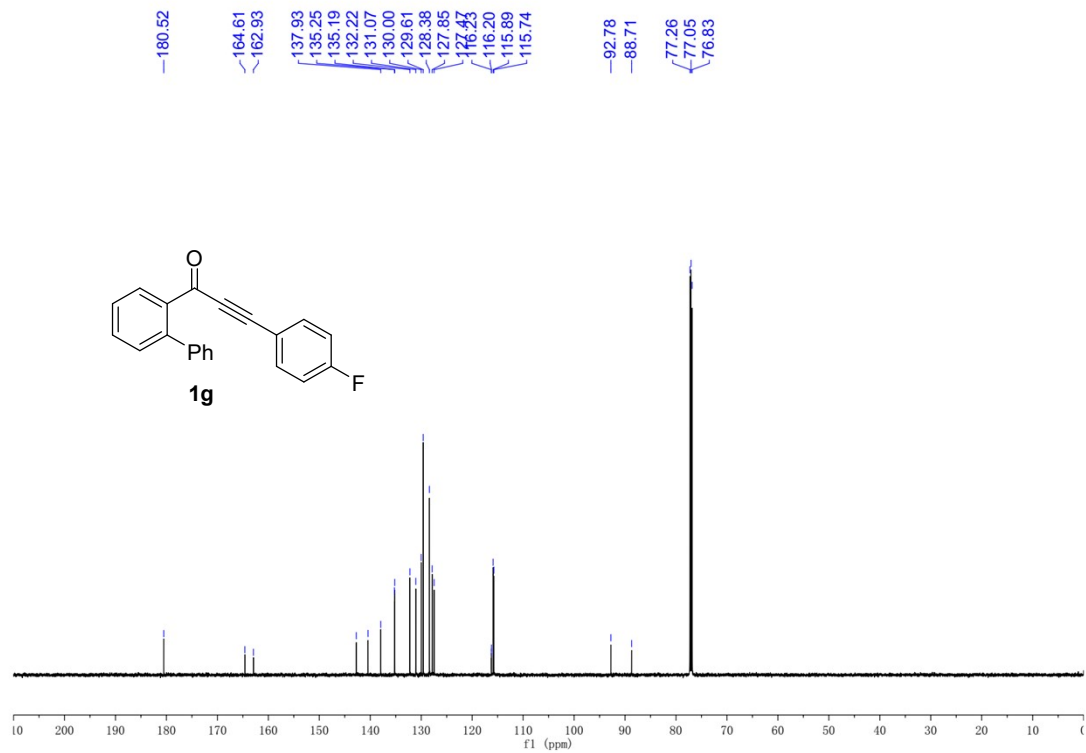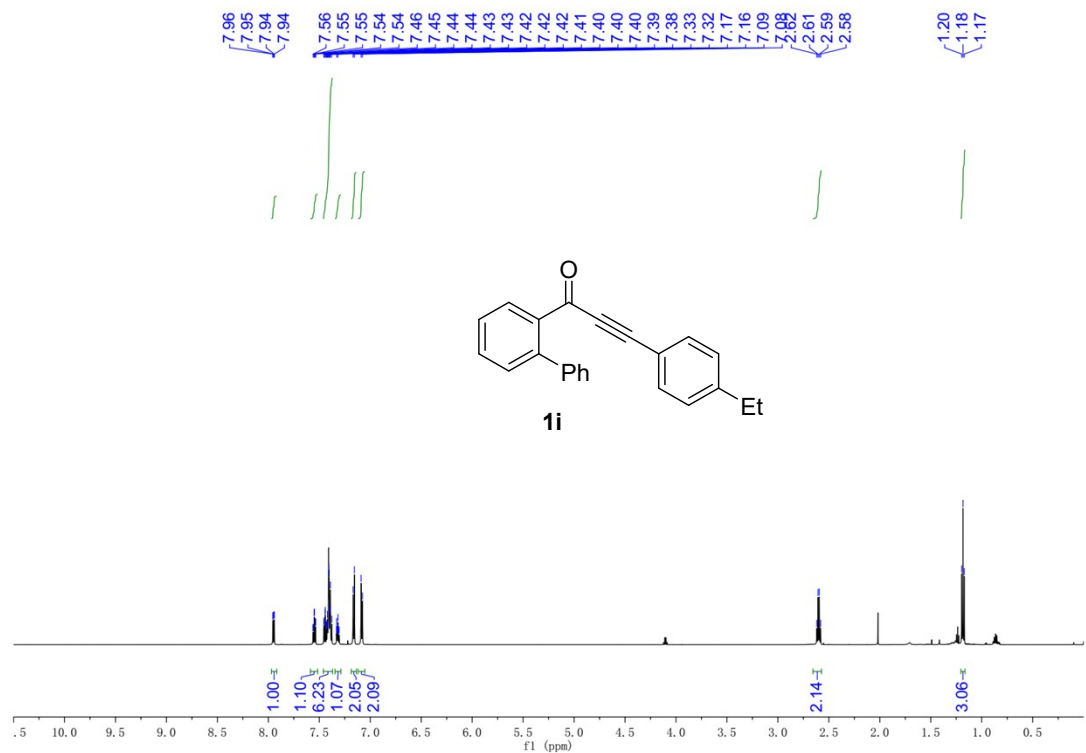

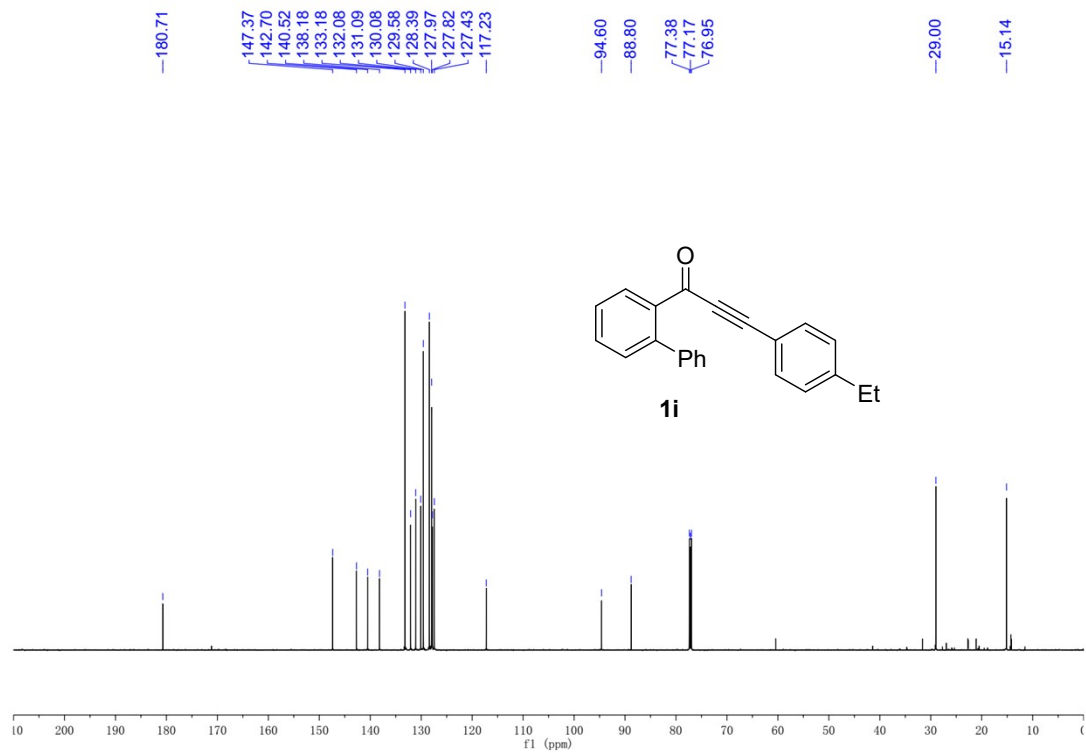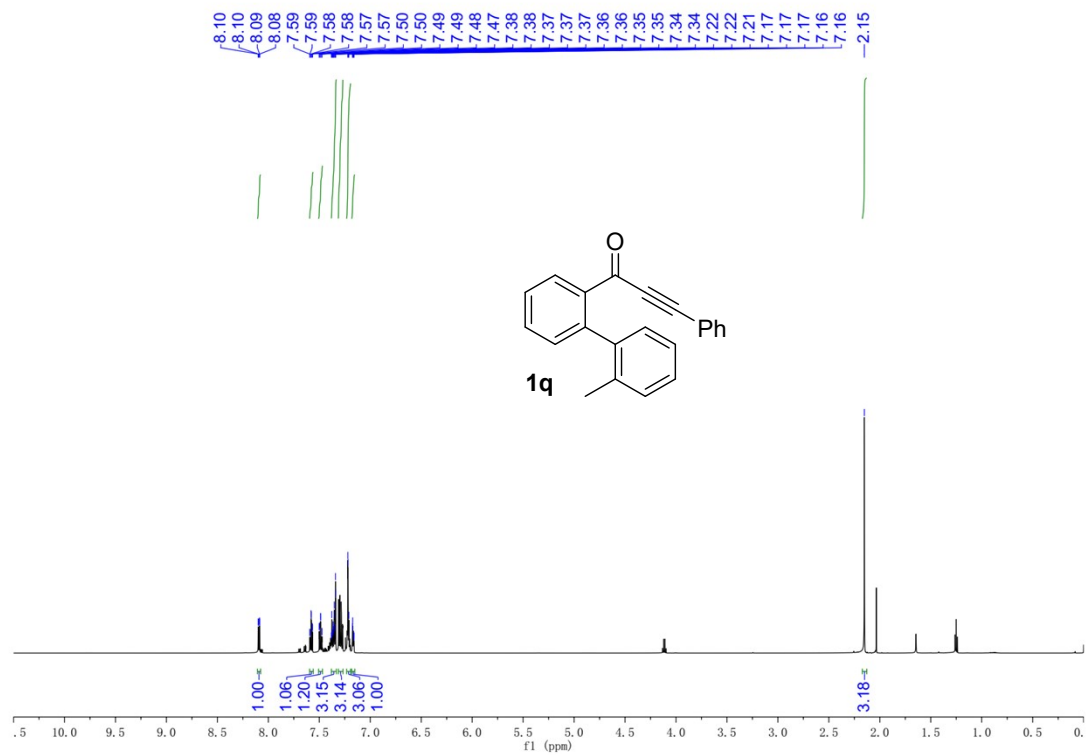

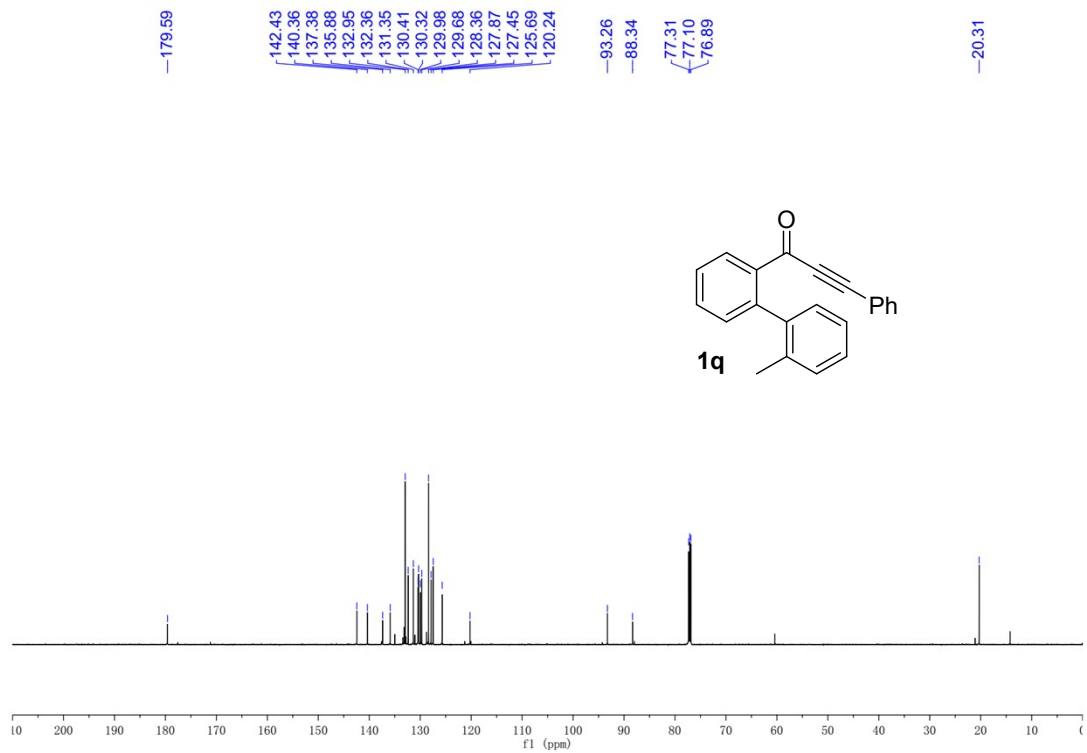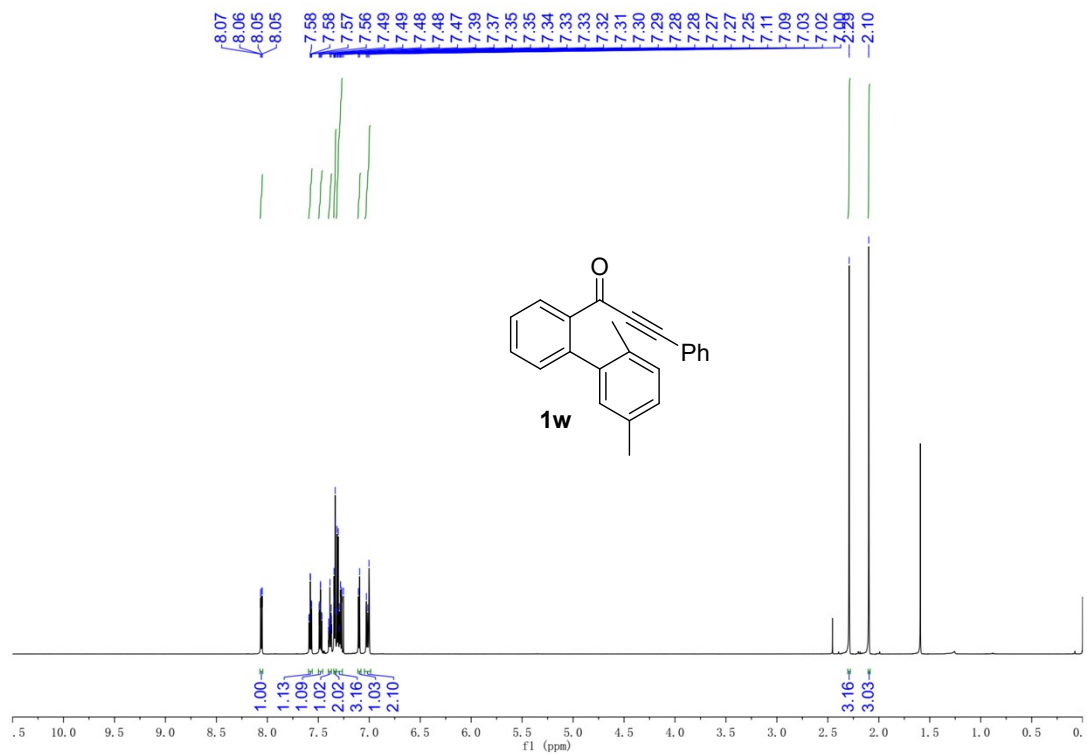

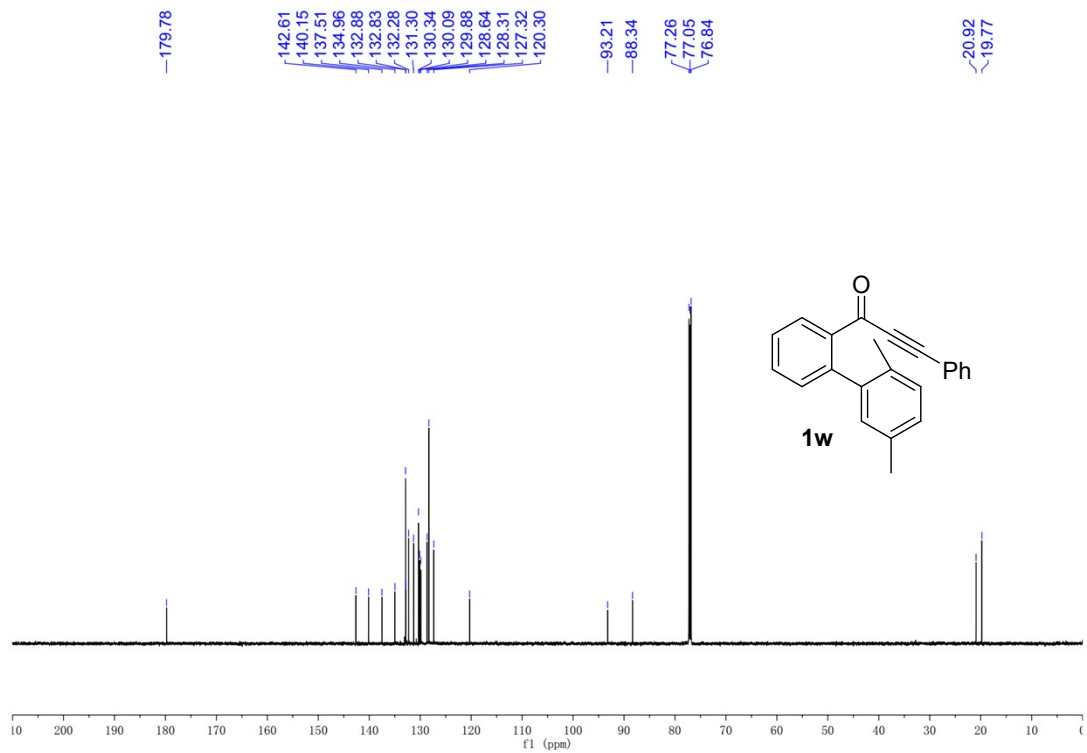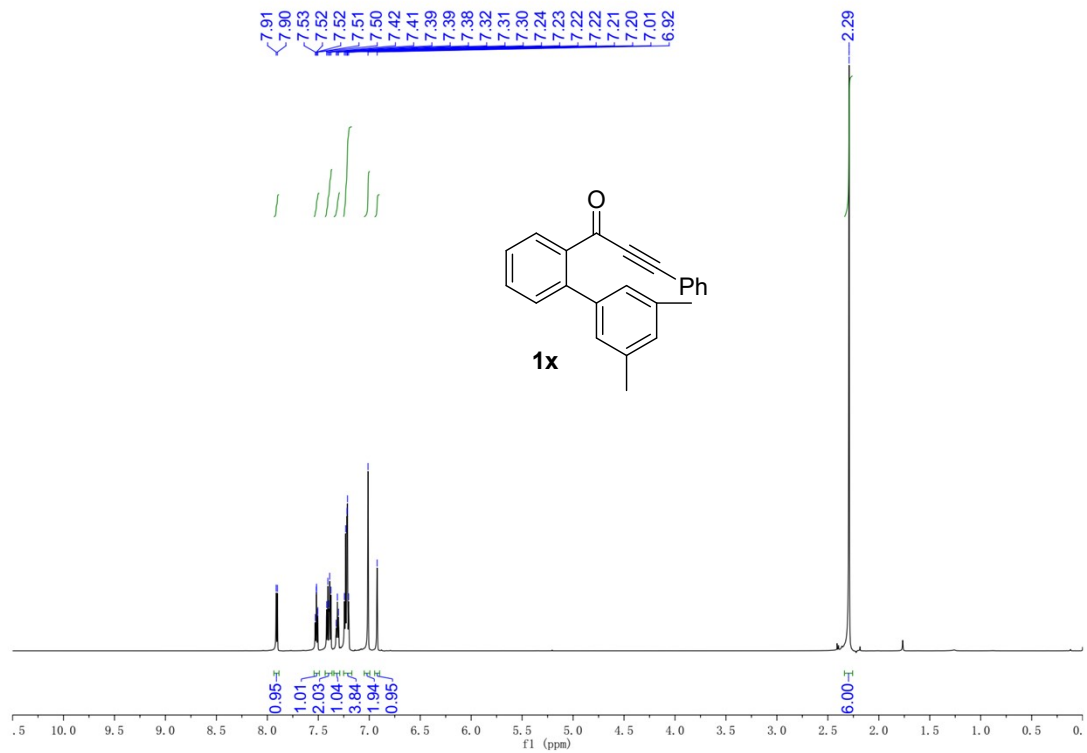



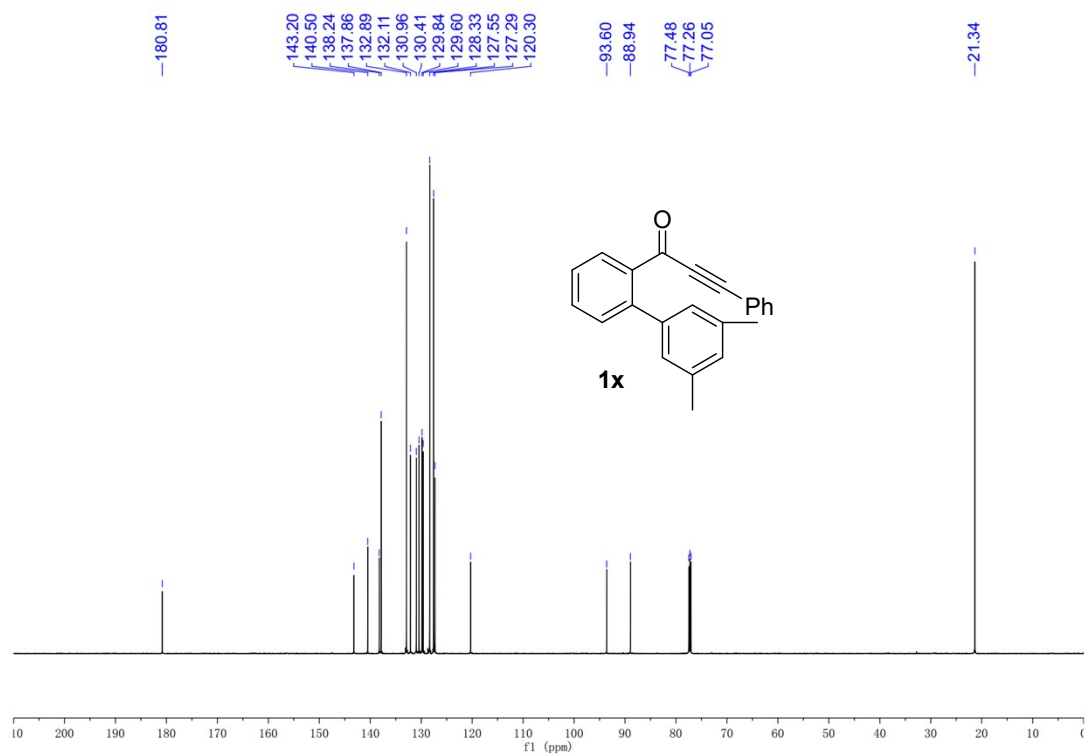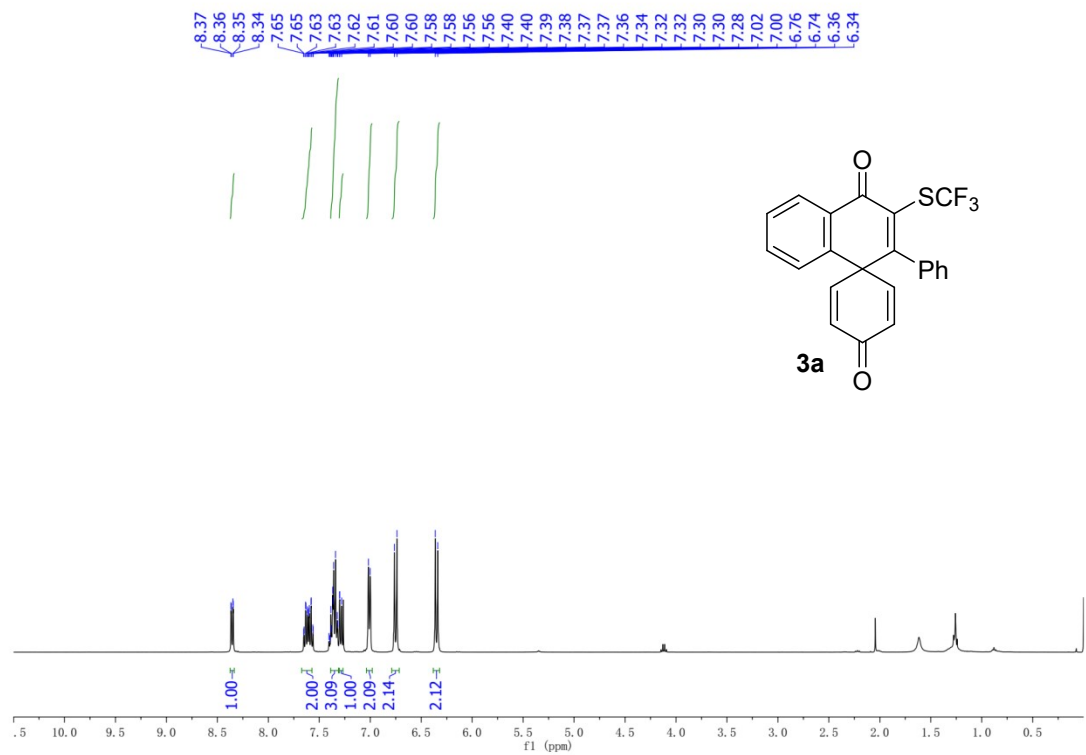

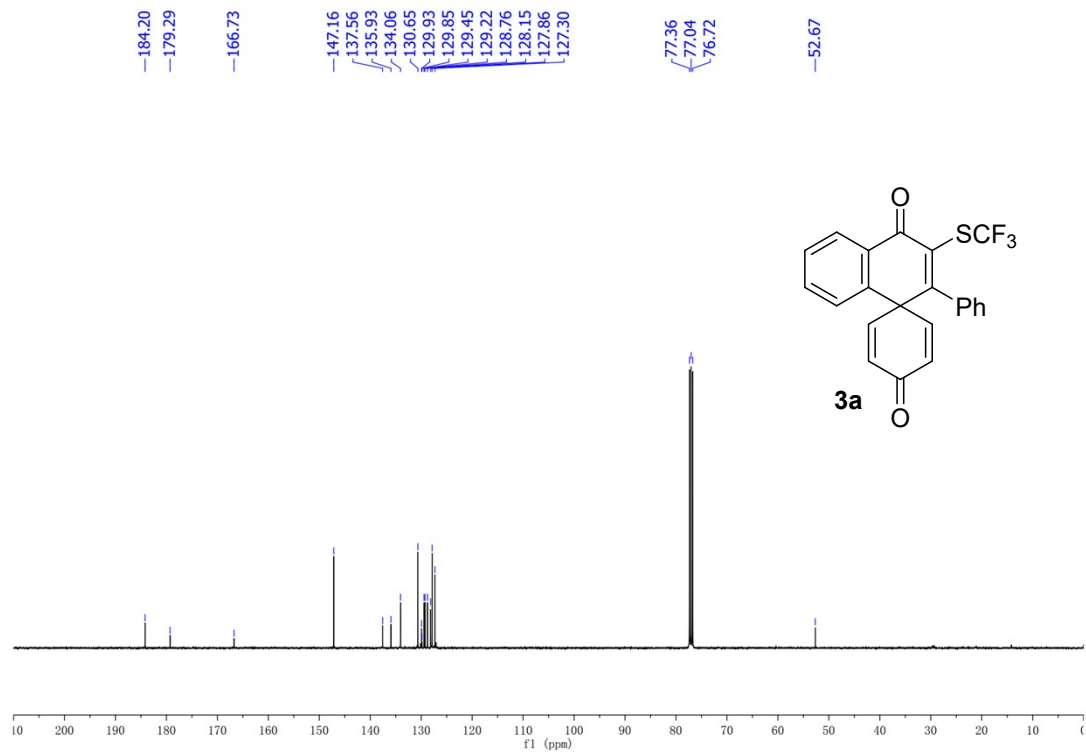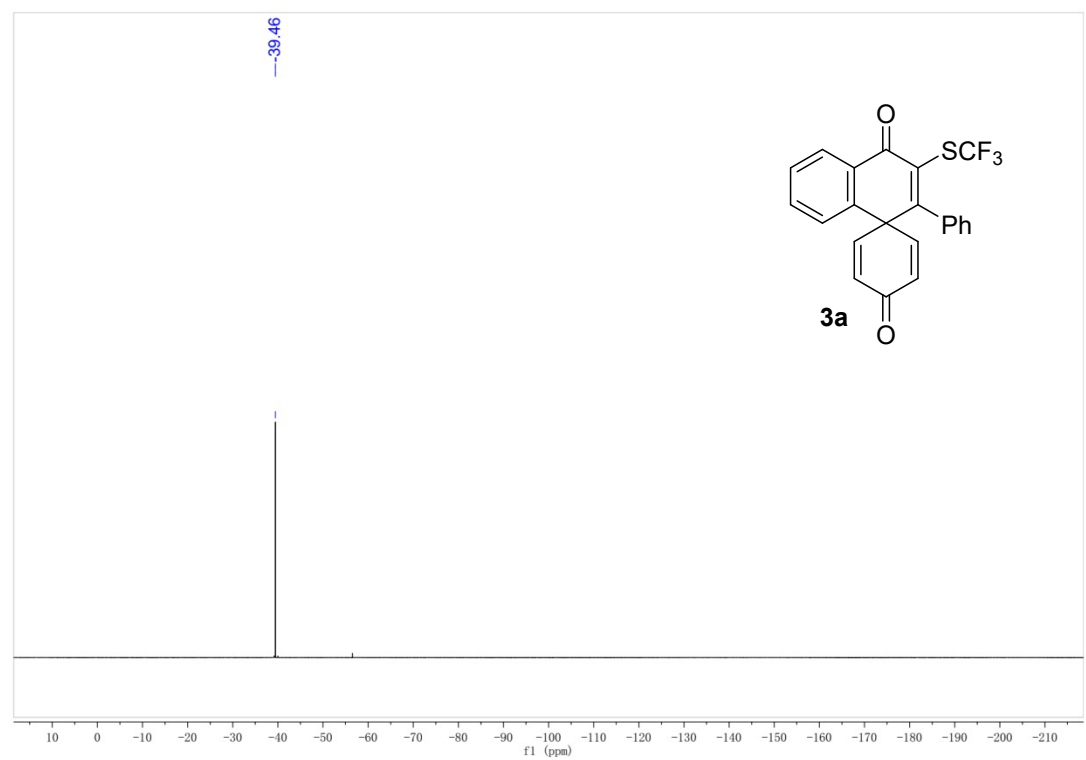

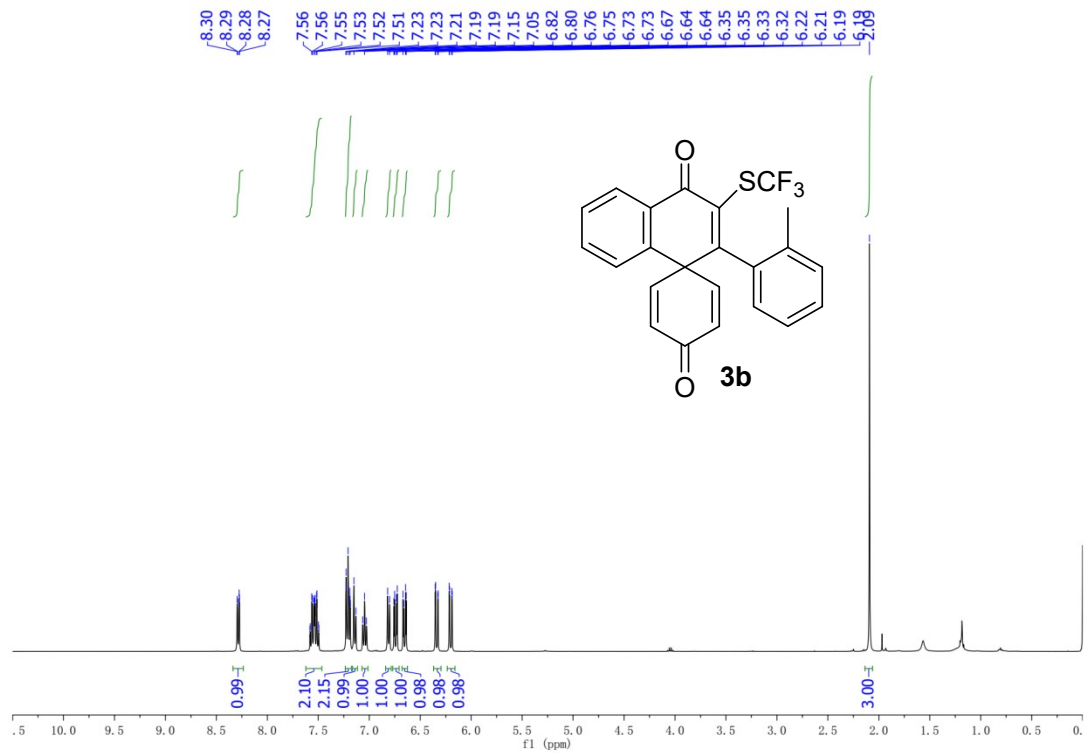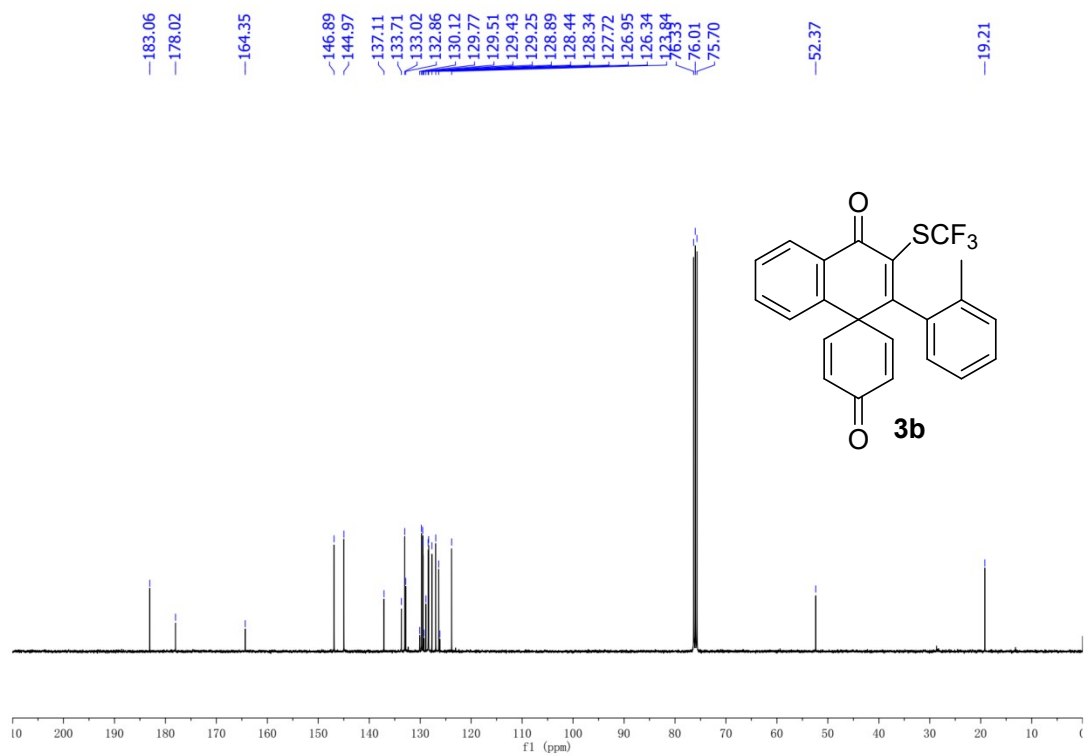

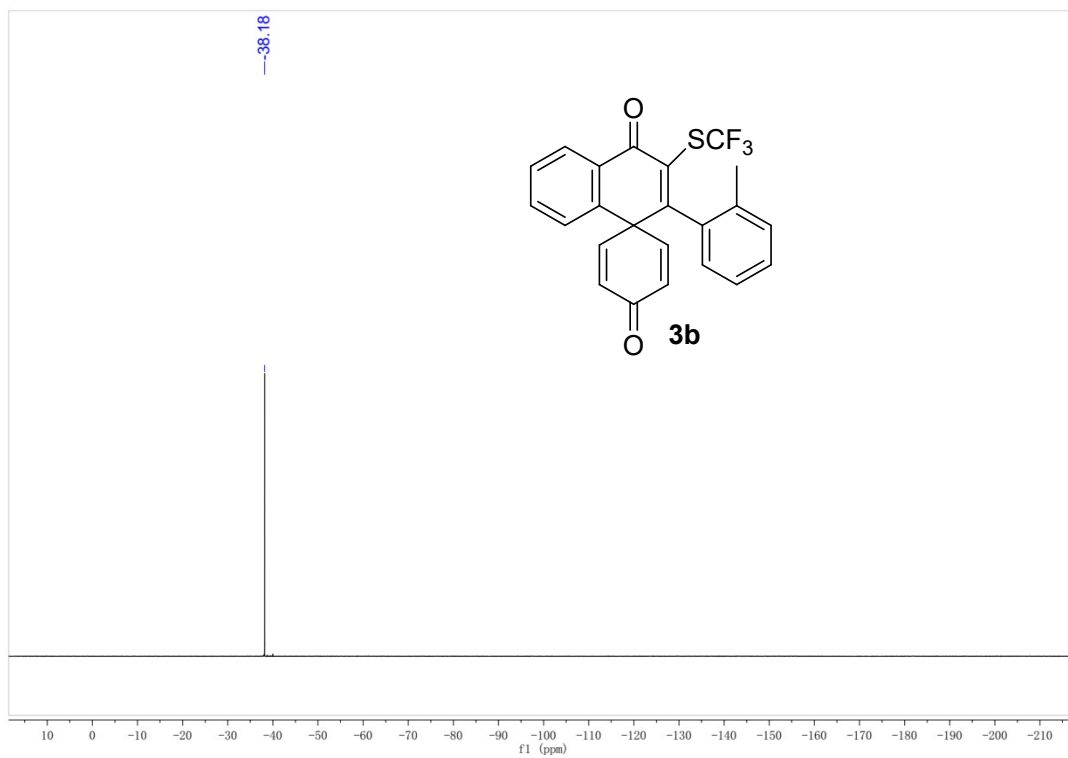

8.34  
8.34  
8.32  
8.32  
7.67  
7.66  
7.65  
7.65  
7.63  
7.63  
7.60  
7.60  
7.59  
7.58  
7.57  
7.56  
7.54  
7.54  
7.52  
7.52  
7.30  
7.28  
7.27  
7.25  
7.23  
7.21  
7.19  
6.98  
6.97  
6.78  
6.75  
6.73  
6.42  
6.40  
6.37

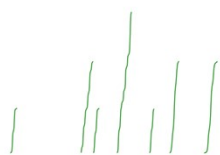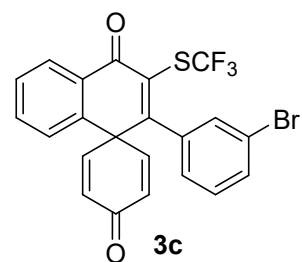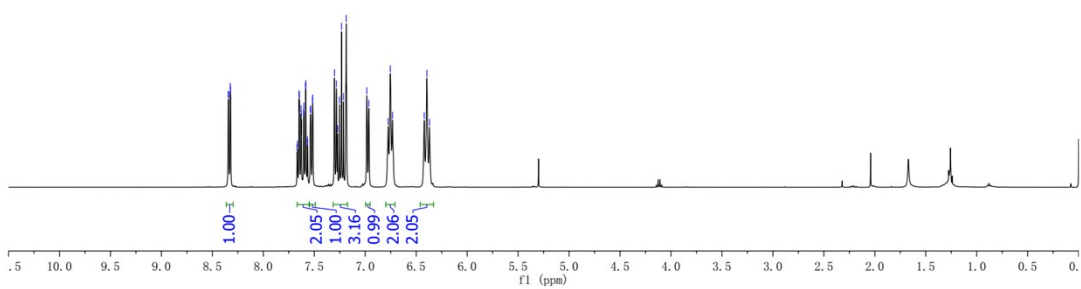

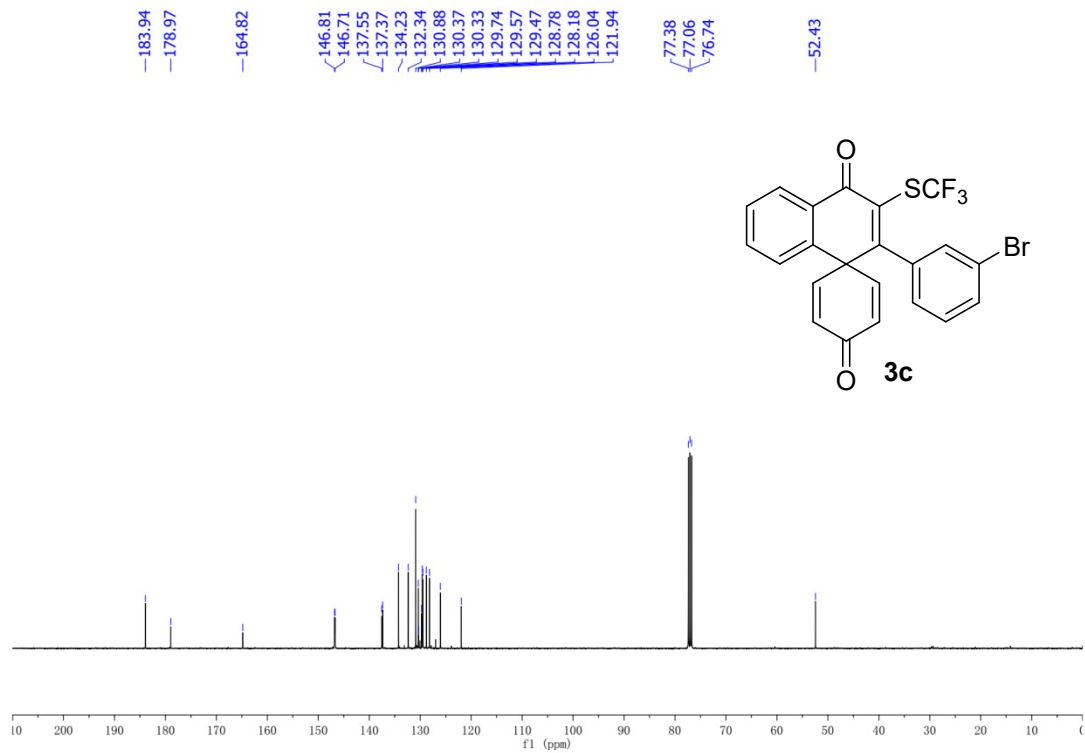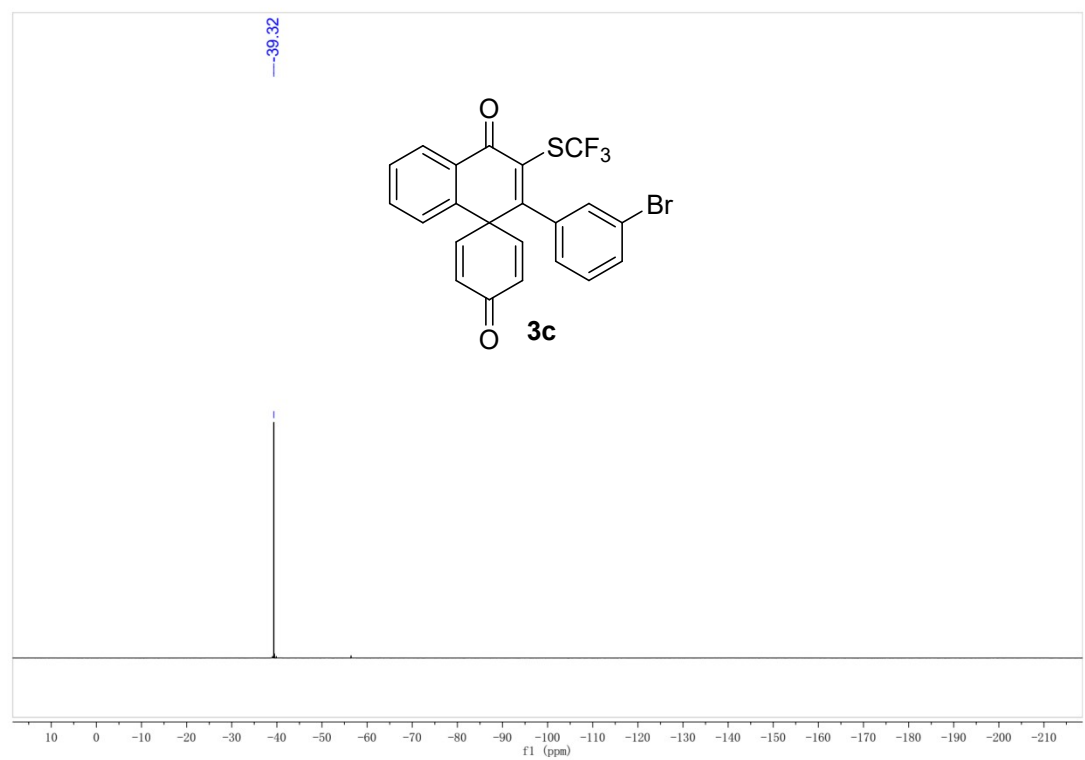

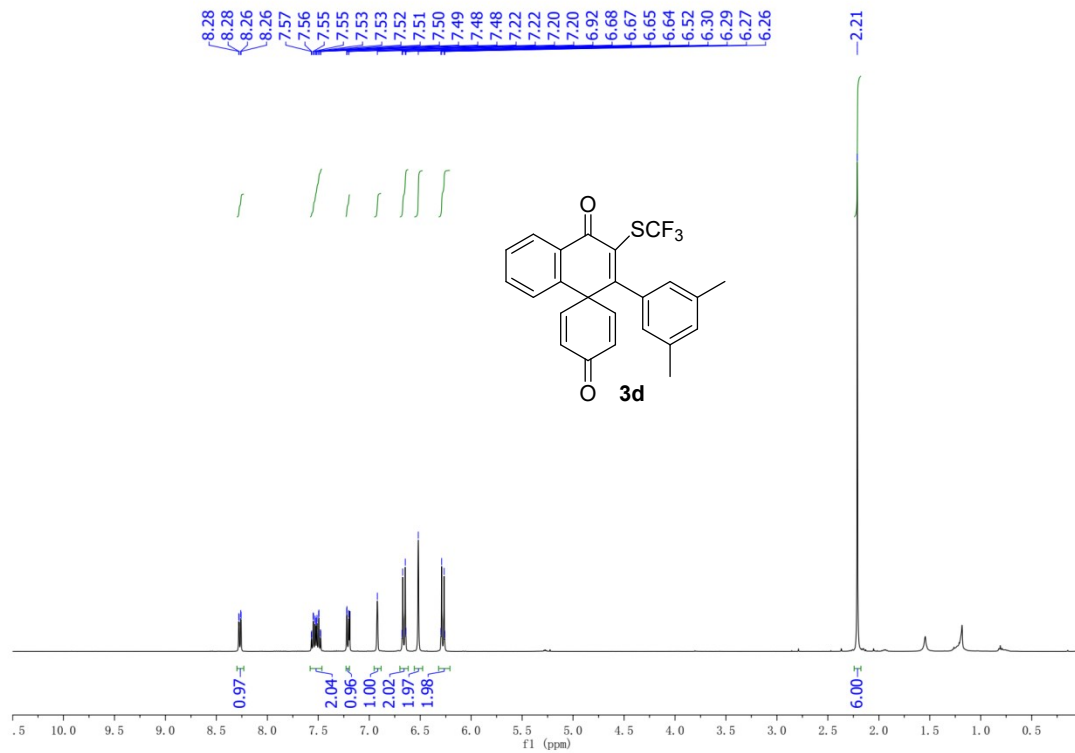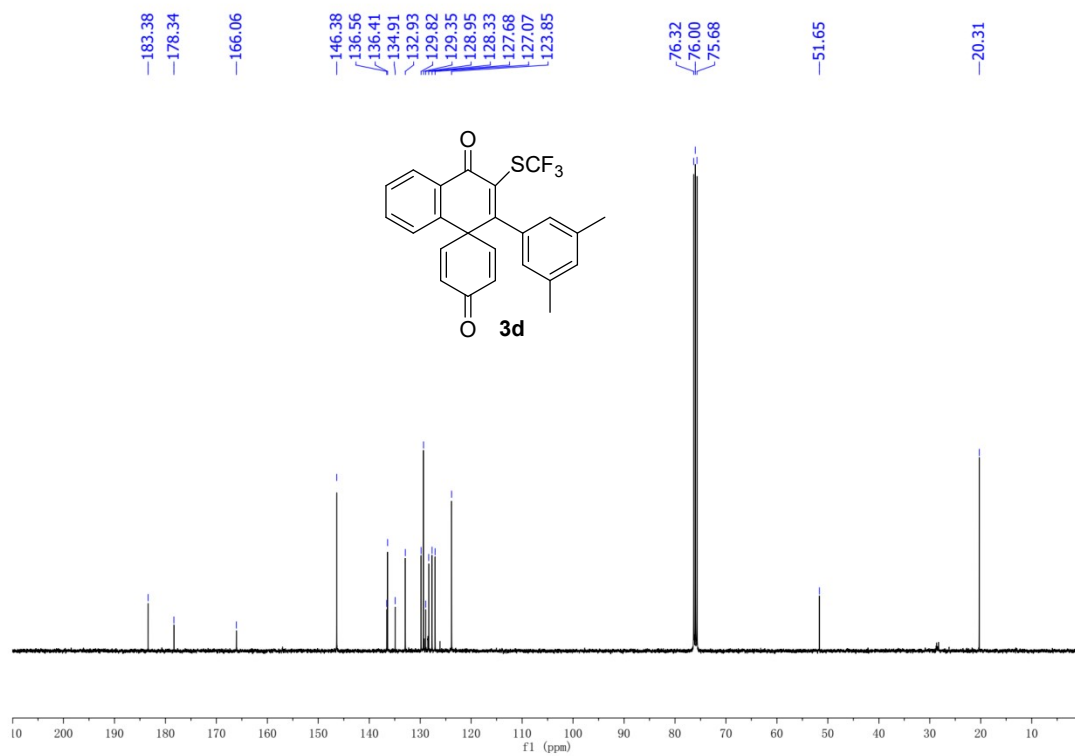

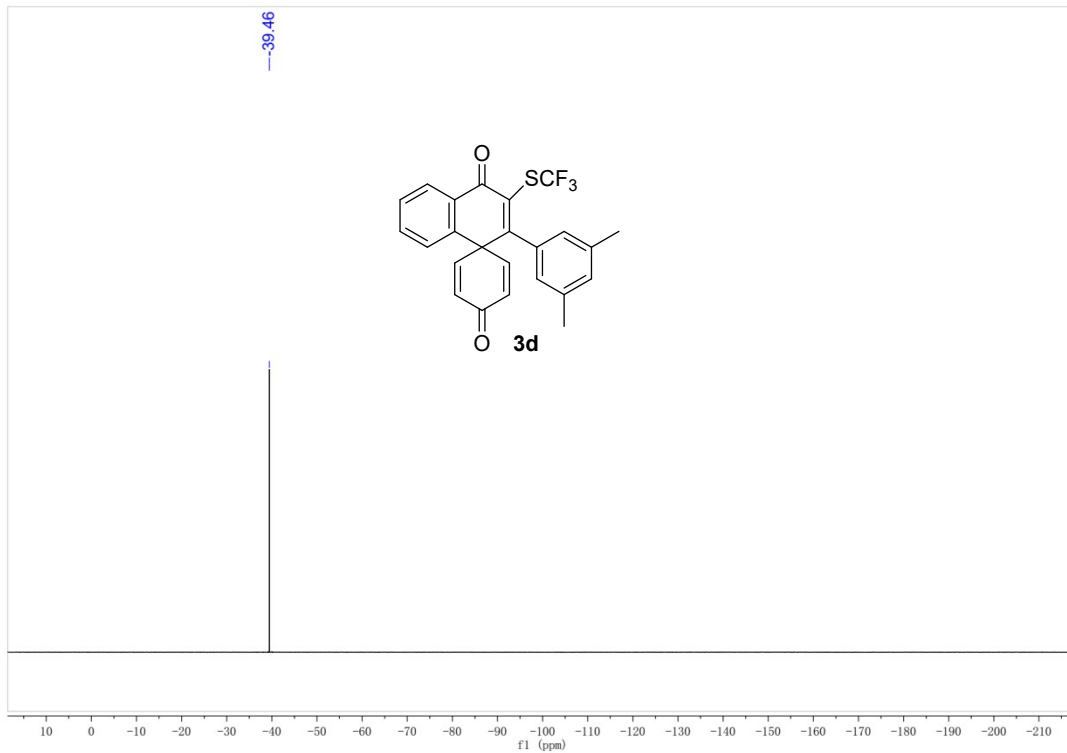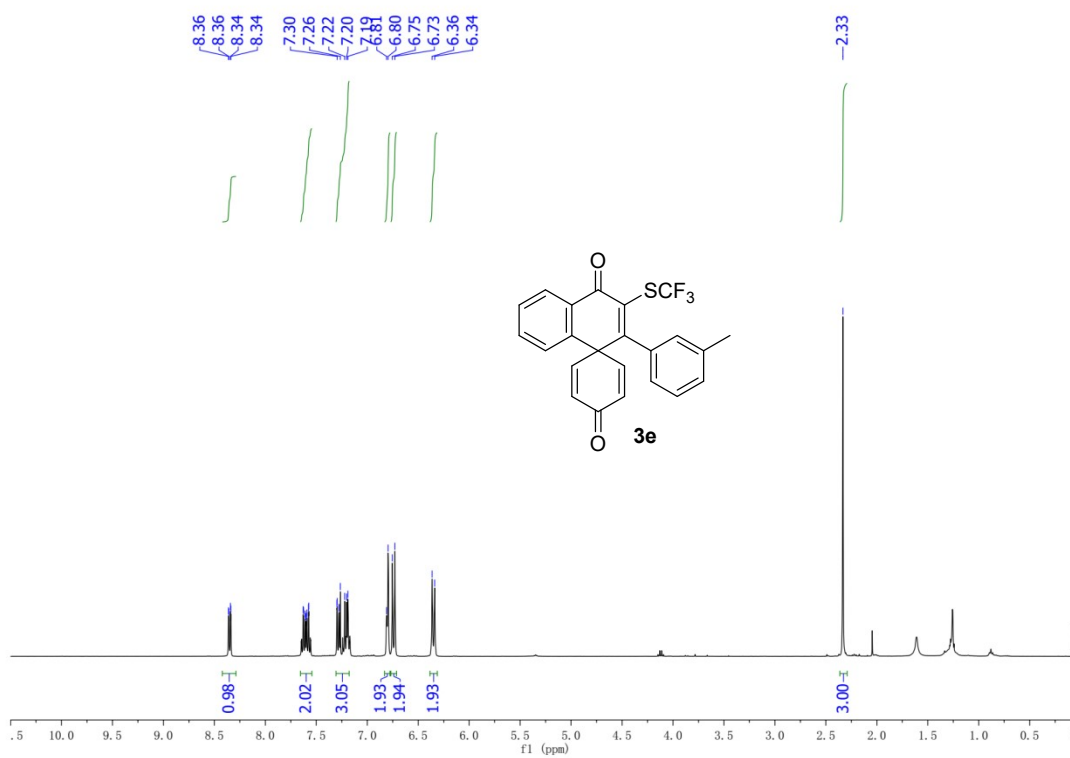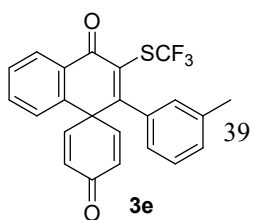

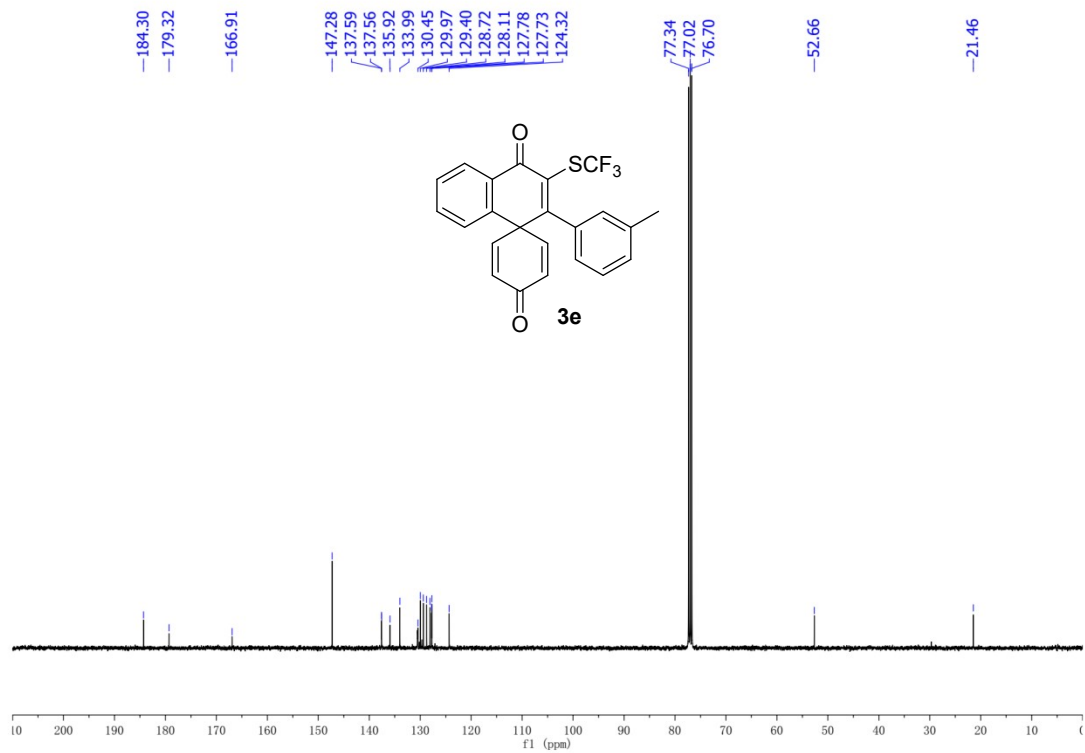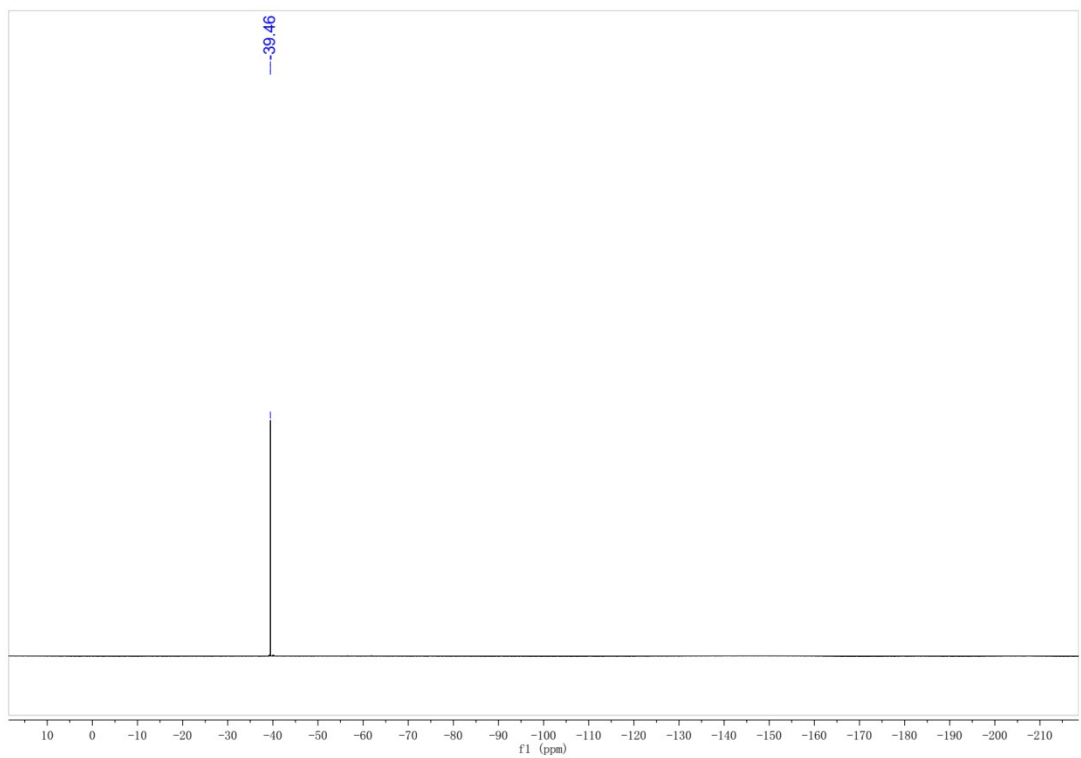



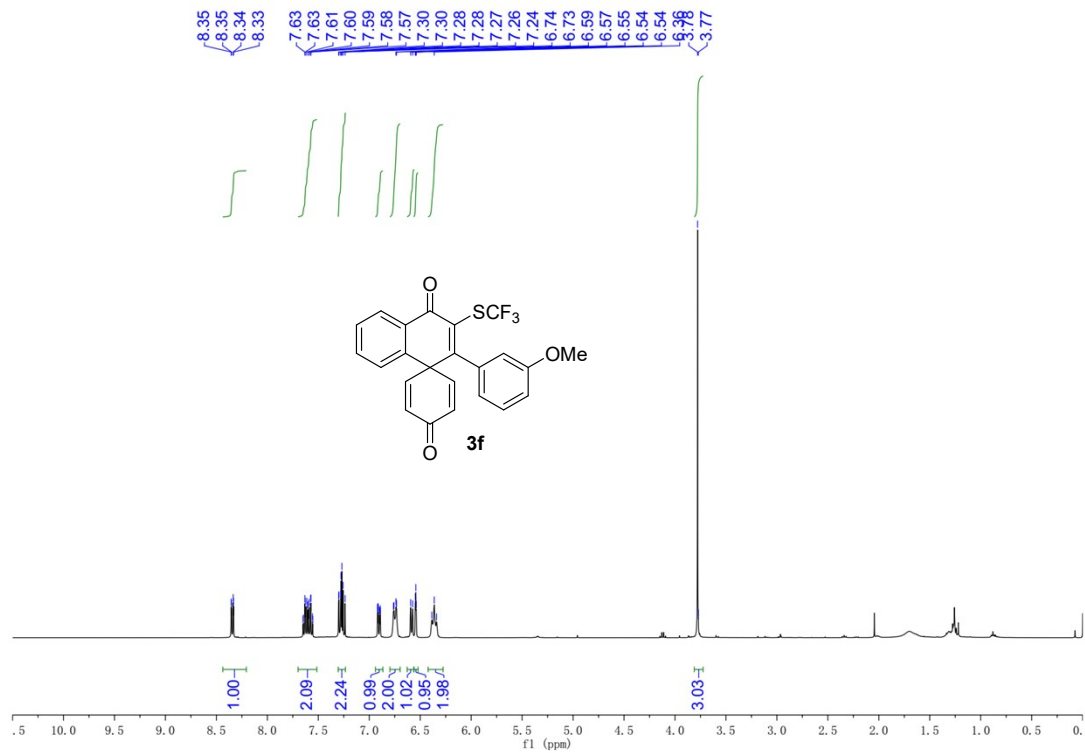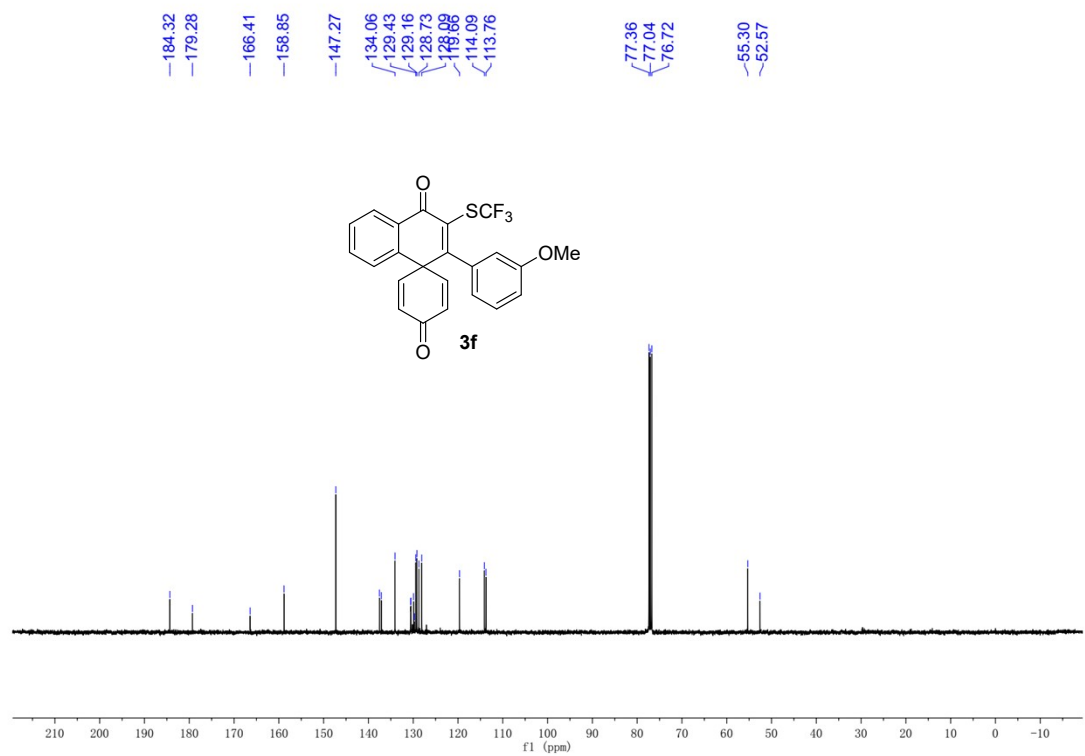

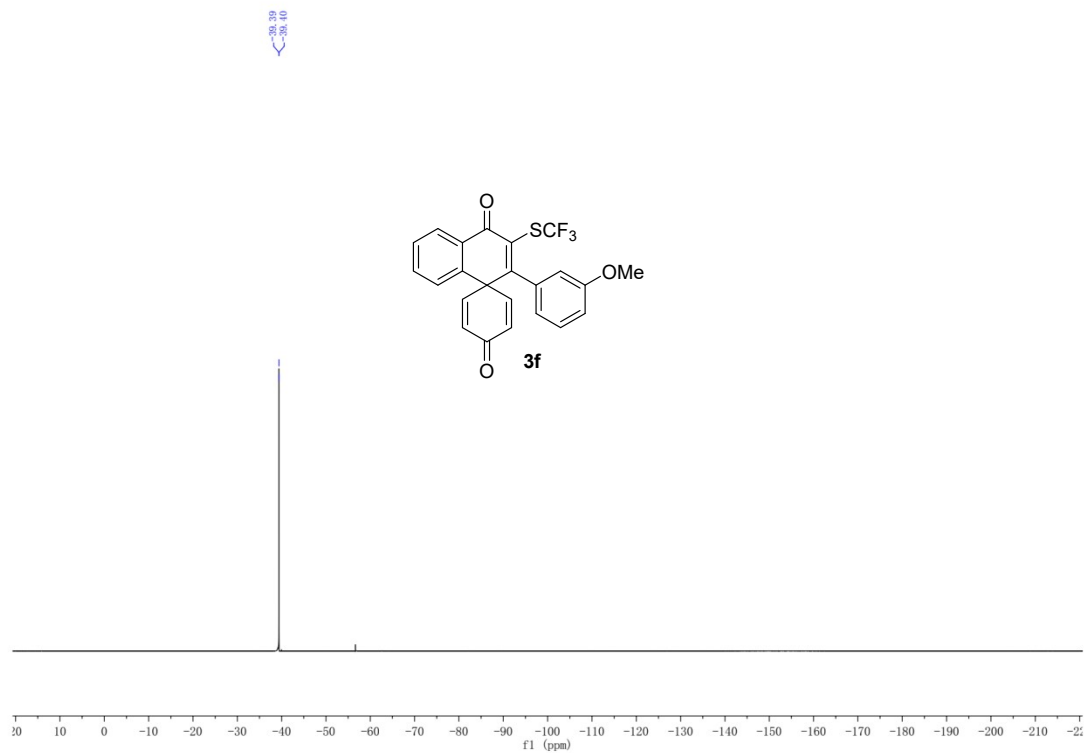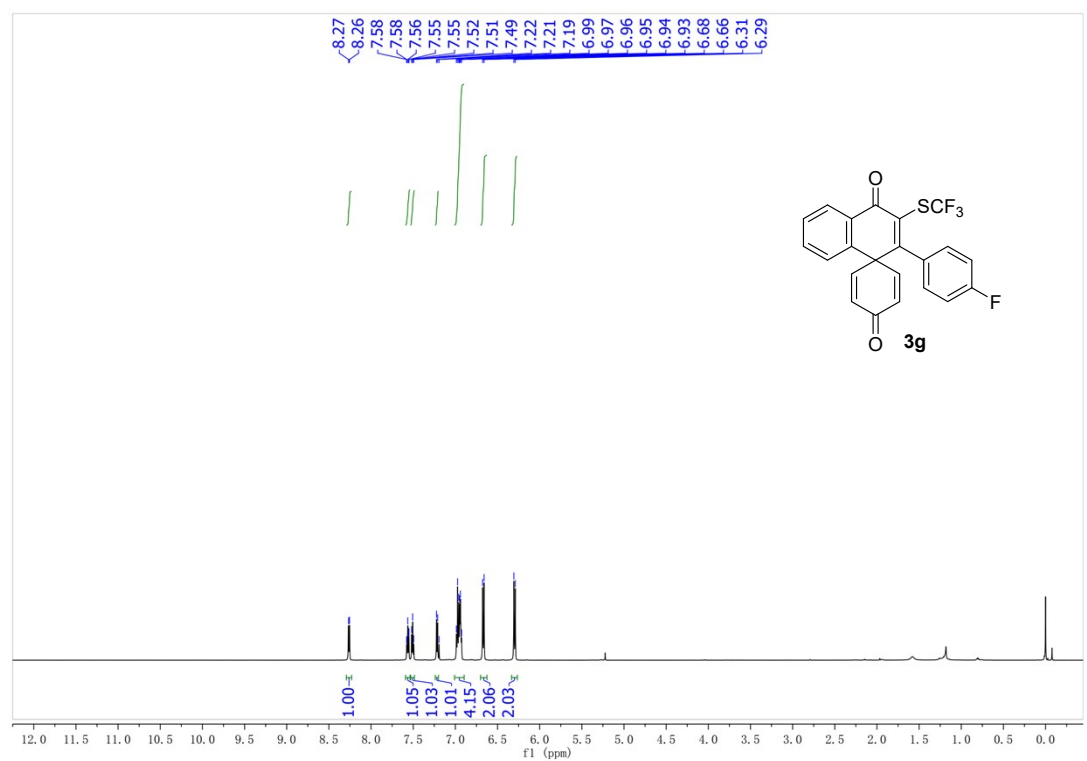

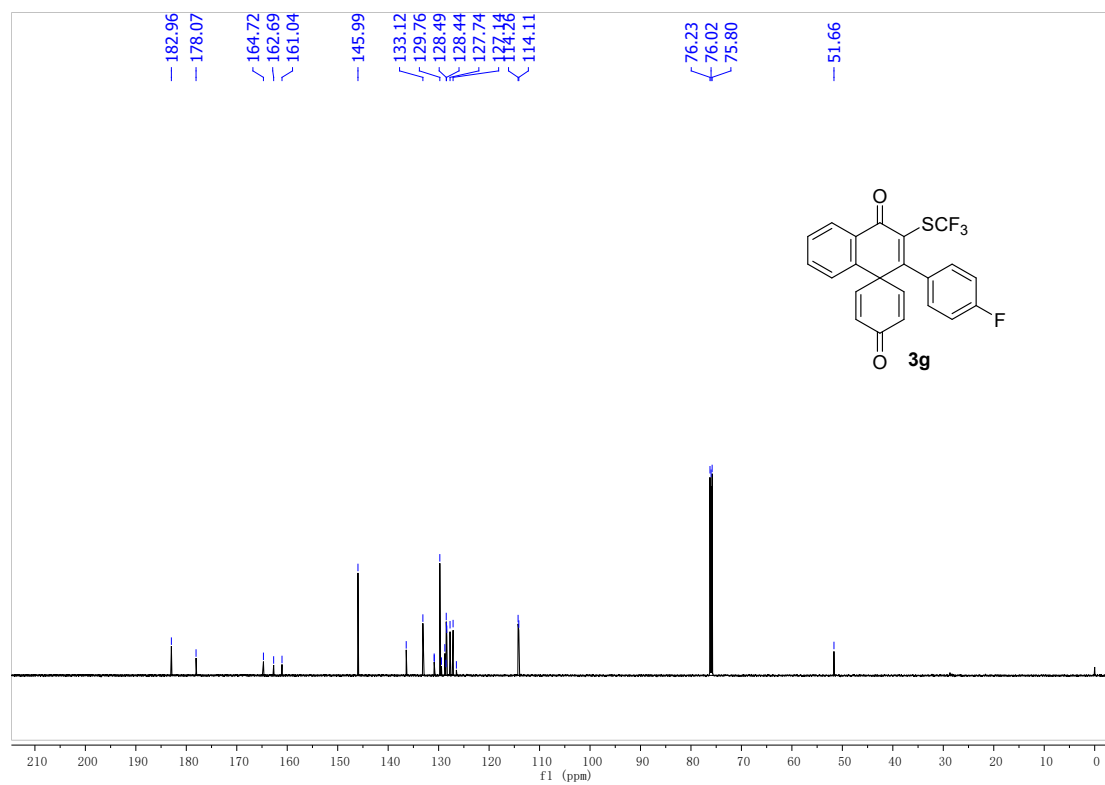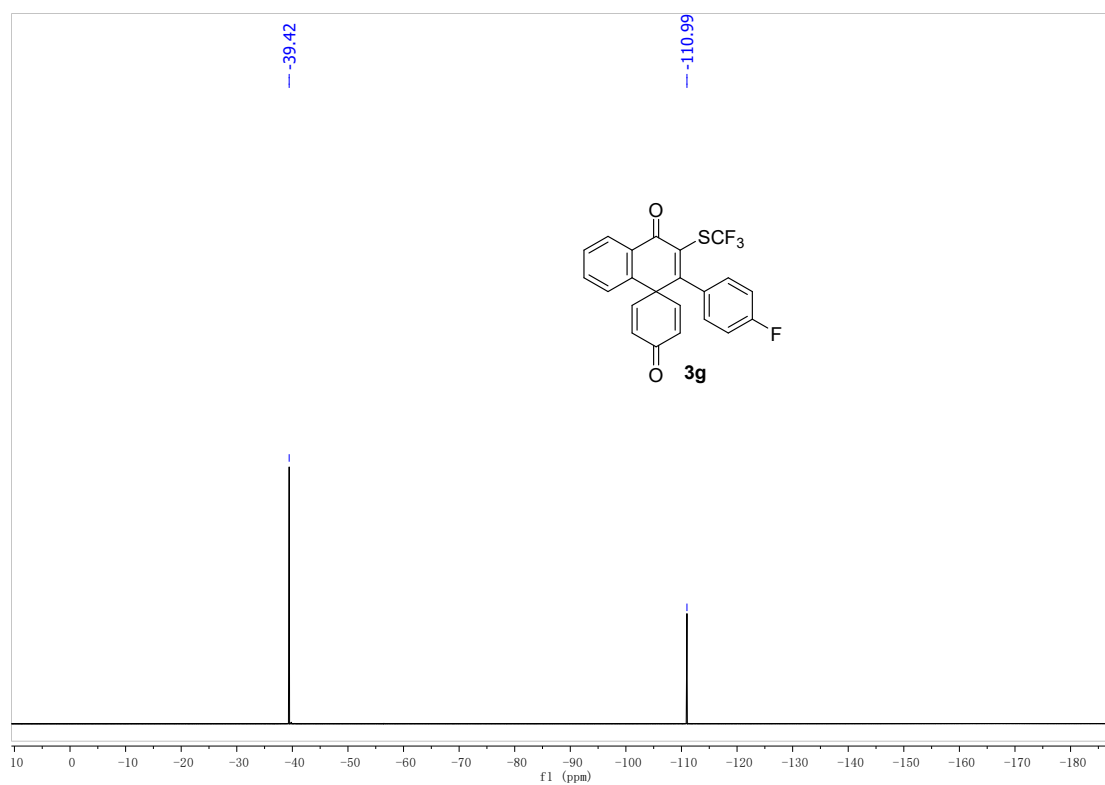

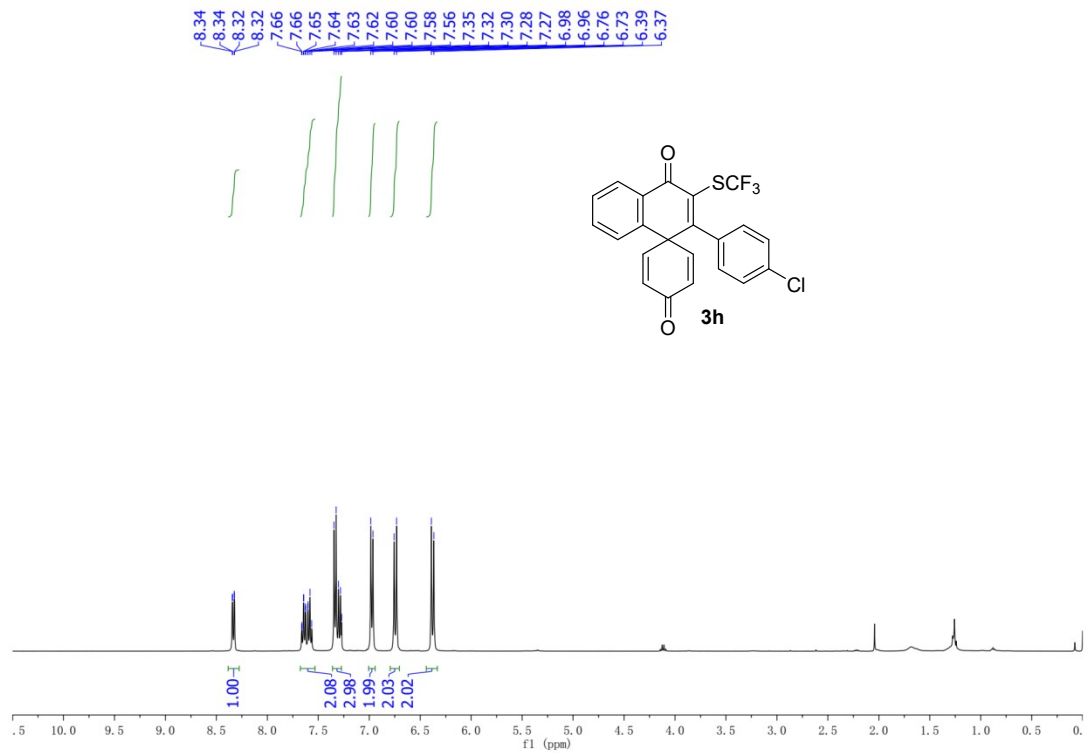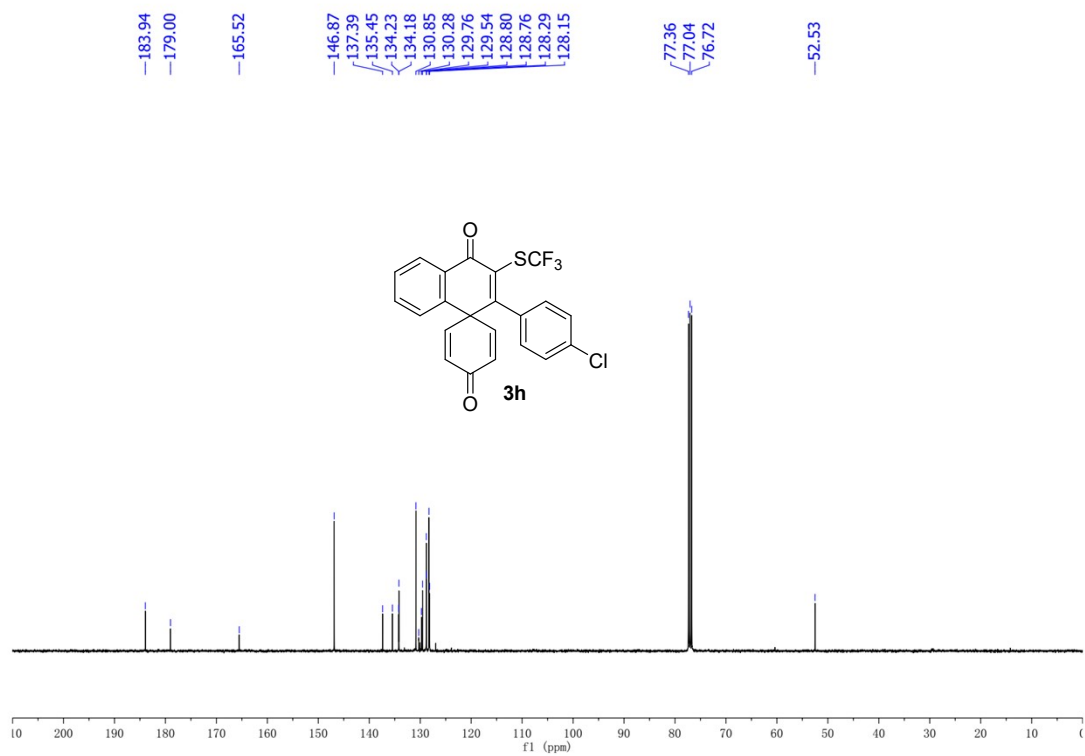

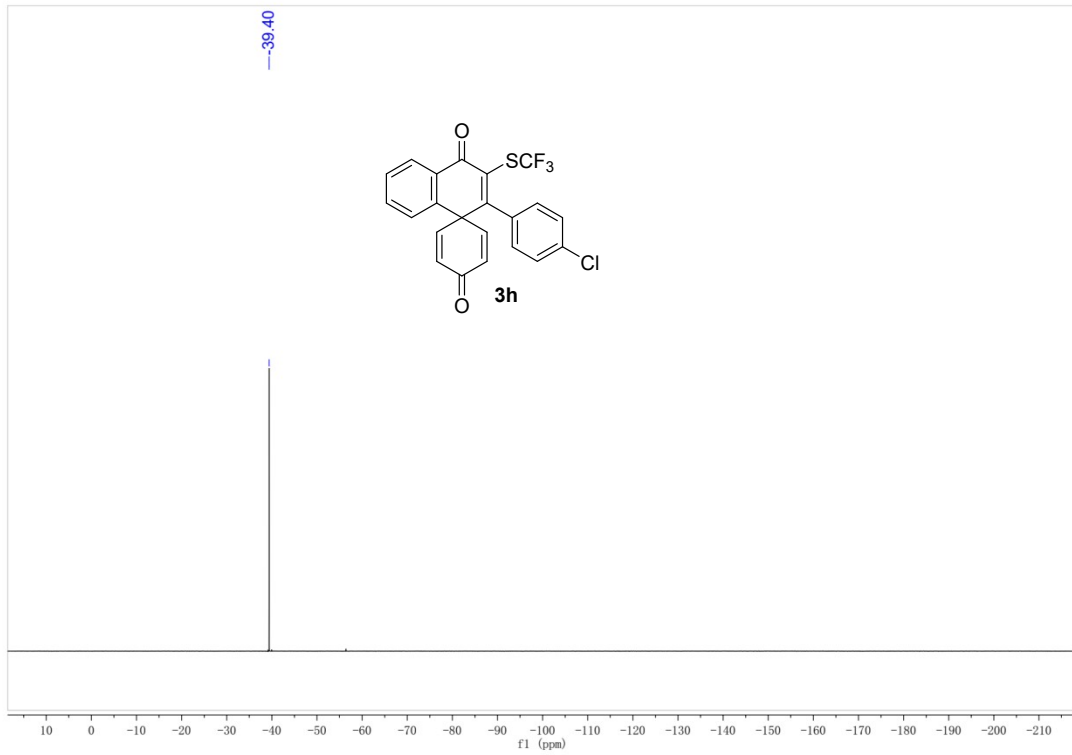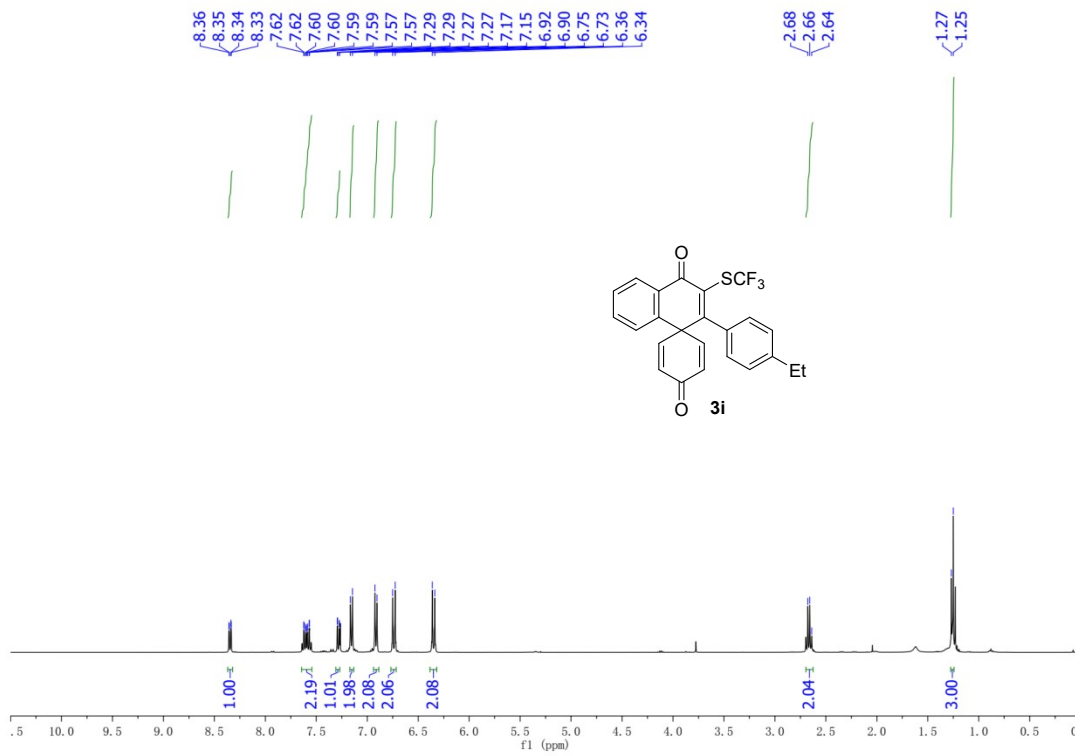

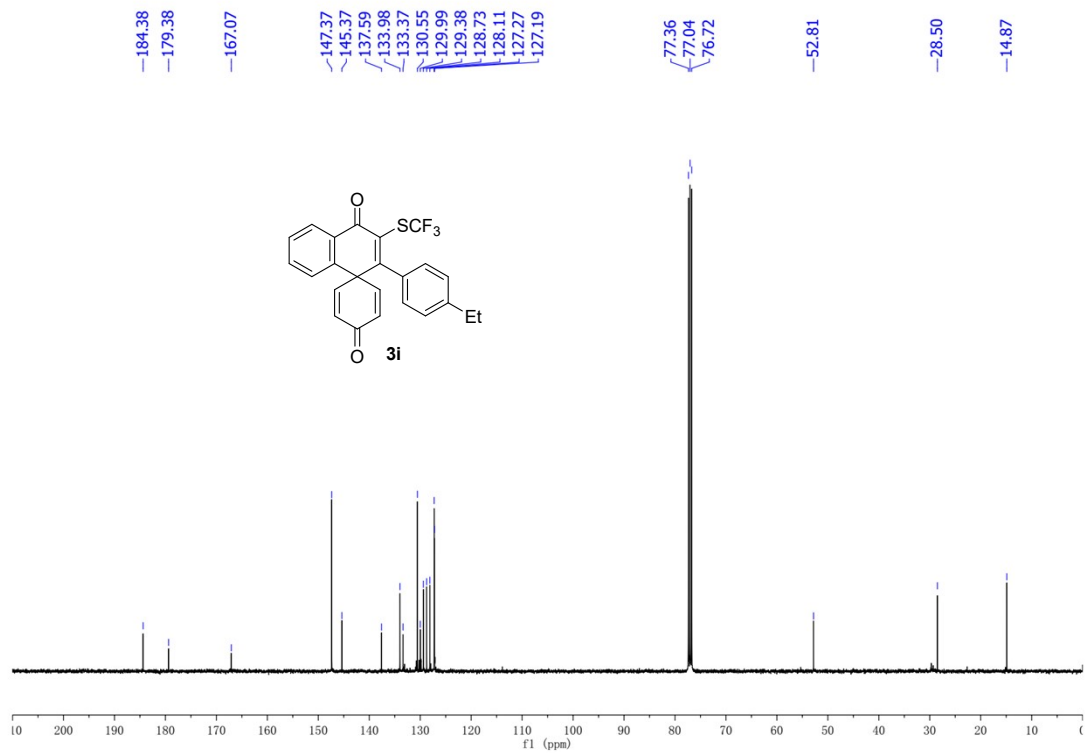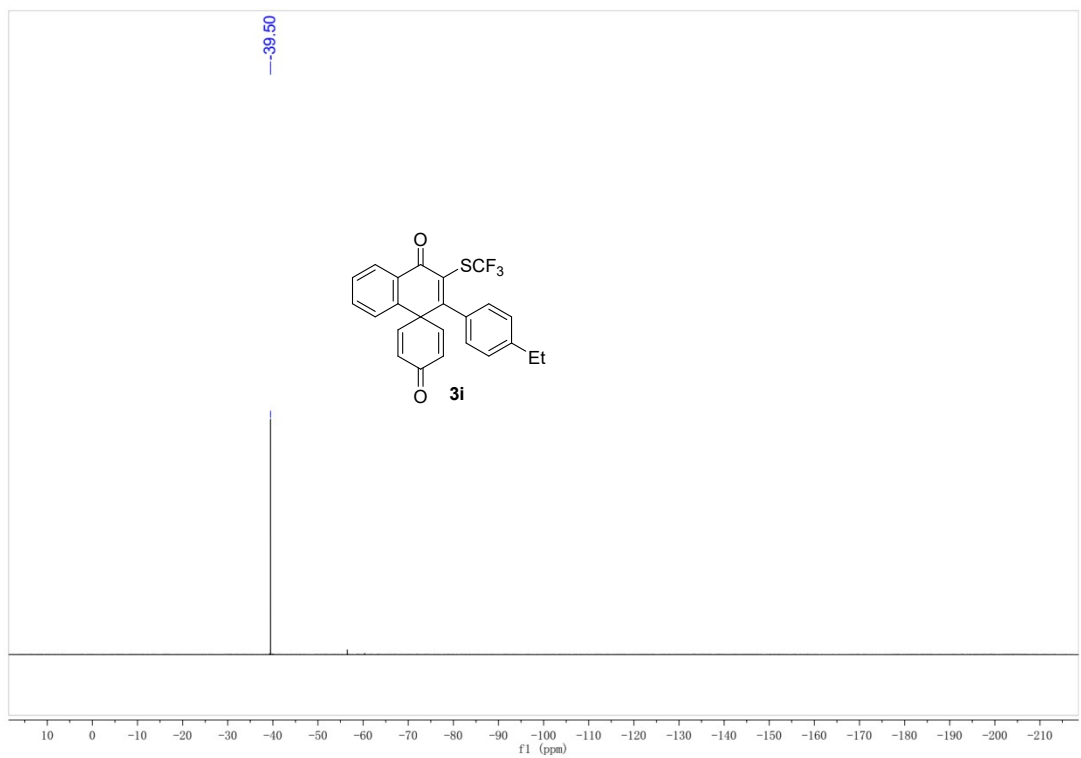

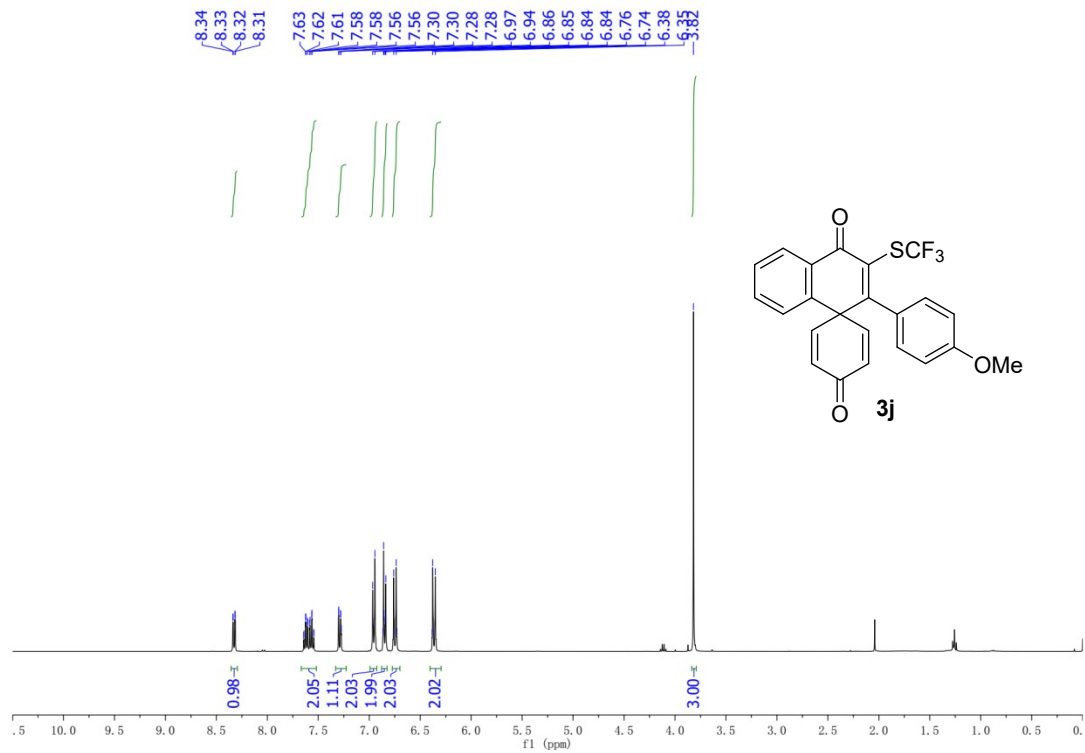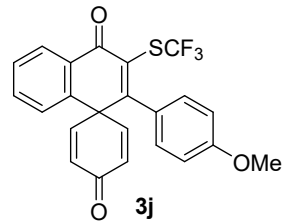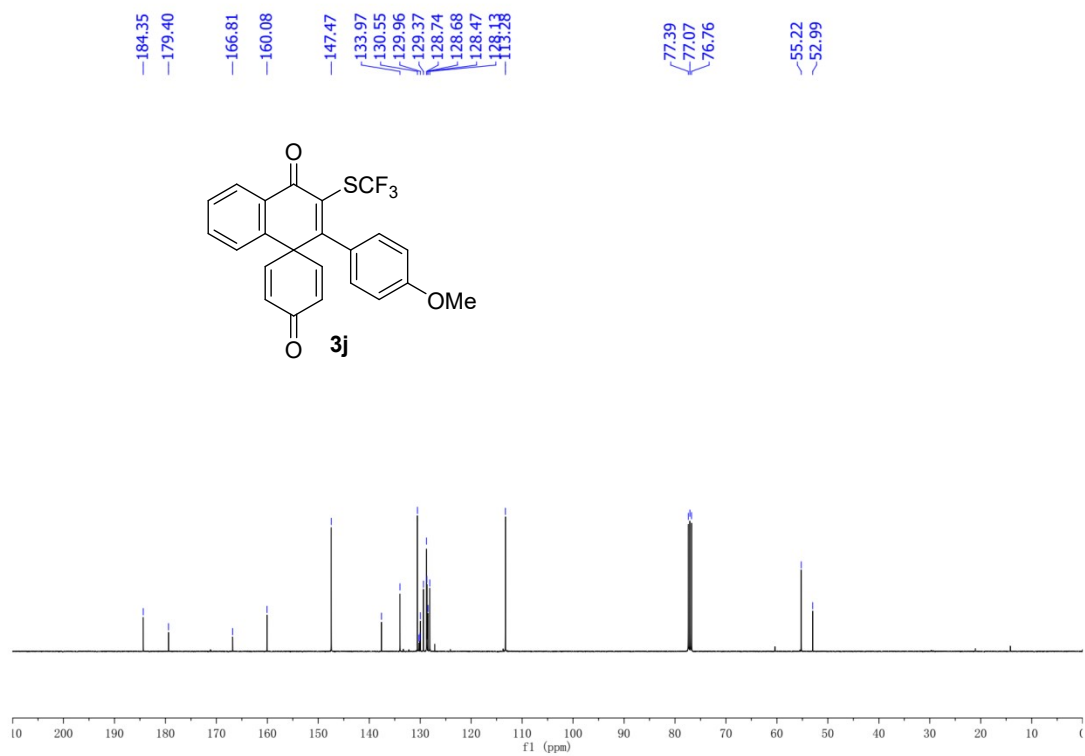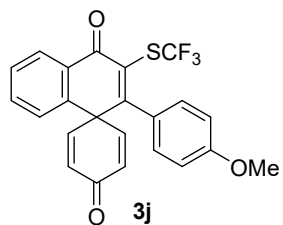

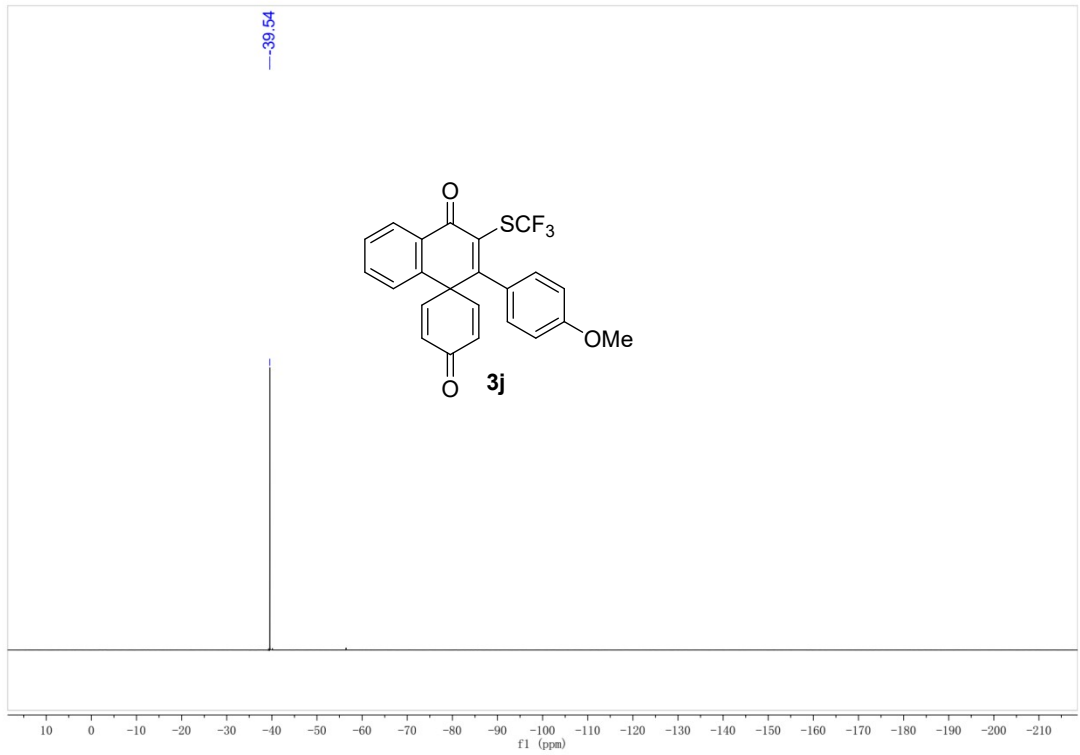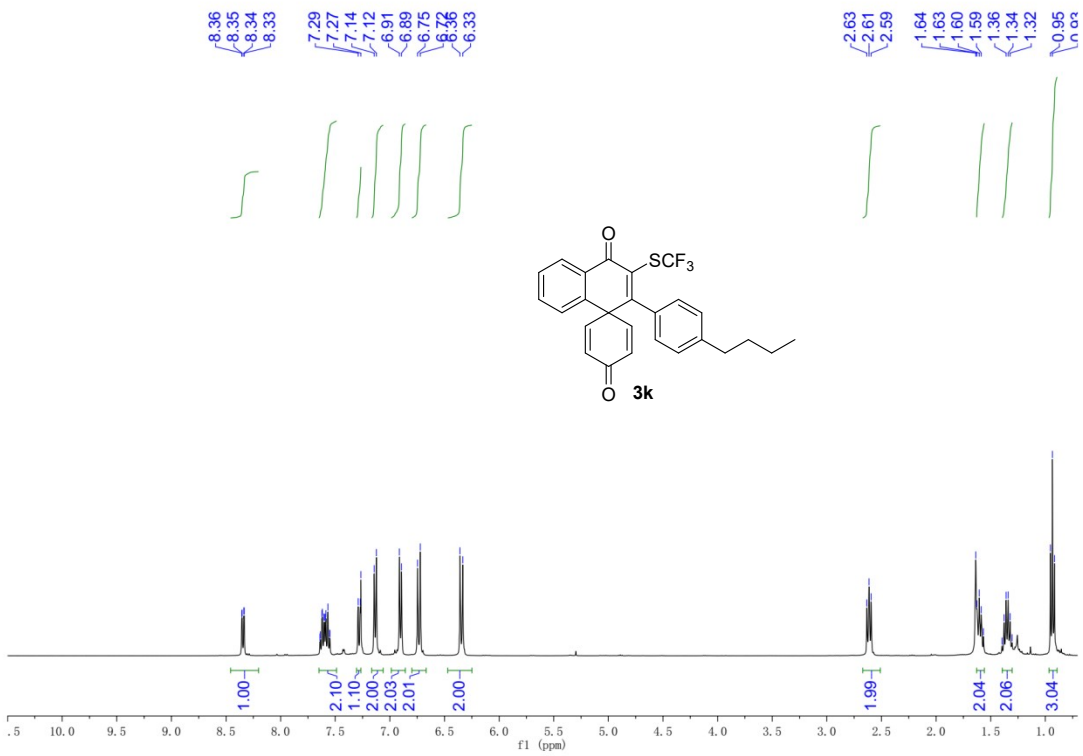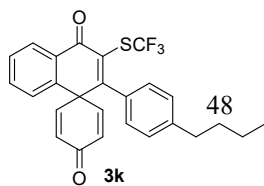



—184.35  
 —179.39  
 —167.09  
 —147.37  
 —144.19  
 —137.62  
 —133.97  
 —133.33  
 —130.53  
 —129.98  
 —129.77  
 —129.37  
 —128.72  
 —128.10  
 —127.77  
 —127.13  
 —77.35  
 —77.04  
 —76.72  
 —52.81  
 —35.37  
 —33.10  
 —22.40  
 —13.94

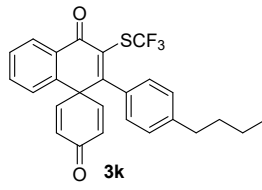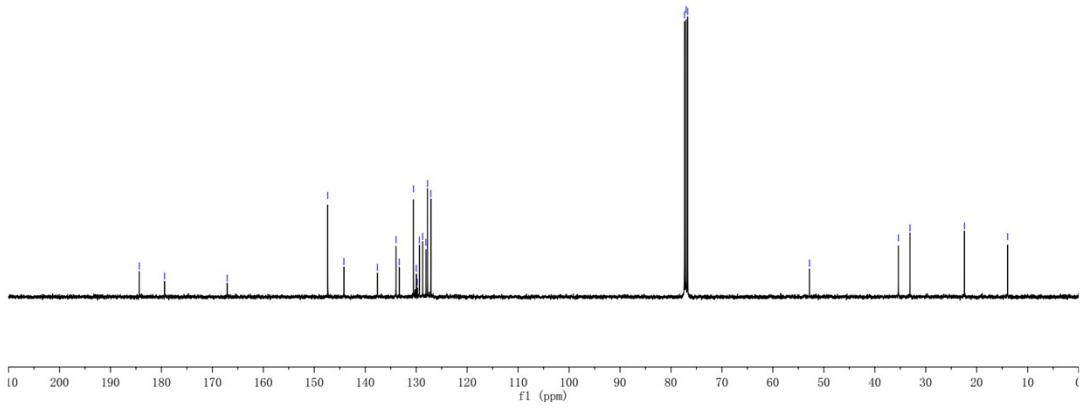

—38.49  
 —38.51

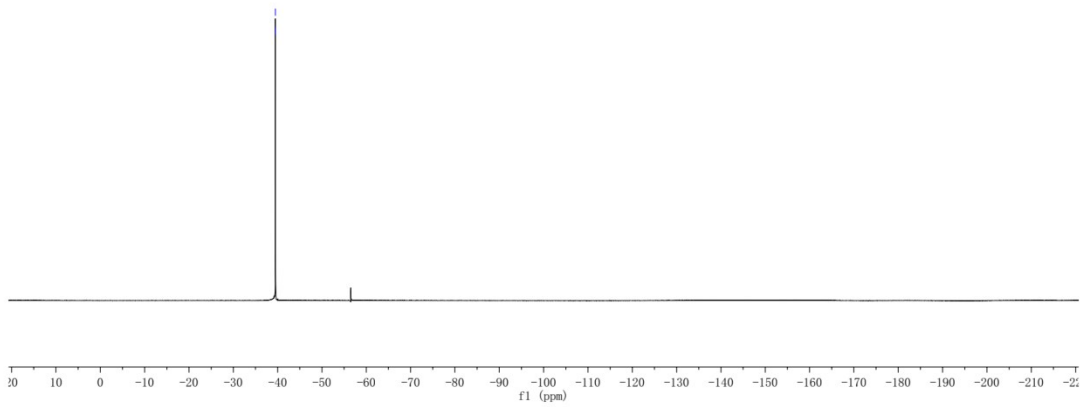

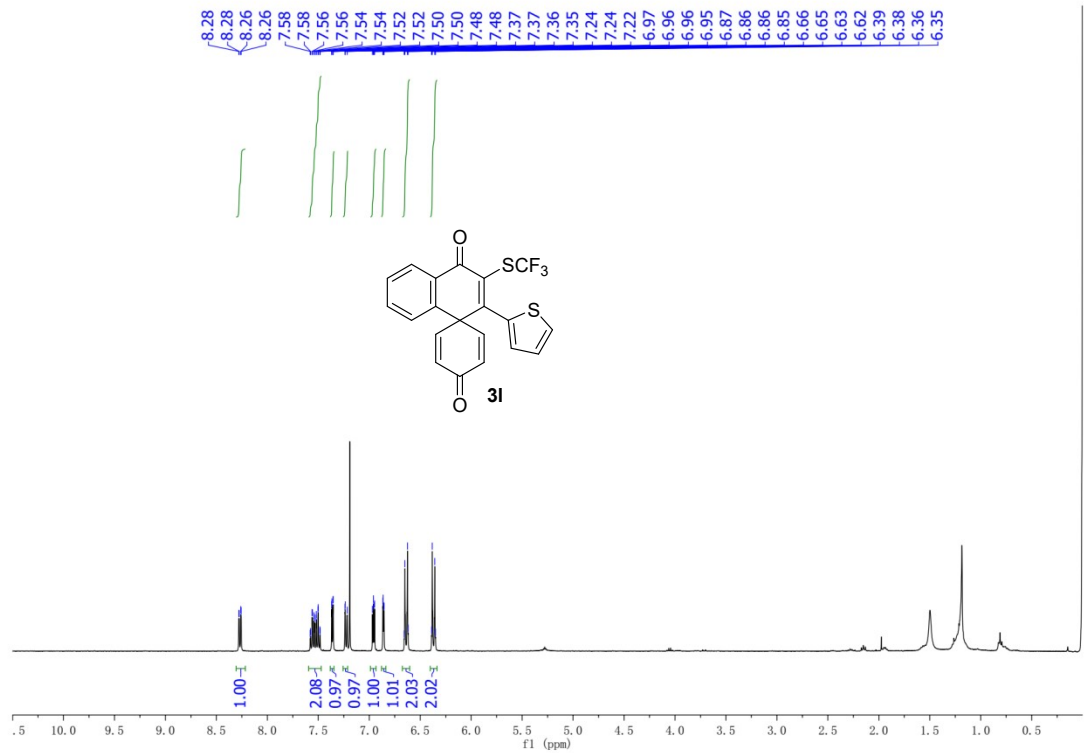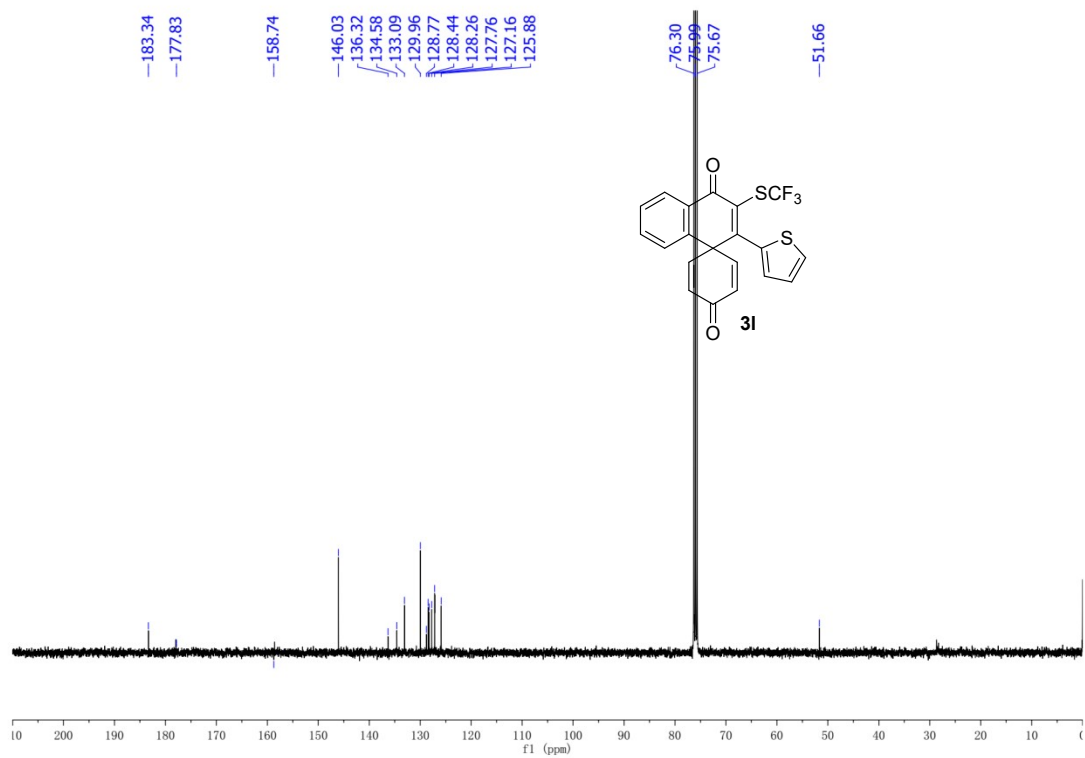

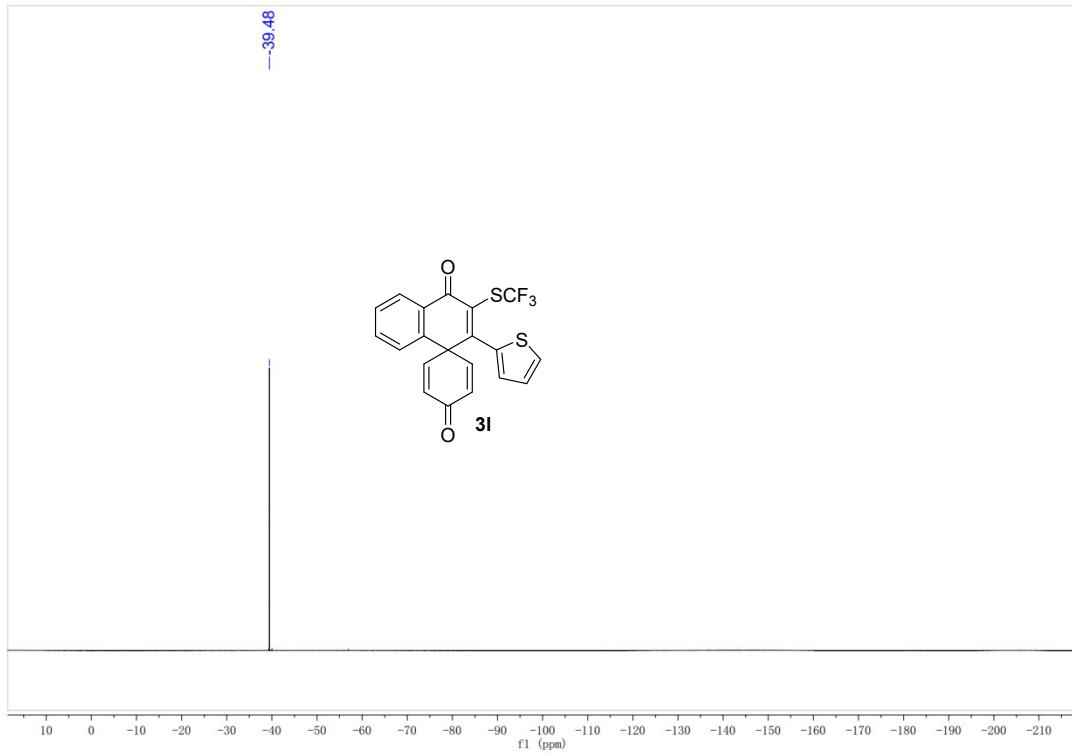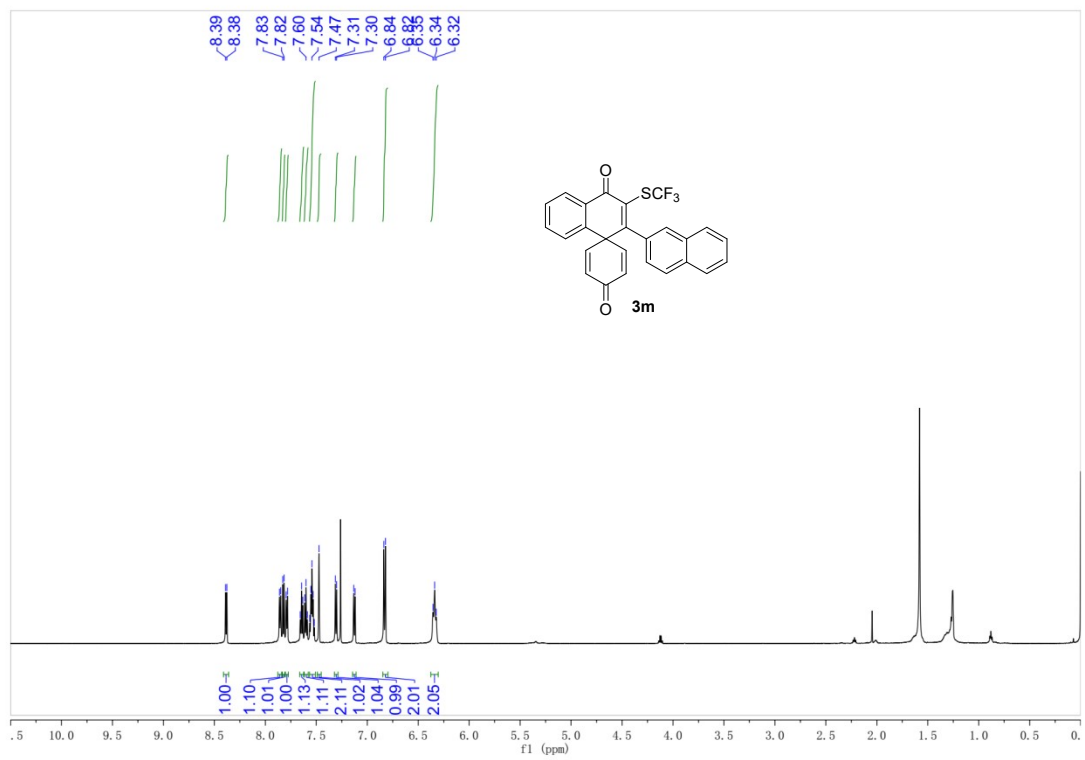

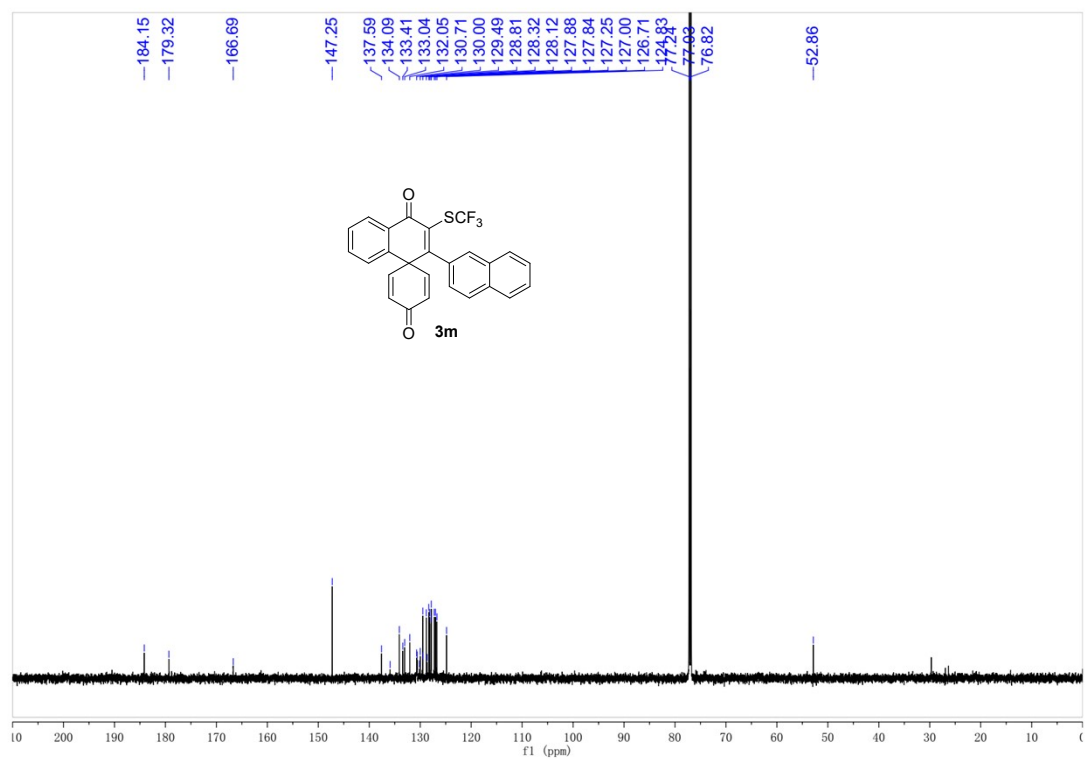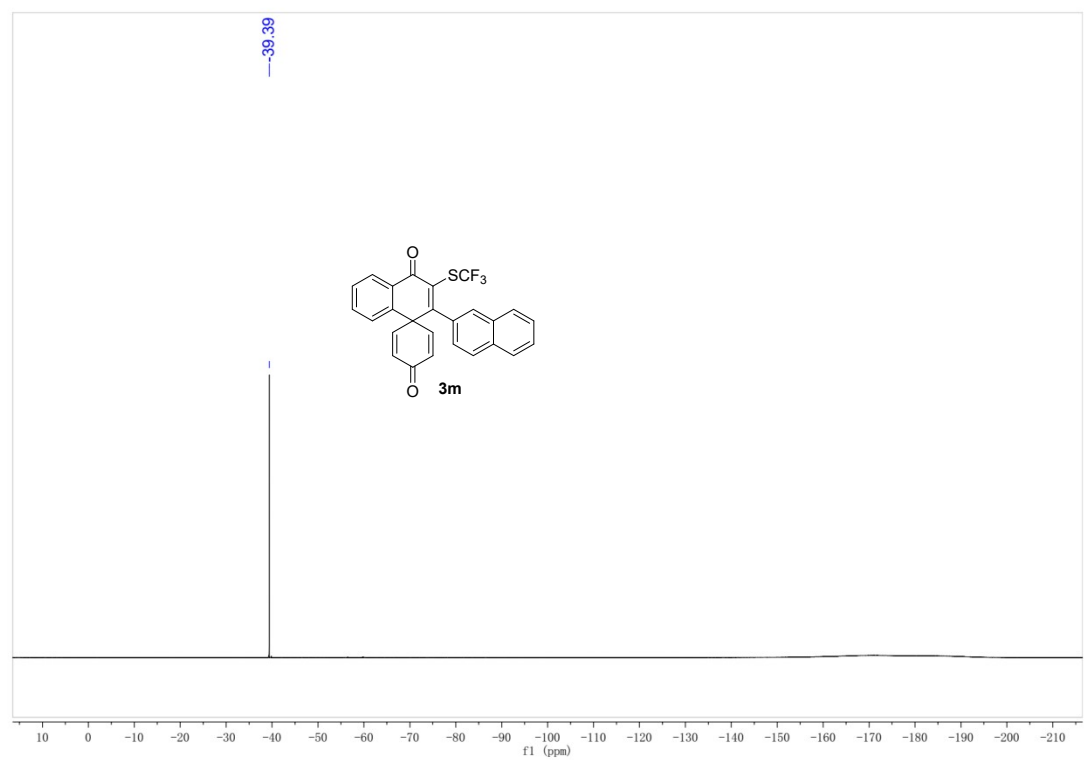

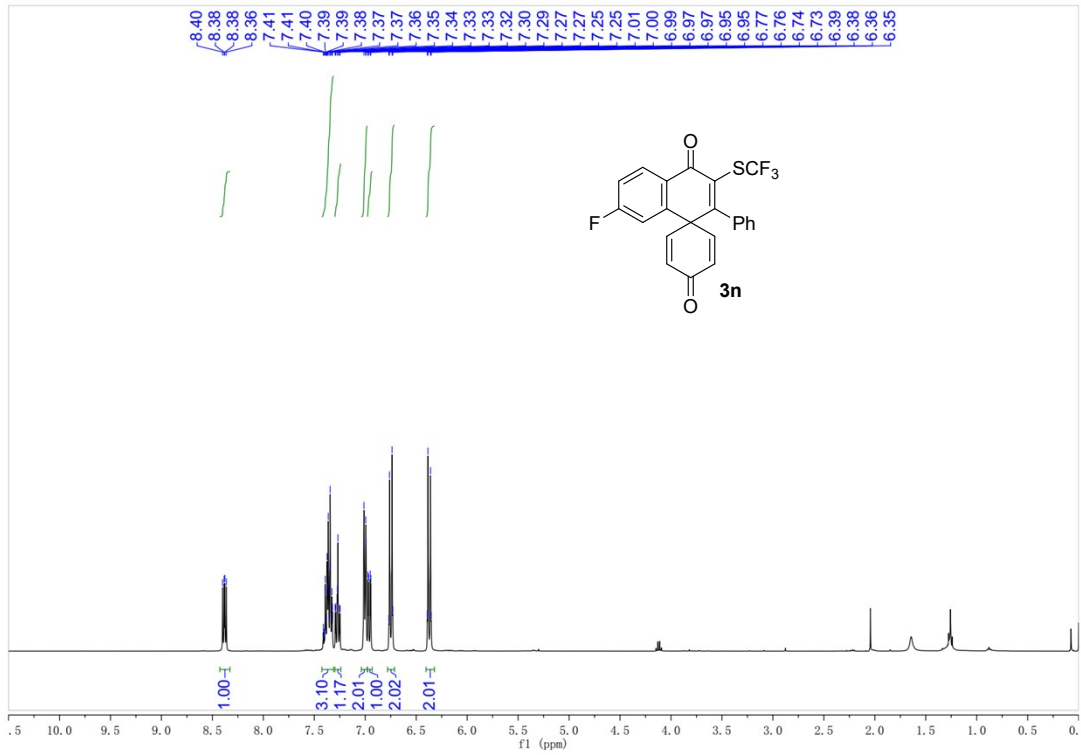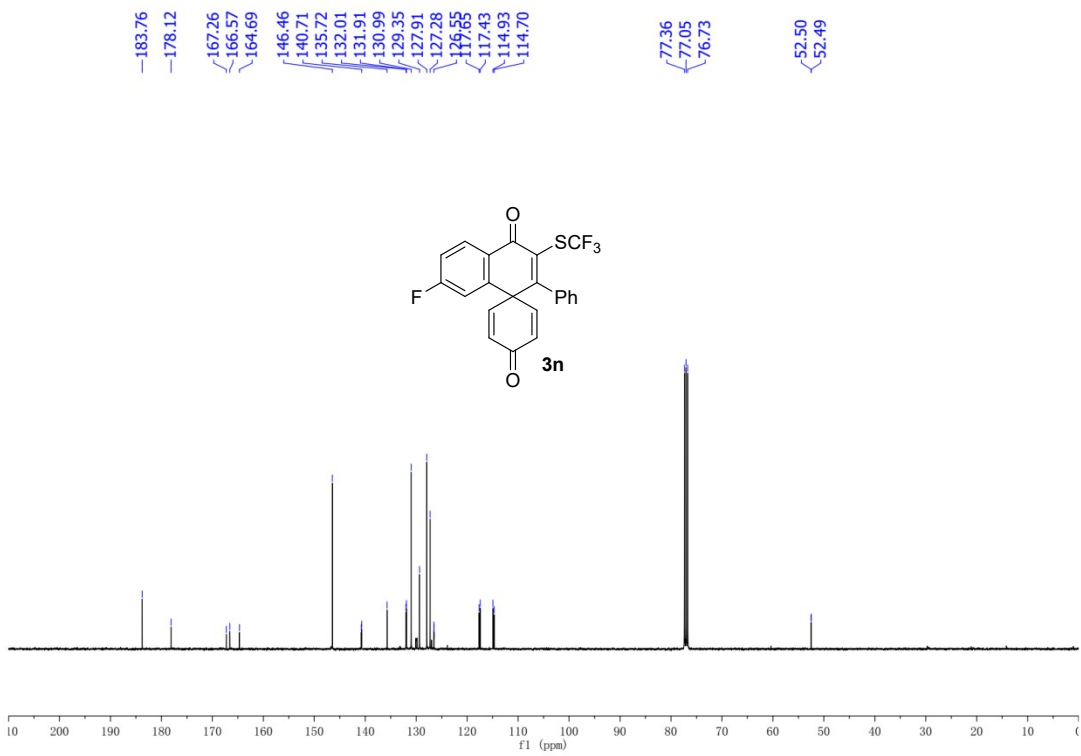

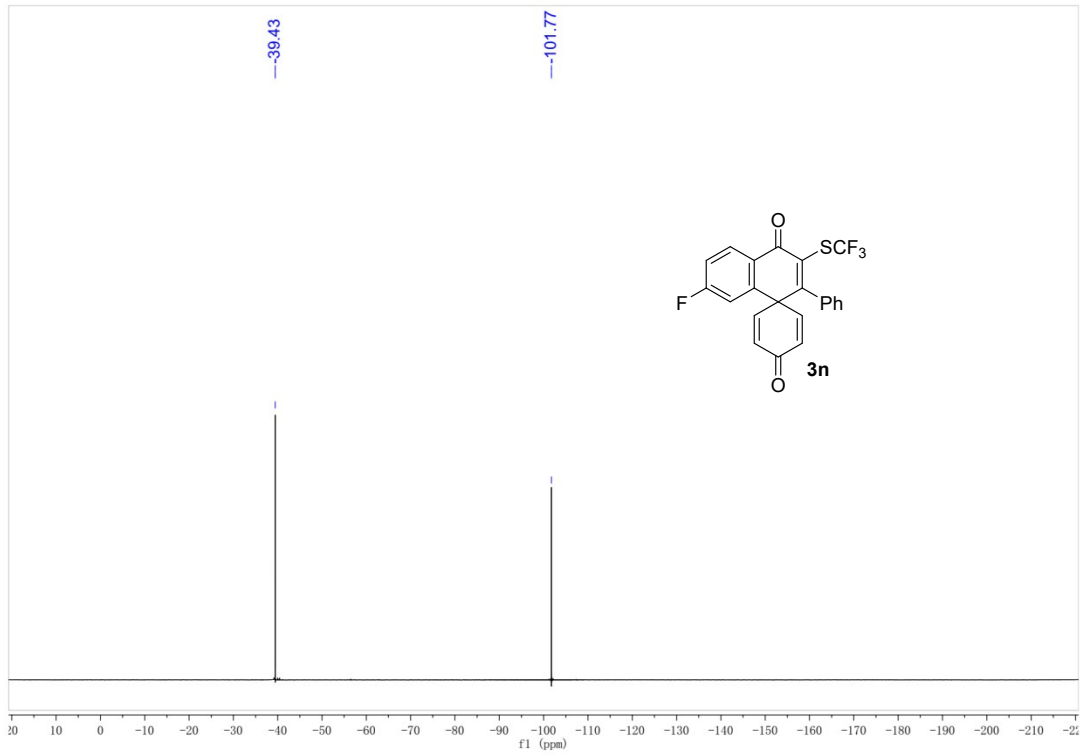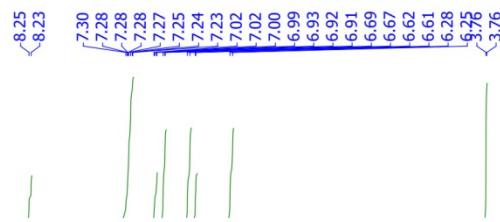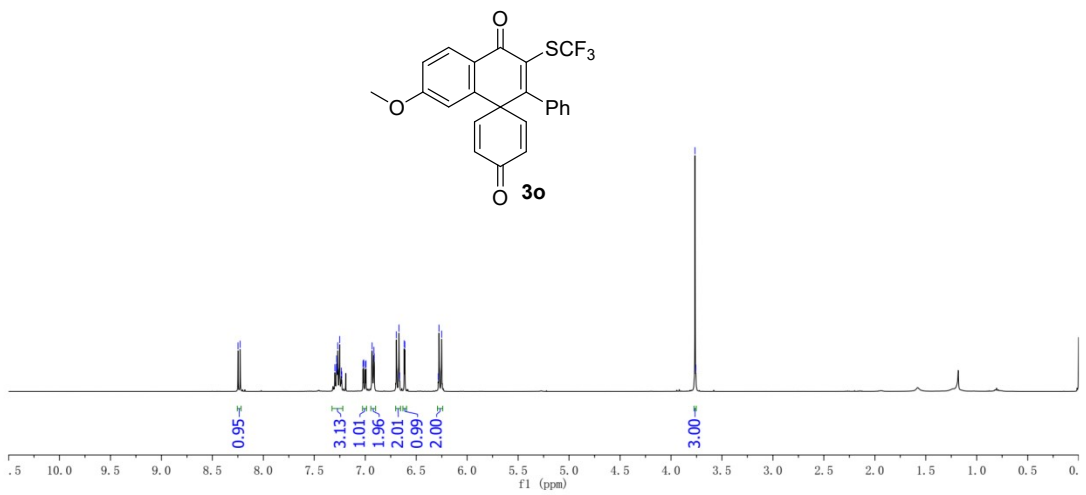

183.18  
177.21  
164.71  
163.01  
146.32  
138.92  
134.97  
130.22  
129.52  
128.09  
126.76  
126.37  
122.29  
114.66  
111.41  
76.33  
76.01  
75.70  
54.72  
51.65

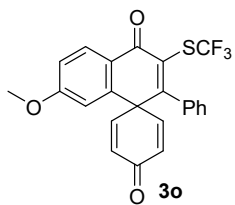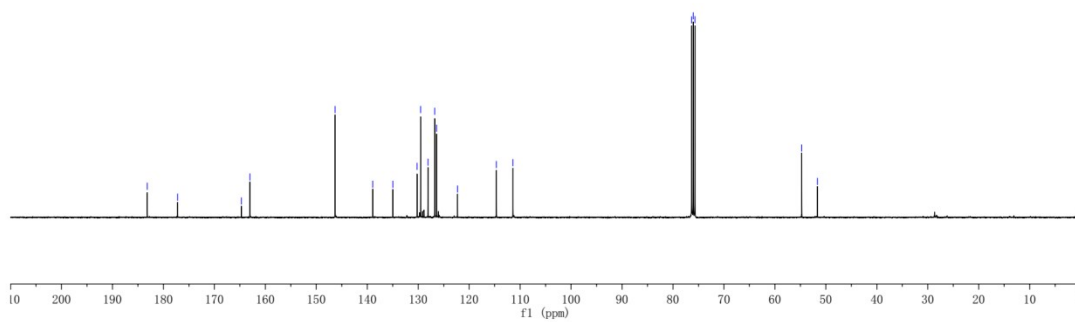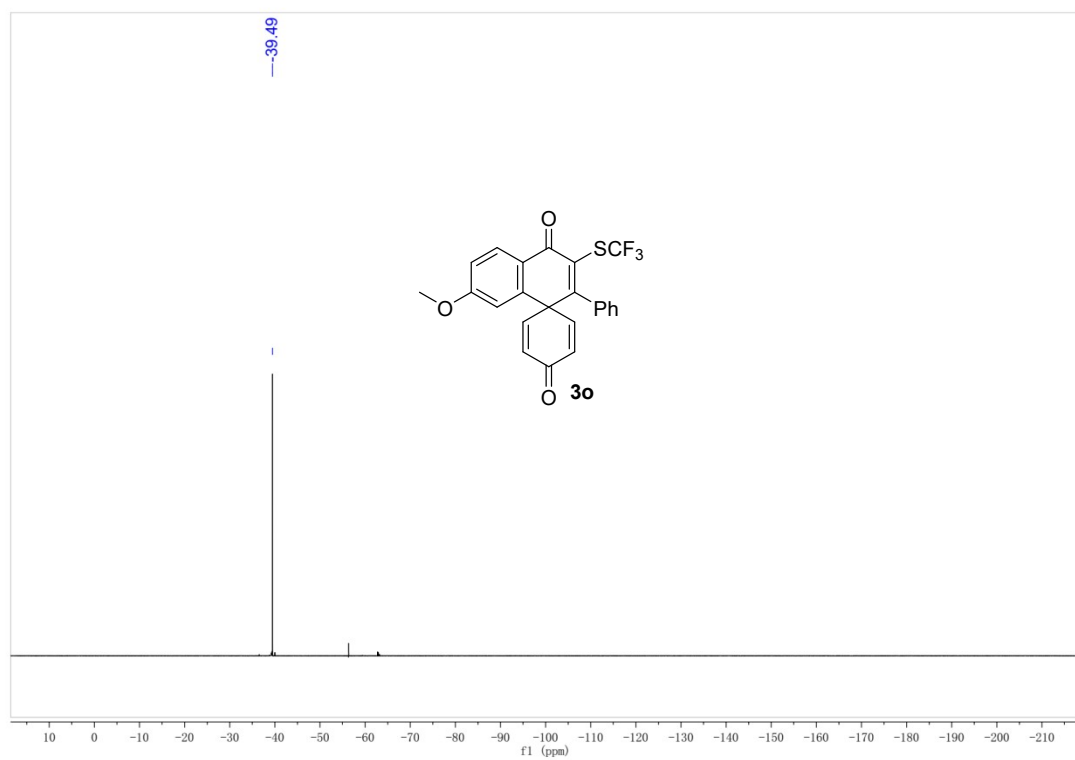

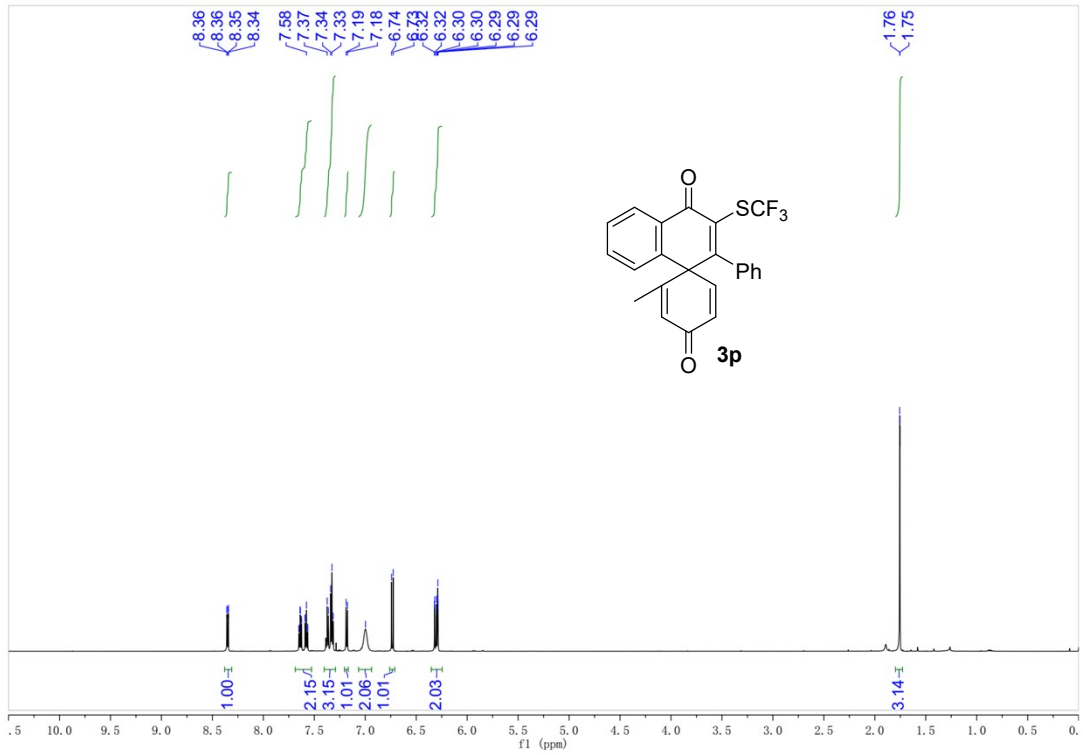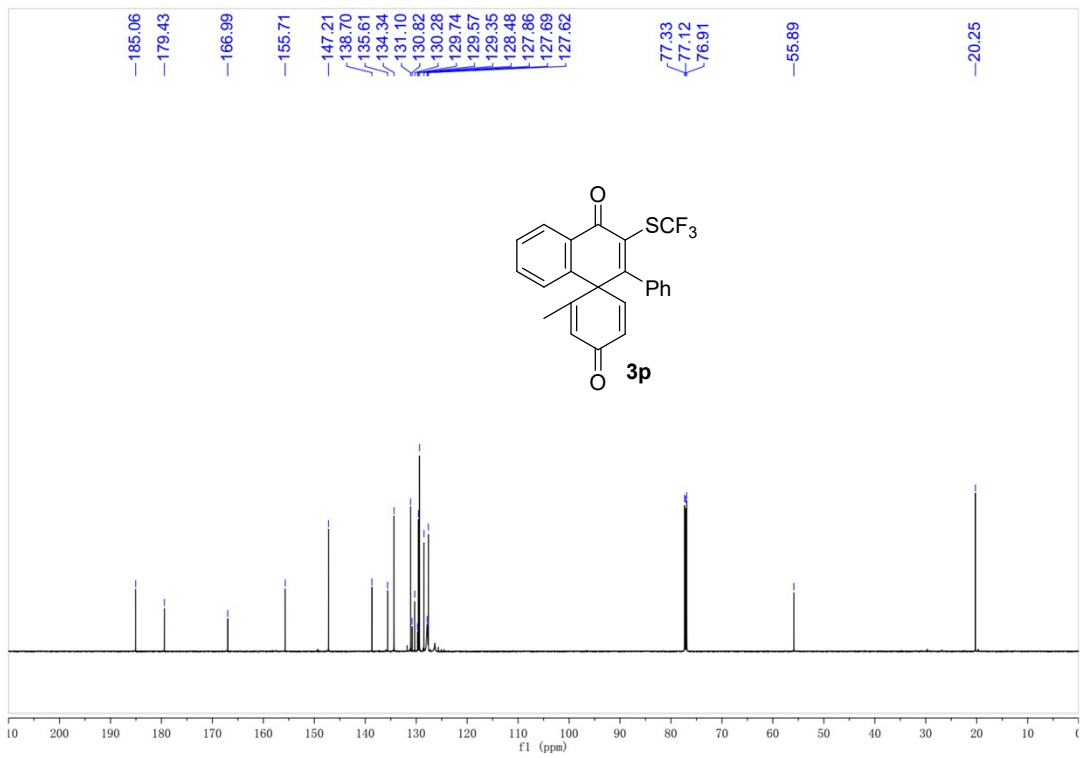



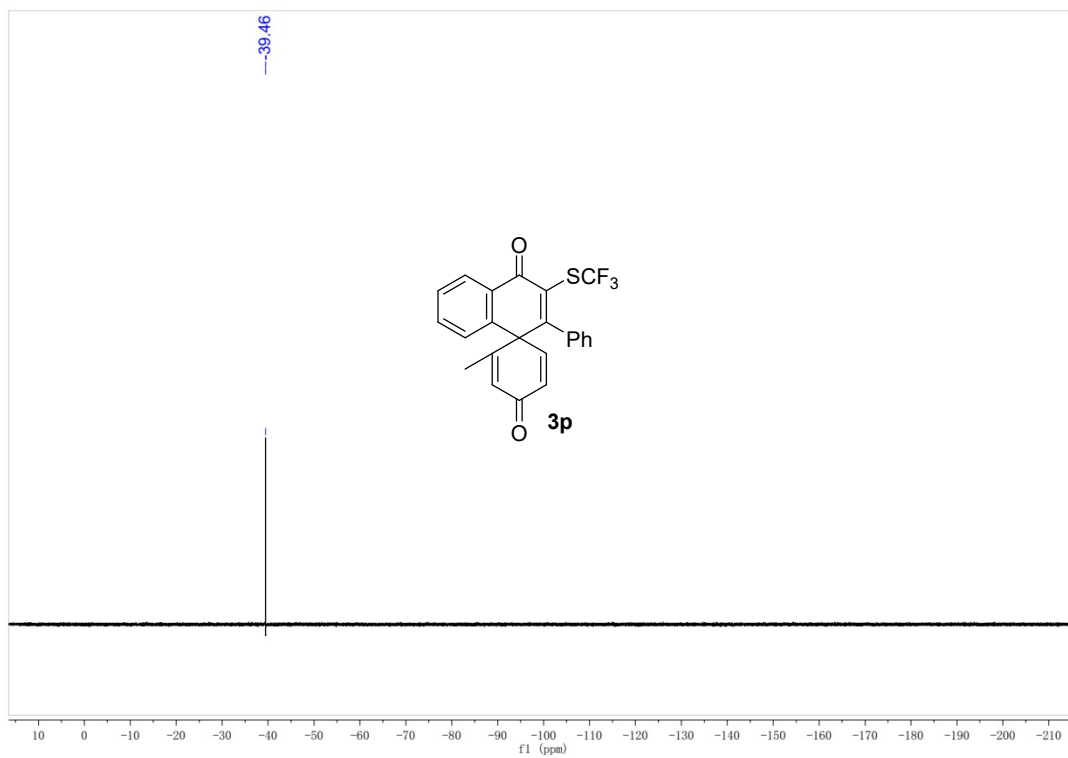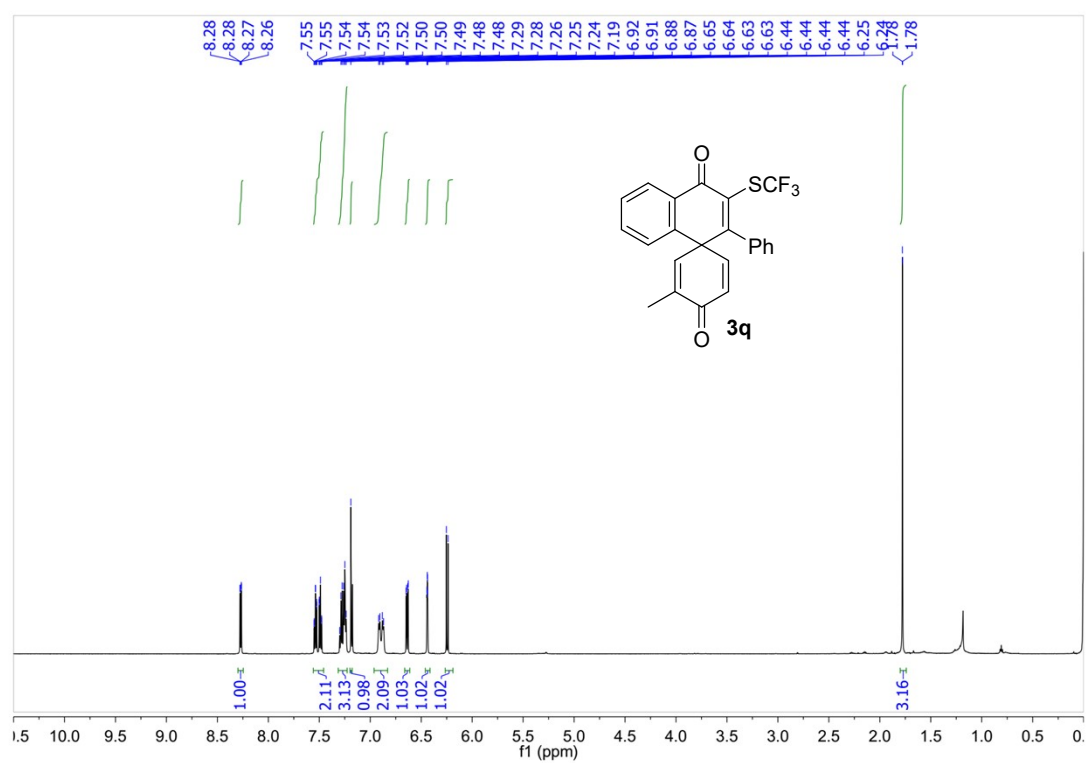

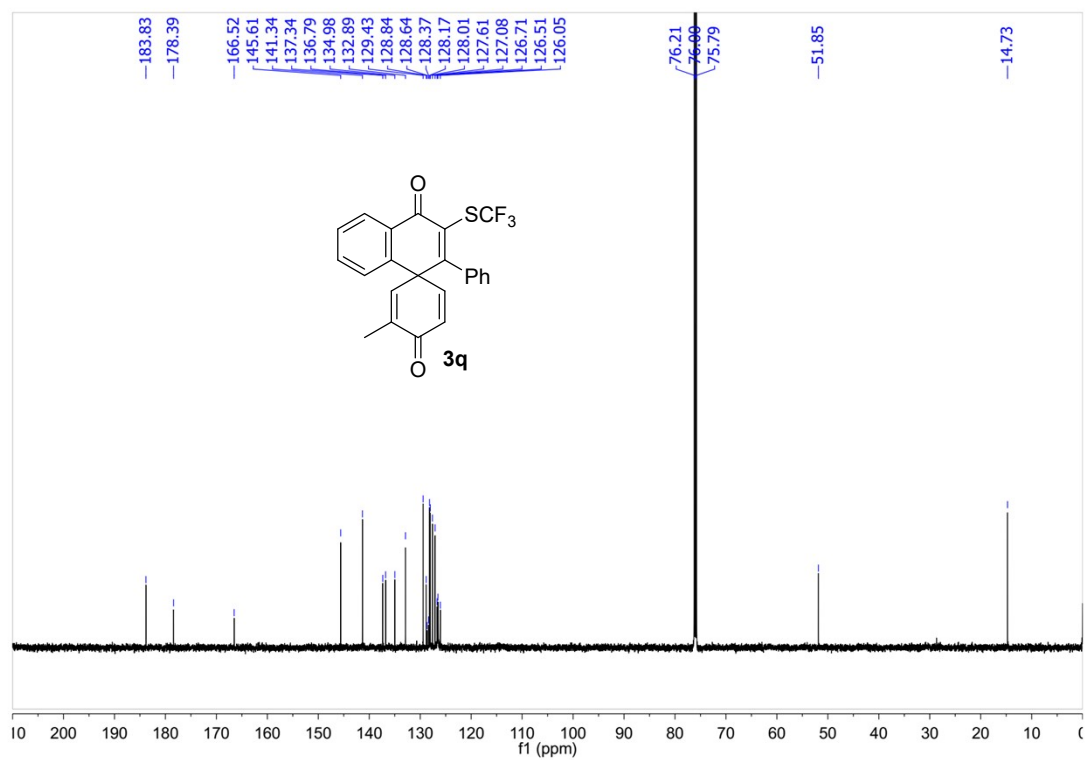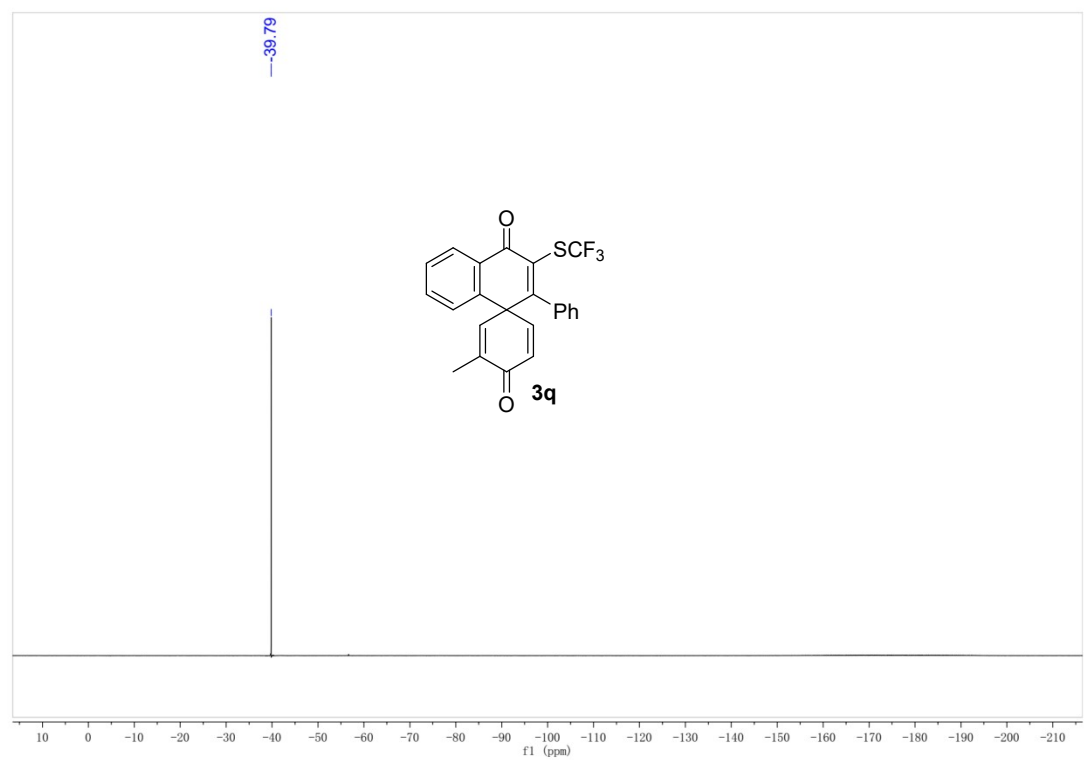

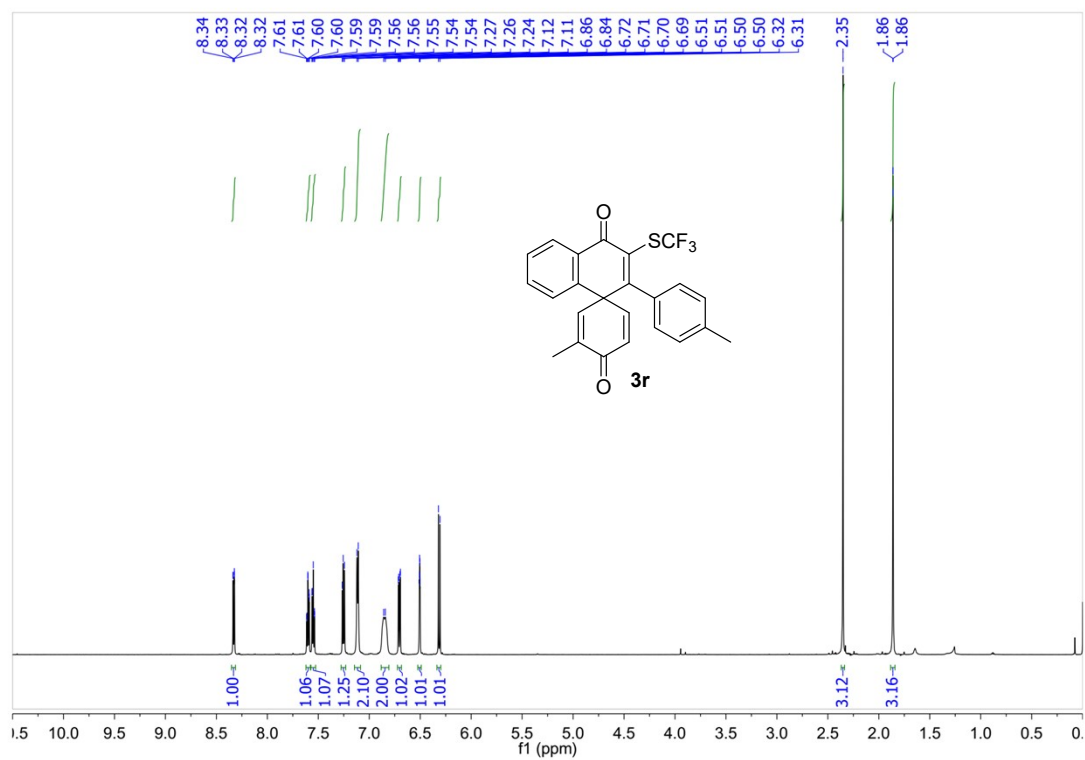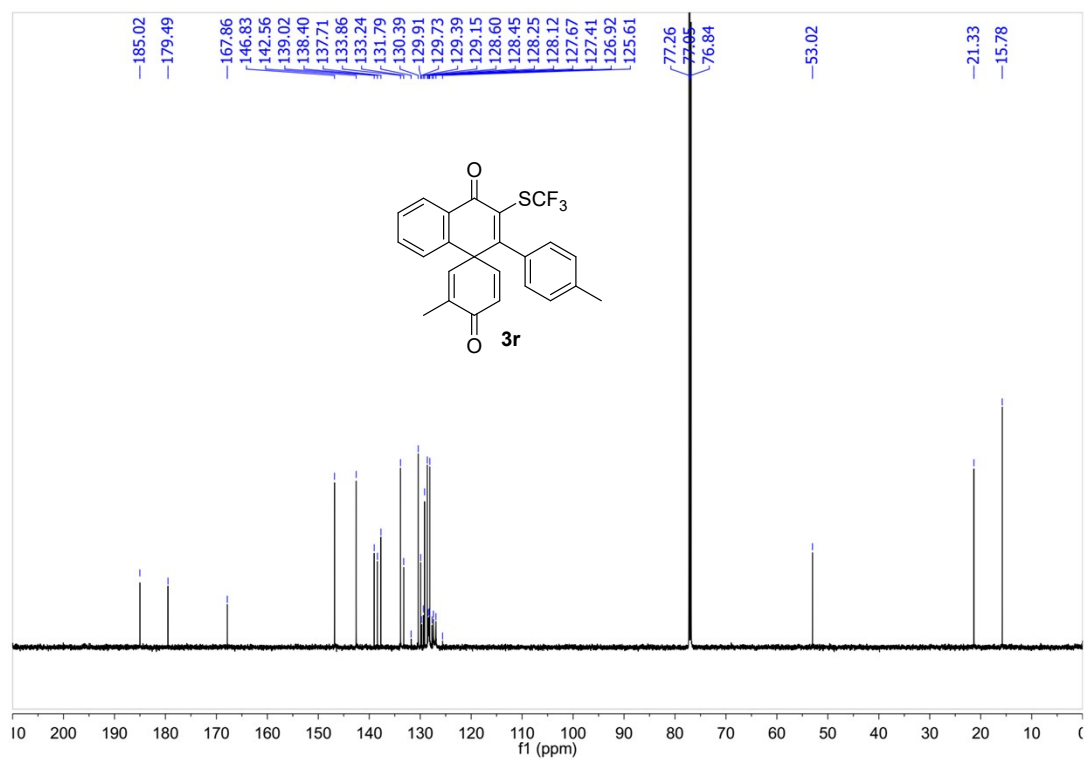

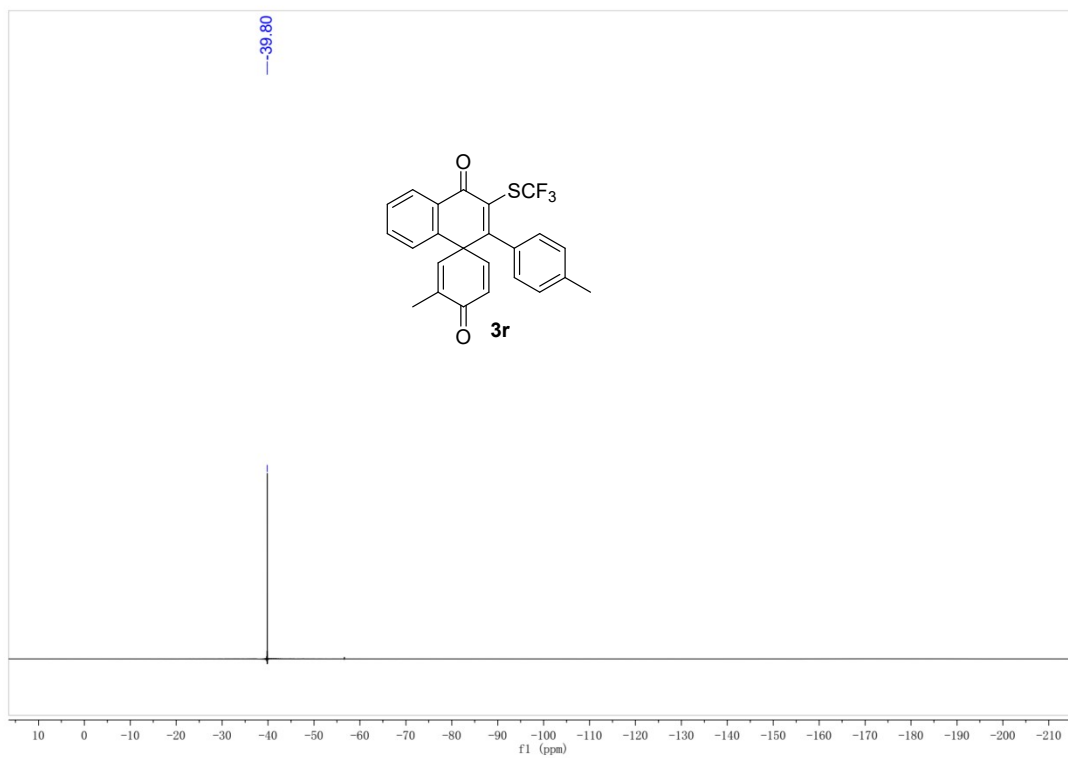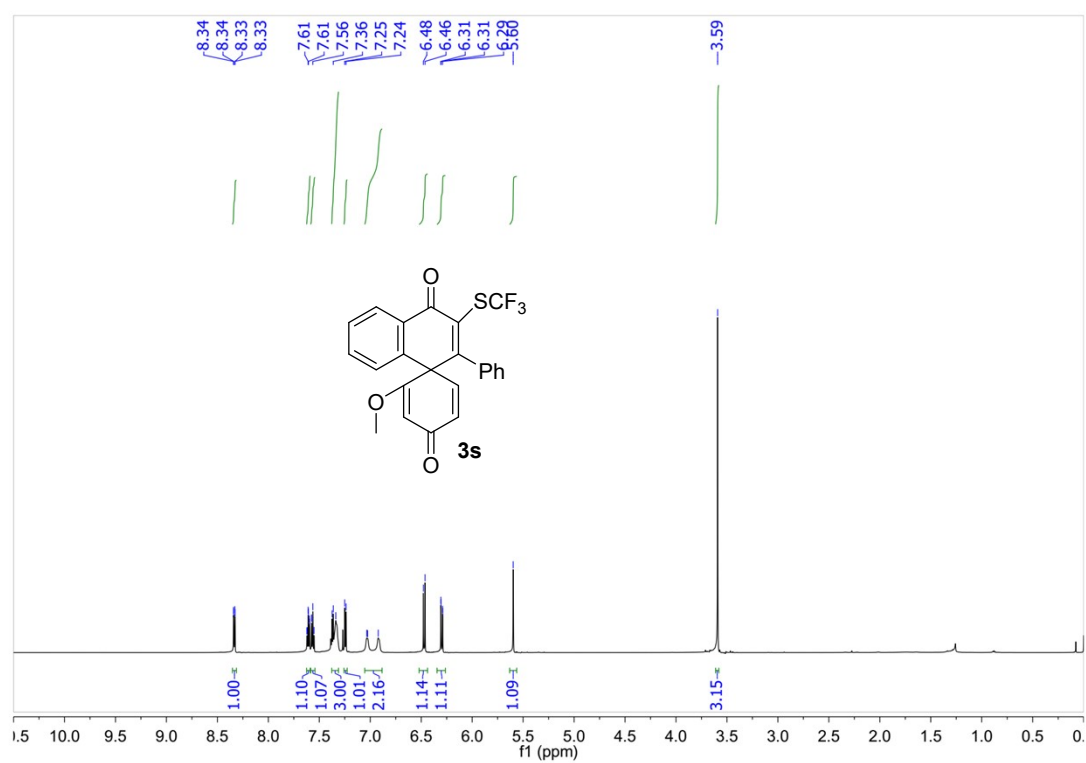

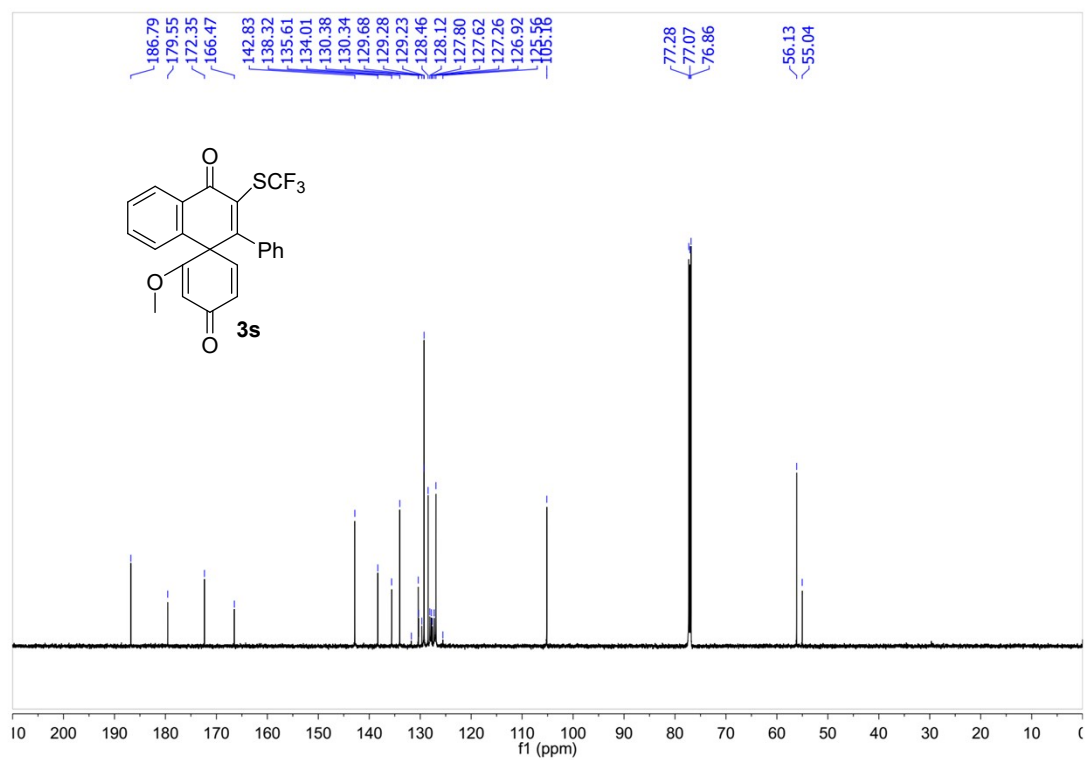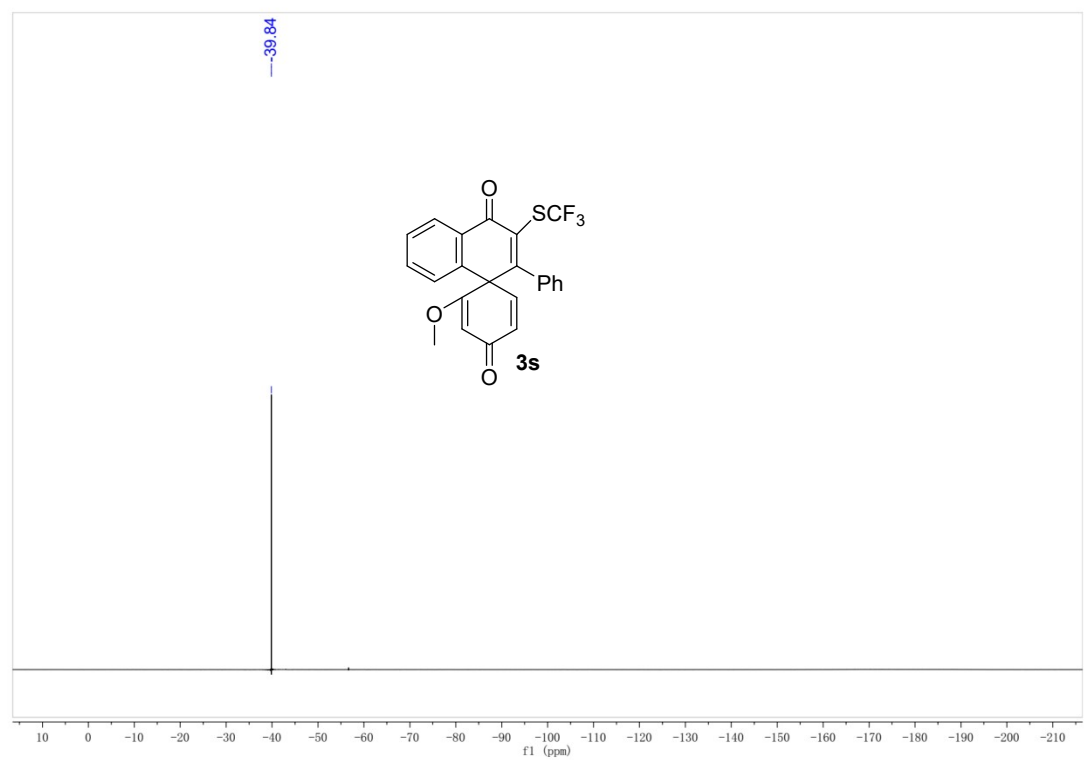

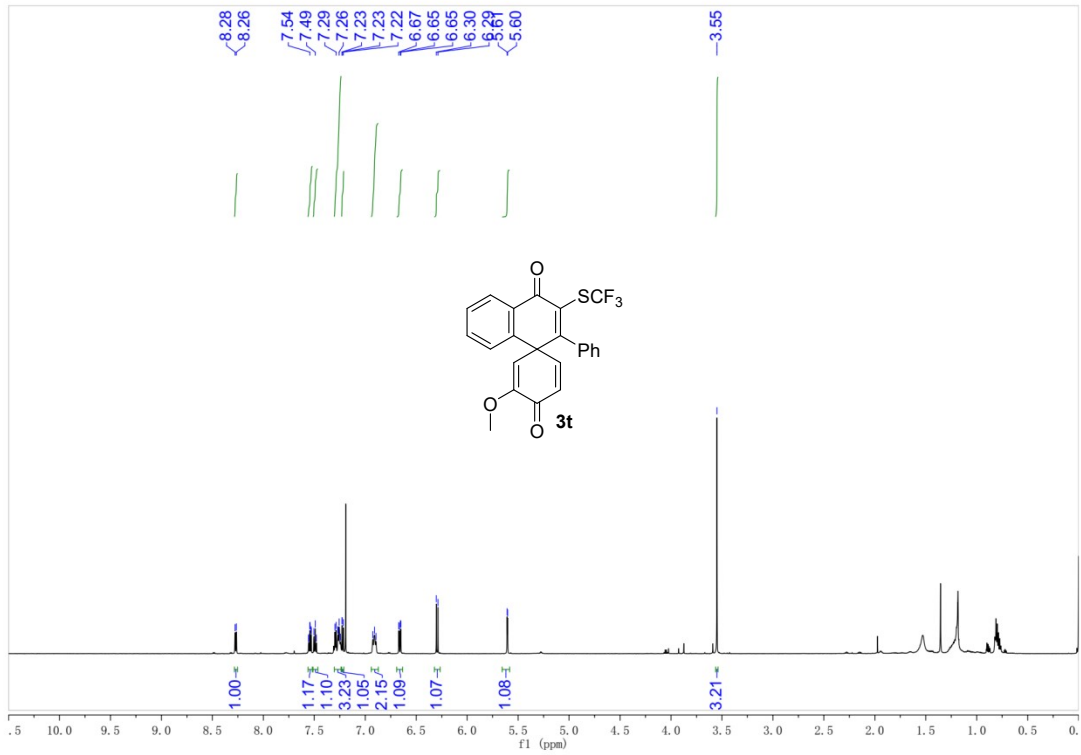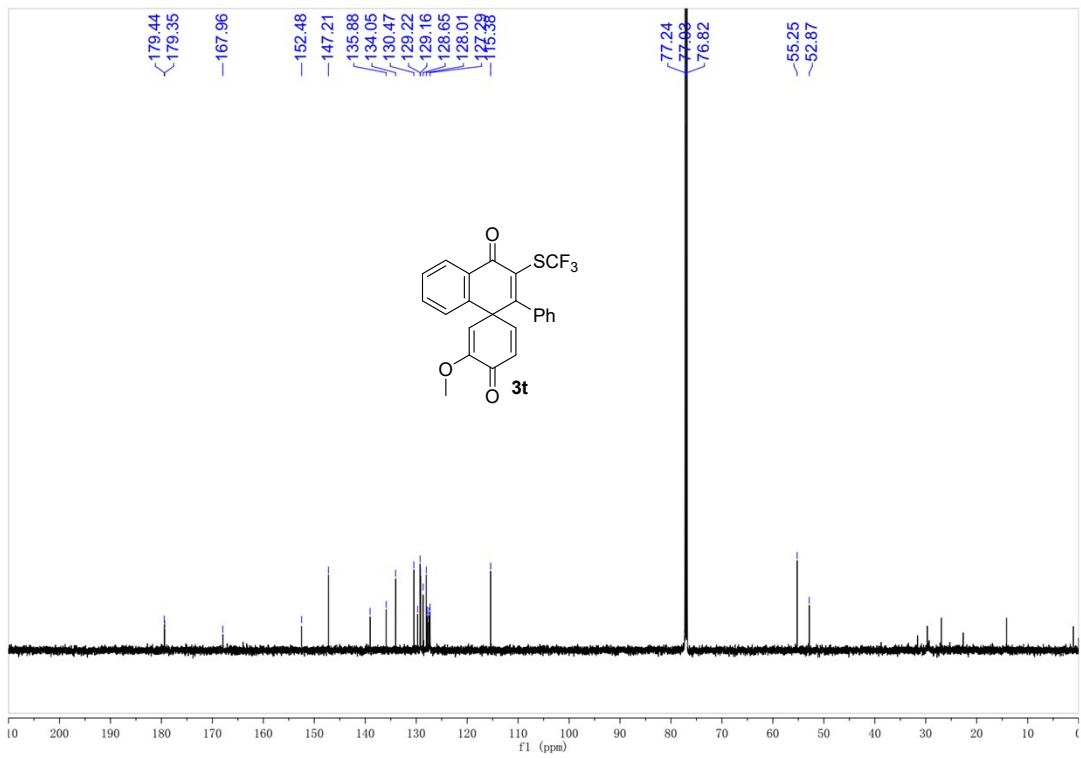

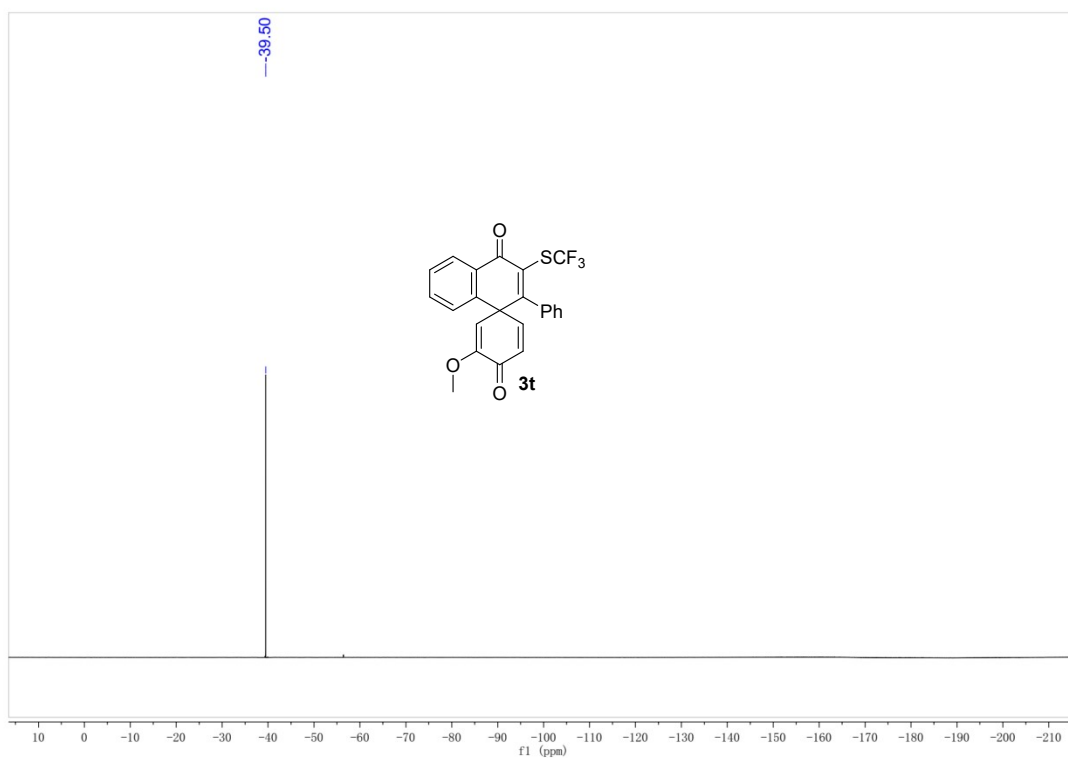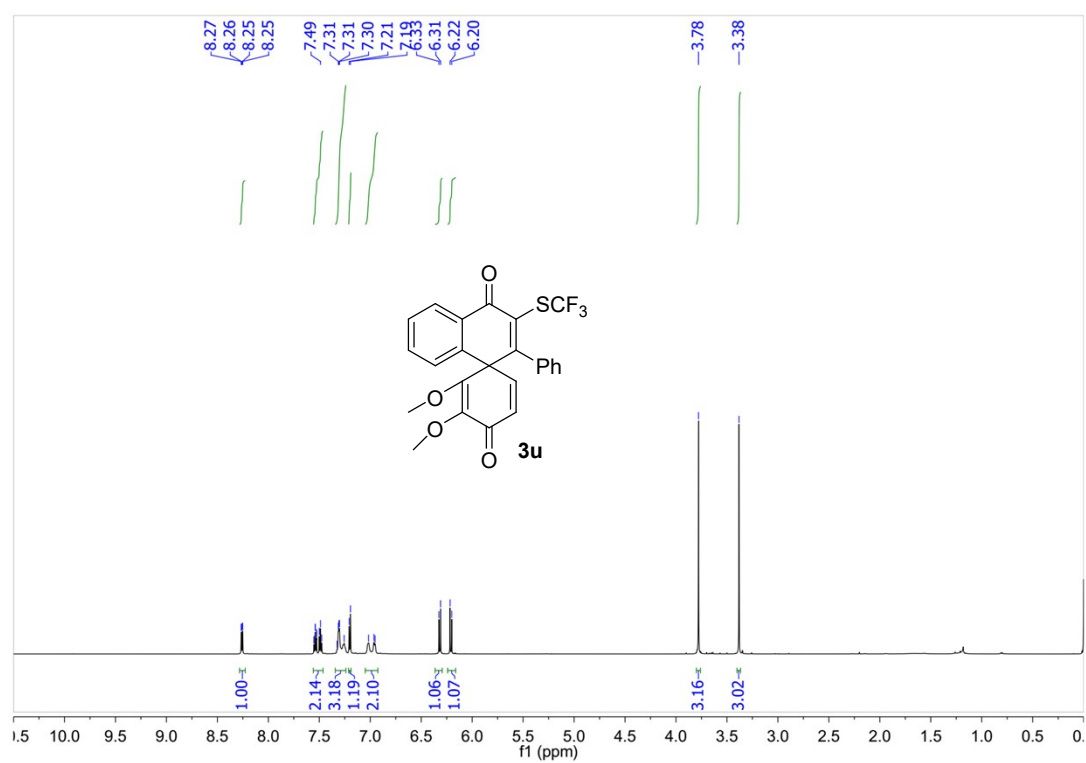

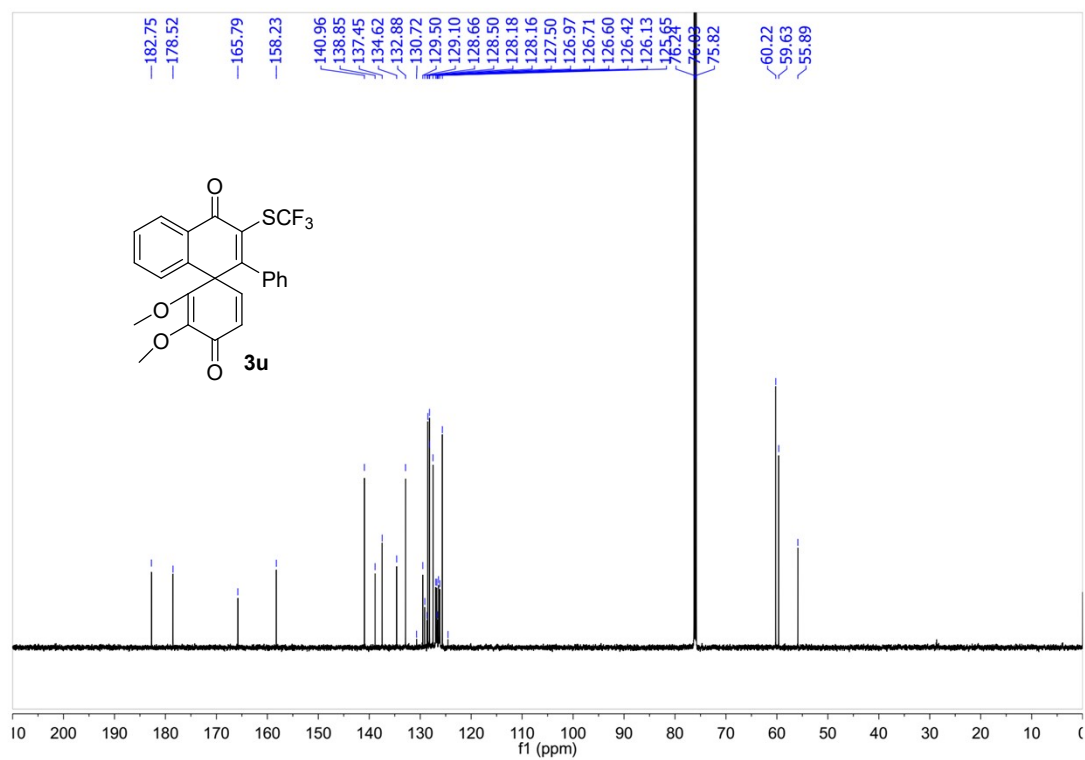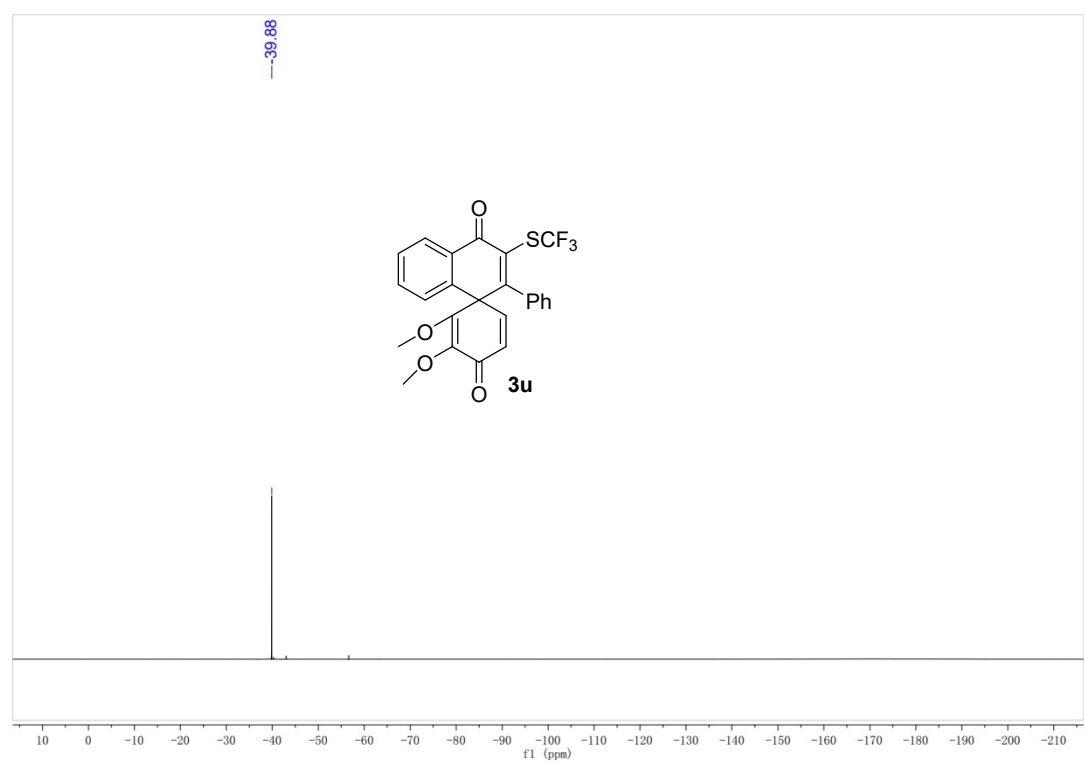



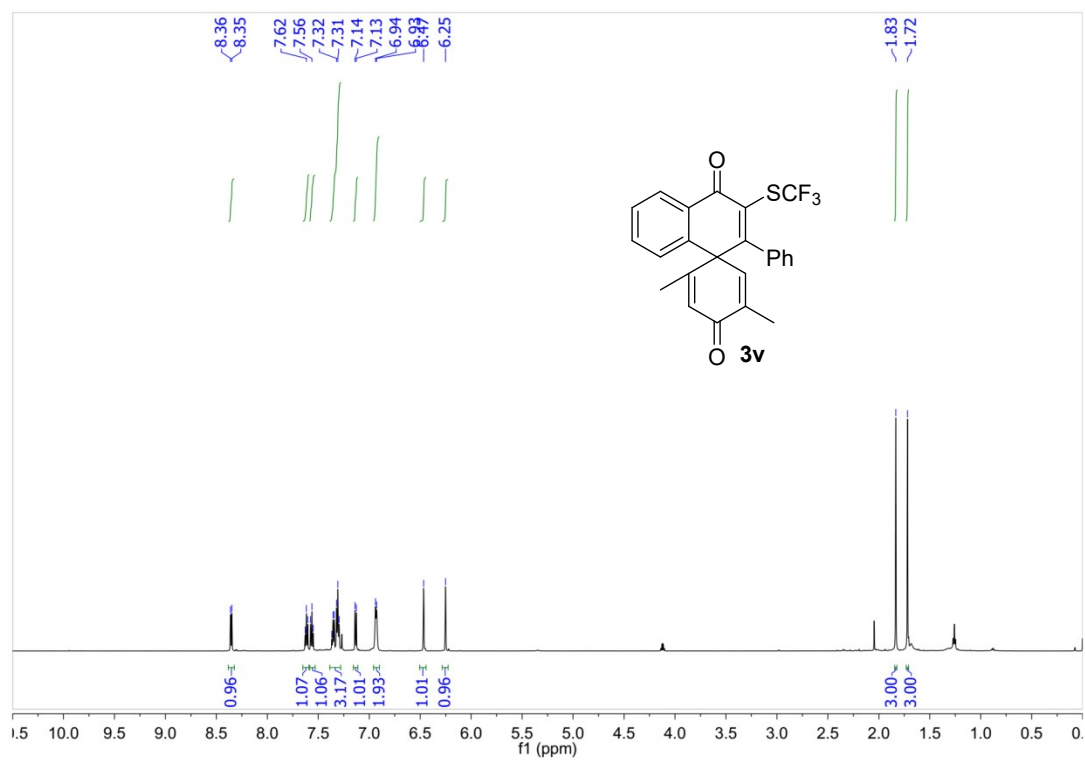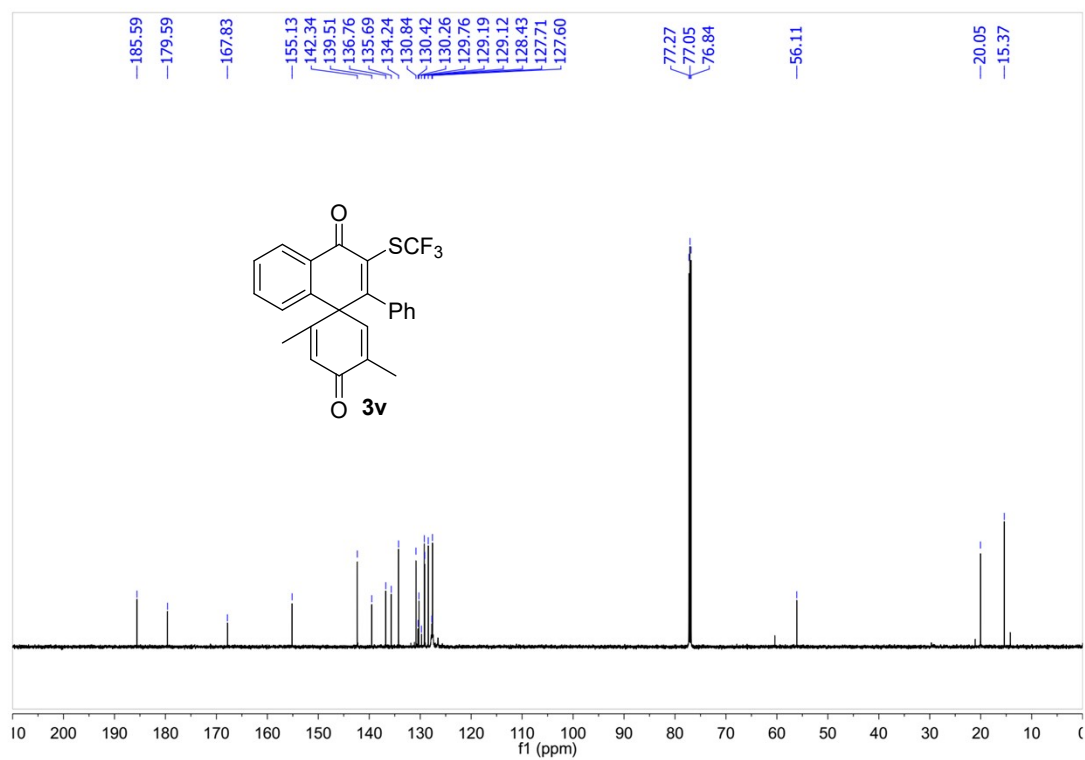

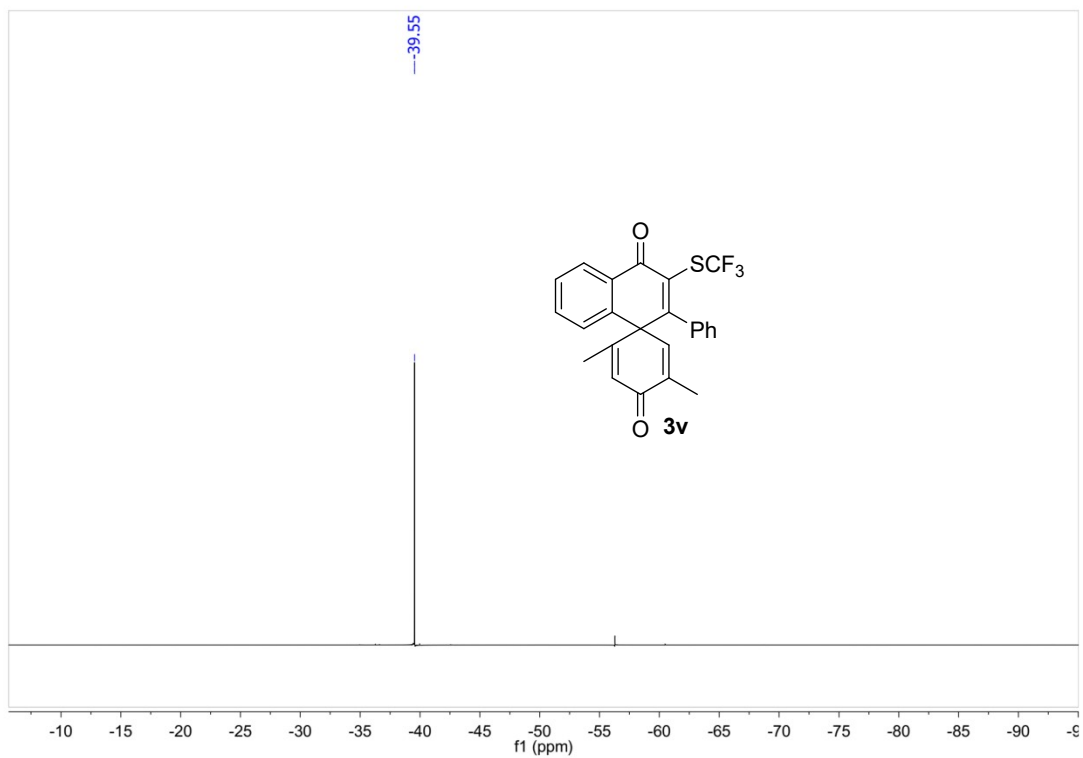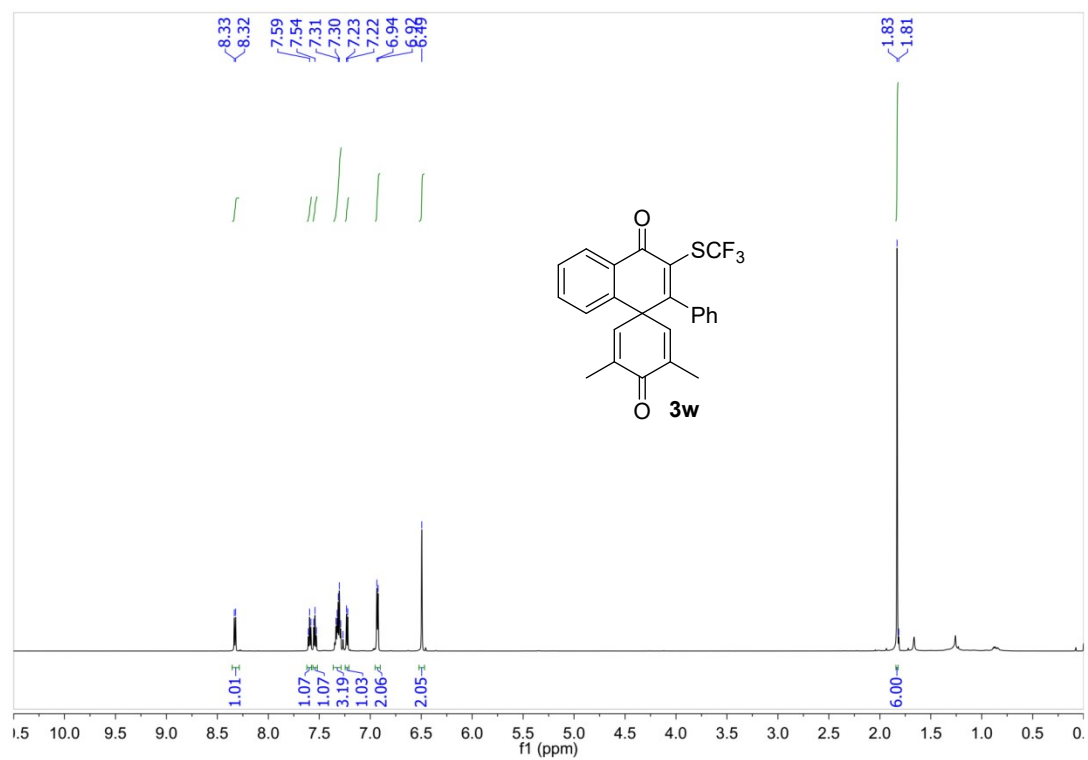

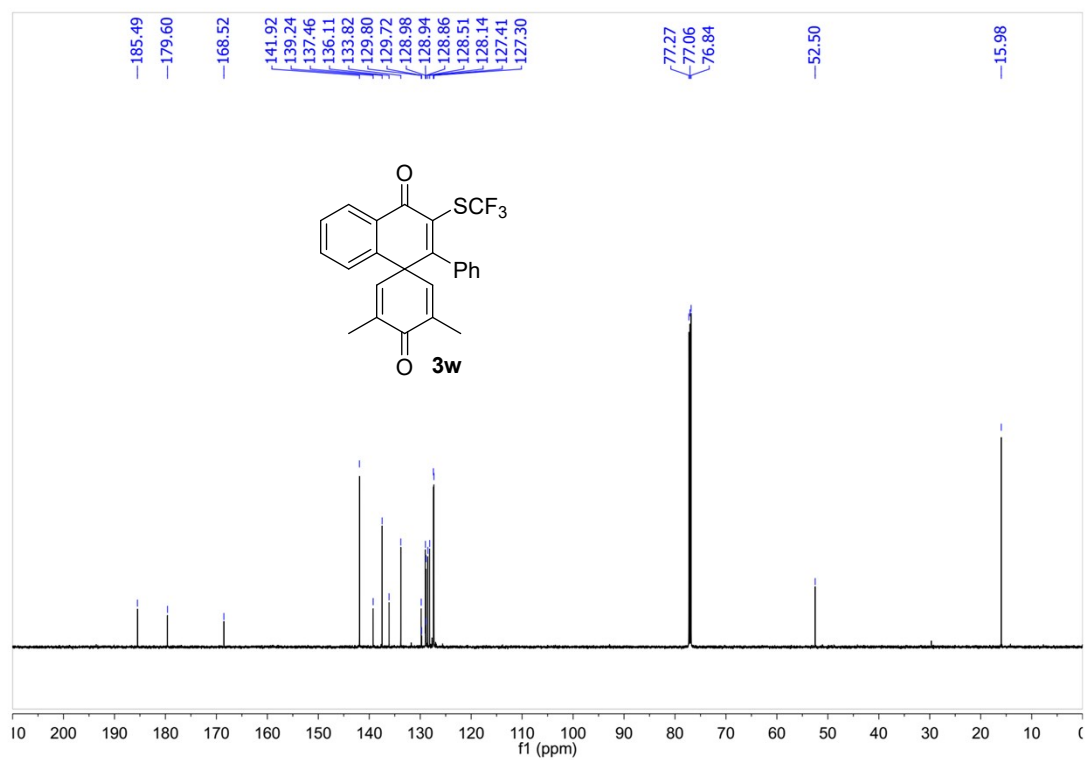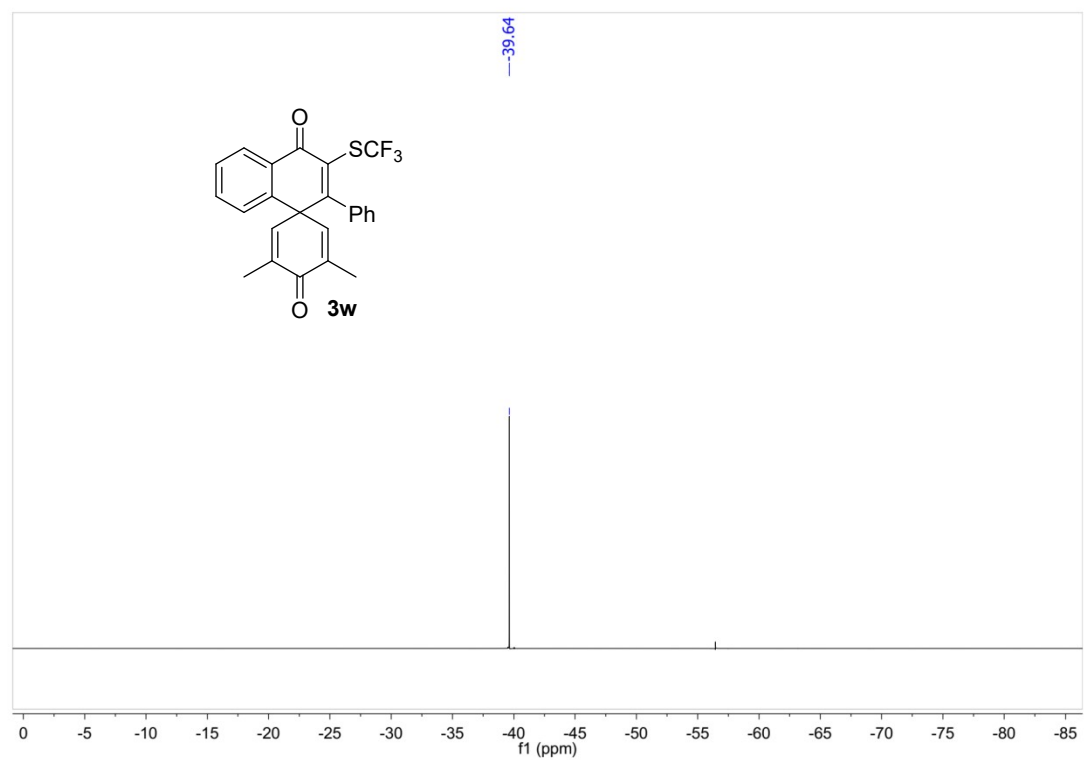

Supplement: d2nj01056a1.pdf [file d2nj01056a1.pdf]
